# Supplementary material for: Chromatin de-condensation by switching substrate elasticity
Source: PubMed Central journal article supplement (PMC6107547; doi:10.1038/s41598-018-31023-2), 2018-08-23
Supplement: 41598_2018_31023_MOESM2_ESM.pdf [file 41598_2018_31023_MOESM2_ESM.pdf]

| Ensembl gene id | Gene name  | Description                                              | log2(Select/CTRL) | FC (Select/CTRL) | P-value (Select vs CTRL) | Adjusted p-value (Select vs CTRL) |
|-----------------|------------|----------------------------------------------------------|-------------------|------------------|--------------------------|-----------------------------------|
| ENSG00000175899 | A2M        | alpha-2-macroglobulin                                    | 1,2039            | 2,3036           | 0,0000                   | 0,0000                            |
| ENSG00000109576 | AADAT      | aminoadipate aminotransferase                            | -0,8066           | 0,5717           | 0,0000                   | 0,0000                            |
| ENSG00000090861 | AARS       | alanyl-tRNA synthetase                                   | 1,0278            | 2,0390           | 0,0000                   | 0,0000                            |
| ENSG00000157426 | AASDH      | aminoadipate-semialdehyde dehydrogenase                  | 0,5177            | 1,4316           | 0,0000                   | 0,0000                            |
| ENSG00000183044 | ABAT       | 4-aminobutyrate aminotransferase                         | -1,0978           | 0,4672           | 0,0000                   | 0,0000                            |
| ENSG00000107331 | ABCA2      | ATP-binding cassette, sub-family A (ABC1), member 2      | 0,6920            | 1,6155           | 0,0008                   | 0,0079                            |
| ENSG00000167972 | ABCA3      | ATP-binding cassette, sub-family A (ABC1), member 3      | 0,7036            | 1,6286           | 0,0001                   | 0,0018                            |
| ENSG00000005471 | ABCB4      | ATP-binding cassette, sub-family B (MDR/TAP), member 4   | -1,4669           | 0,3618           | 0,0000                   | 0,0000                            |
| ENSG00000125257 | ABCC4      | ATP-binding cassette, sub-family C (CFTR/MRP), member 4  | -0,9326           | 0,5239           | 0,0000                   | 0,0000                            |
| ENSG00000006071 | ABCC8      | ATP-binding cassette, sub-family C (CFTR/MRP), member 8  | 1,4312            | 2,6966           | 0,0000                   | 0,0000                            |
| ENSG00000164163 | ABCE1      | ATP-binding cassette, sub-family E (OABP), member 1      | -0,5461           | 0,6849           | 0,0000                   | 0,0000                            |
| ENSG00000033050 | ABCF2      | ATP-binding cassette, sub-family F (GCN20), member 2     | -0,3830           | 0,7668           | 0,0000                   | 0,0004                            |
| ENSG00000160179 | ABCG1      | ATP-binding cassette, sub-family G (WHITE), member 1     | 1,1066            | 2,1534           | 0,0000                   | 0,0000                            |
| ENSG00000143994 | ABHD1      | abhydrolase domain containing 1                          | 0,9858            | 1,9804           | 0,0000                   | 0,0000                            |
| ENSG00000106077 | ABHD11     | abhydrolase domain containing 11                         | 0,4661            | 1,3814           | 0,0000                   | 0,0000                            |
| ENSG00000139826 | ABHD13     | abhydrolase domain containing 13                         | -0,9917           | 0,5029           | 0,0000                   | 0,0000                            |
| ENSG00000100439 | ABHD4      | abhydrolase domain containing 4                          | 0,5024            | 1,4166           | 0,0000                   | 0,0000                            |
| ENSG00000163995 | ABLIM2     | actin binding LIM protein family, member 2               | 0,6095            | 1,5258           | 0,0000                   | 0,0000                            |
| ENSG00000173210 | ABLIM3     | actin binding LIM protein family, member 3               | 0,7856            | 1,7238           | 0,0005                   | 0,0056                            |
| ENSG00000146386 | ABRACL     | ABRA C-terminal like                                     | -0,4703           | 0,7218           | 0,0000                   | 0,0004                            |
| ENSG00000114626 | ABTB1      | ankyrin repeat and BTB (POZ) domain containing 1         | 0,8758            | 1,8350           | 0,0000                   | 0,0000                            |
| ENSG00000005189 | AC004381.6 | Putative RNA exonuclease NEF-sp                          | 0,3834            | 1,3044           | 0,0001                   | 0,0013                            |
| ENSG00000278540 | ACACA      | acetyl-CoA carboxylase alpha                             | -0,3912           | 0,7625           | 0,0000                   | 0,0000                            |
| ENSG00000076555 | ACACB      | acetyl-CoA carboxylase beta                              | 0,5995            | 1,5152           | 0,0000                   | 0,0000                            |
| ENSG00000111271 | ACAD10     | acyl-CoA dehydrogenase family, member 10                 | 0,4267            | 1,3442           | 0,0000                   | 0,0005                            |
| ENSG00000122971 | ACADS      | acyl-CoA dehydrogenase, C-2 to C-3 short chain           | 0,9035            | 1,8706           | 0,0000                   | 0,0000                            |
| ENSG00000072818 | ACAP1      | ArfGAP with coiled-coil, ankyrin repeat and PH domains 1 | 0,6641            | 1,5845           | 0,0000                   | 0,0003                            |
| ENSG00000120437 | ACAT2      | acetyl-CoA acetyltransferase 2                           | -0,5997           | 0,6599           | 0,0000                   | 0,0000                            |

|                 |            |                                                             |         |        |        |        |
|-----------------|------------|-------------------------------------------------------------|---------|--------|--------|--------|
| ENSG00000181513 | ACBD4      | acyl-CoA binding domain containing 4                        | 0,8333  | 1,7818 | 0,0000 | 0,0000 |
| ENSG00000078124 | ACER3      | alkaline ceramidase 3                                       | -0,4270 | 0,7438 | 0,0000 | 0,0002 |
| ENSG00000112304 | ACOT13     | acyl-CoA thioesterase 13                                    | 0,3861  | 1,3069 | 0,0002 | 0,0020 |
| ENSG00000123130 | ACOT9      | acyl-CoA thioesterase 9                                     | -0,4685 | 0,7227 | 0,0000 | 0,0000 |
| ENSG00000168306 | ACOX2      | acyl-CoA oxidase 2, branched chain                          | 1,1888  | 2,2796 | 0,0000 | 0,0000 |
| ENSG00000111644 | ACRBP      | acrosin binding protein                                     | 1,0974  | 2,1398 | 0,0000 | 0,0000 |
| ENSG00000167107 | ACSF2      | acyl-CoA synthetase family member 2                         | 0,6754  | 1,5970 | 0,0000 | 0,0000 |
| ENSG00000068366 | ACSL4      | acyl-CoA synthetase long-chain family member 4              | -0,5447 | 0,6855 | 0,0000 | 0,0000 |
| ENSG00000005187 | ACSM3      | acyl-CoA synthetase medium-chain family member 3            | 0,9472  | 1,9281 | 0,0000 | 0,0000 |
| ENSG00000111058 | ACSS3      | acyl-CoA synthetase short-chain family member 3             | 1,0427  | 2,0601 | 0,0001 | 0,0018 |
| ENSG00000178631 | ACTG1P1    | actin gamma 1 pseudogene 1                                  | 1,0044  | 2,0062 | 0,0002 | 0,0026 |
| ENSG00000117148 | ACTL8      | actin-like 8                                                | -0,9892 | 0,5038 | 0,0002 | 0,0022 |
| ENSG00000115091 | ACTR3      | ARP3 actin-related protein 3 homolog (yeast)                | -0,5025 | 0,7059 | 0,0000 | 0,0000 |
| ENSG00000184378 | ACTRT3     | actin-related protein T3                                    | -0,6170 | 0,6520 | 0,0001 | 0,0016 |
| ENSG00000114739 | ACVR2B     | activin A receptor, type IIB                                | 0,5105  | 1,4246 | 0,0000 | 0,0000 |
| ENSG00000229589 | ACVR2B-AS1 | ACVR2B antisense RNA 1                                      | 0,6895  | 1,6127 | 0,0000 | 0,0000 |
| ENSG00000196839 | ADA        | adenosine deaminase                                         | 0,5118  | 1,4258 | 0,0000 | 0,0000 |
| ENSG00000160323 | ADAMTS13   | ADAM metalloproteinase with thrombospondin type 1 motif, 13 | 1,0591  | 2,0836 | 0,0000 | 0,0000 |
| ENSG00000145808 | ADAMTS19   | ADAM metalloproteinase with thrombospondin type 1 motif, 19 | 0,6796  | 1,6017 | 0,0000 | 0,0000 |
| ENSG00000087116 | ADAMTS2    | ADAM metalloproteinase with thrombospondin type 1 motif, 2  | -1,2122 | 0,4316 | 0,0000 | 0,0002 |
| ENSG00000185761 | ADAMTSL5   | ADAMTS-like 5                                               | 0,6162  | 1,5328 | 0,0001 | 0,0017 |
| ENSG00000163050 | ADCK3      | aarF domain containing kinase 3                             | 0,4774  | 1,3923 | 0,0000 | 0,0000 |
| ENSG00000123815 | ADCK4      | aarF domain containing kinase 4                             | 0,4807  | 1,3955 | 0,0000 | 0,0005 |
| ENSG00000181790 | ADGRB1     | adhesion G protein-coupled receptor B1                      | 1,4683  | 2,7670 | 0,0000 | 0,0000 |
| ENSG00000272734 | ADIRF-AS1  | ADIRF antisense RNA 1                                       | 0,4416  | 1,3581 | 0,0000 | 0,0004 |
| ENSG00000148926 | ADM        | adrenomedullin                                              | 0,6277  | 1,5451 | 0,0000 | 0,0000 |
| ENSG00000128165 | ADM2       | adrenomedullin 2                                            | 1,6954  | 3,2387 | 0,0000 | 0,0000 |
| ENSG00000170214 | ADRA1B     | adrenoceptor alpha 1B                                       | -0,6301 | 0,6461 | 0,0000 | 0,0000 |
| ENSG00000173020 | ADRBK1     | adrenergic, beta, receptor kinase 1                         | 0,5507  | 1,4648 | 0,0000 | 0,0000 |
| ENSG00000100077 | ADRBK2     | adrenergic, beta, receptor kinase 2                         | -0,4460 | 0,7341 | 0,0000 | 0,0000 |
| ENSG00000185100 | ADSSL1     | adenylosuccinate synthase like 1                            | 0,7325  | 1,6616 | 0,0000 | 0,0000 |

|                 |          |                                                                      |         |        |        |        |
|-----------------|----------|----------------------------------------------------------------------|---------|--------|--------|--------|
| ENSG00000155966 | AFF2     | AF4/FMR2 family, member 2                                            | -0,7784 | 0,5830 | 0,0001 | 0,0013 |
| ENSG00000144218 | AFF3     | AF4/FMR2 family, member 3                                            | -0,6186 | 0,6513 | 0,0000 | 0,0000 |
| ENSG00000183077 | AFMID    | arylformamidase                                                      | 0,5296  | 1,4435 | 0,0000 | 0,0000 |
| ENSG00000134698 | AGO4     | argonaute RISC catalytic component 4                                 | 0,5166  | 1,4305 | 0,0000 | 0,0000 |
| ENSG0000026652  | AGPAT4   | 1-acylglycerol-3-phosphate O-acyltransferase 4                       | -0,9514 | 0,5171 | 0,0004 | 0,0046 |
| ENSG00000185567 | AHNAK2   | AHNAK nucleoprotein 2                                                | 0,6906  | 1,6139 | 0,0000 | 0,0000 |
| ENSG00000106546 | AHR      | aryl hydrocarbon receptor                                            | -0,4504 | 0,7319 | 0,0000 | 0,0000 |
| ENSG00000063438 | AHRR     | aryl-hydrocarbon receptor repressor                                  | 1,1708  | 2,2514 | 0,0000 | 0,0000 |
| ENSG00000100591 | AHSA1    | AHA1, activator of heat shock 90kDa protein ATPase homolog 1 (yeast) | -0,3850 | 0,7658 | 0,0001 | 0,0018 |
| ENSG00000112297 | AIM1     | absent in melanoma 1                                                 | 0,5612  | 1,4755 | 0,0005 | 0,0053 |
| ENSG00000176092 | AIM1L    | absent in melanoma 1-like                                            | 0,5065  | 1,4206 | 0,0004 | 0,0041 |
| ENSG00000110711 | AIP      | aryl hydrocarbon receptor interacting protein                        | 0,4992  | 1,4135 | 0,0001 | 0,0008 |
| ENSG00000085231 | AK6      | adenylate kinase 6                                                   | -0,5023 | 0,7060 | 0,0000 | 0,0003 |
| ENSG00000165695 | AK8      | adenylate kinase 8                                                   | 0,8534  | 1,8068 | 0,0005 | 0,0051 |
| ENSG00000106948 | AKNA     | AT-hook transcription factor                                         | 0,7691  | 1,7042 | 0,0000 | 0,0000 |
| ENSG00000059573 | ALDH18A1 | aldehyde dehydrogenase 18 family, member A1                          | -0,4588 | 0,7276 | 0,0000 | 0,0000 |
| ENSG00000136010 | ALDH1L2  | aldehyde dehydrogenase 1 family, member L2                           | 0,9422  | 1,9215 | 0,0000 | 0,0001 |
| ENSG00000108602 | ALDH3A1  | aldehyde dehydrogenase 3 family, member A1                           | 1,0385  | 2,0540 | 0,0000 | 0,0000 |
| ENSG00000006534 | ALDH3B1  | aldehyde dehydrogenase 3 family, member B1                           | 1,1509  | 2,2206 | 0,0000 | 0,0000 |
| ENSG00000119711 | ALDH6A1  | aldehyde dehydrogenase 6 family, member A1                           | 0,4474  | 1,3636 | 0,0000 | 0,0000 |
| ENSG00000109107 | ALDOC    | aldolase C, fructose-bisphosphate                                    | 1,8633  | 3,6385 | 0,0000 | 0,0000 |
| ENSG00000253710 | ALG11    | ALG11, alpha-1,2-mannosyltransferase                                 | -0,6093 | 0,6555 | 0,0000 | 0,0000 |
| ENSG00000248671 | ALG1L9P  | asparagine-linked glycosylation 1-like 9, pseudogene                 | 0,7030  | 1,6278 | 0,0004 | 0,0040 |
| ENSG00000120697 | ALG5     | ALG5, dolichyl-phosphate beta-glucosyltransferase                    | -0,7236 | 0,6056 | 0,0000 | 0,0000 |
| ENSG00000159063 | ALG8     | ALG8, alpha-1,3-glucosyltransferase                                  | -0,3995 | 0,7581 | 0,0001 | 0,0013 |
| ENSG00000125652 | ALKBH7   | alkB homolog 7                                                       | 0,8616  | 1,8171 | 0,0000 | 0,0000 |
| ENSG00000137760 | ALKBH8   | alkB homolog 8, tRNA methyltransferase                               | -0,4858 | 0,7141 | 0,0000 | 0,0000 |
| ENSG00000179477 | ALOX12B  | arachidonate 12-lipoxygenase, 12R type                               | 0,4754  | 1,3903 | 0,0005 | 0,0053 |
| ENSG00000179593 | ALOX15B  | arachidonate 15-lipoxygenase, type B                                 | 0,9074  | 1,8756 | 0,0003 | 0,0031 |
| ENSG00000163295 | ALPI     | alkaline phosphatase, intestinal                                     | 2,0234  | 4,0654 | 0,0000 | 0,0000 |
| ENSG00000198796 | ALPK2    | alpha-kinase 2                                                       | -1,1074 | 0,4641 | 0,0000 | 0,0000 |

|                 |             |                                                                                  |         |        |        |        |
|-----------------|-------------|----------------------------------------------------------------------------------|---------|--------|--------|--------|
| ENSG00000163283 | ALPP        | alkaline phosphatase, placental                                                  | 0,7795  | 1,7165 | 0,0000 | 0,0000 |
| ENSG00000178038 | ALS2CL      | ALS2 C-terminal like                                                             | 0,4648  | 1,3802 | 0,0005 | 0,0053 |
| ENSG00000123505 | AMD1        | adenosylmethionine decarboxylase 1                                               | -0,8997 | 0,5360 | 0,0000 | 0,0000 |
| ENSG00000162066 | AMDHD2      | amidohydrolase domain containing 2                                               | 0,6681  | 1,5890 | 0,0000 | 0,0005 |
| ENSG00000101935 | AMMECR1     | Alport syndrome, mental retardation, midface hypoplasia and elliptocytosis chrom | -0,4634 | 0,7253 | 0,0000 | 0,0000 |
| ENSG00000126016 | AMOT        | angiomotin                                                                       | 0,5088  | 1,4228 | 0,0000 | 0,0000 |
| ENSG00000114019 | AMOTL2      | angiomotin like 2                                                                | -0,5358 | 0,6898 | 0,0000 | 0,0000 |
| ENSG00000145020 | AMT         | aminomethyltransferase                                                           | 0,9814  | 1,9744 | 0,0000 | 0,0000 |
| ENSG00000153107 | ANAPC1      | anaphase promoting complex subunit 1                                             | -0,4374 | 0,7384 | 0,0000 | 0,0000 |
| ENSG00000053900 | ANAPC4      | anaphase promoting complex subunit 4                                             | -0,3982 | 0,7588 | 0,0007 | 0,0070 |
| ENSG00000196510 | ANAPC7      | anaphase promoting complex subunit 7                                             | -0,3949 | 0,7605 | 0,0000 | 0,0003 |
| ENSG00000214274 | ANG         | angiogenin, ribonuclease, RNase A family, 5                                      | 0,5887  | 1,5039 | 0,0010 | 0,0094 |
| ENSG00000148677 | ANKRD1      | ankyrin repeat domain 1 (cardiac muscle)                                         | -0,8677 | 0,5480 | 0,0000 | 0,0000 |
| ENSG00000088448 | ANKRD10     | ankyrin repeat domain 10                                                         | -0,8704 | 0,5470 | 0,0000 | 0,0000 |
| ENSG00000229152 | ANKRD10-IT1 | ANKRD10 intronic transcript 1                                                    | -1,0043 | 0,4985 | 0,0000 | 0,0000 |
| ENSG00000196593 | ANKRD20A19P | ankyrin repeat domain 20 family, member A19, pseudogene                          | 1,0959  | 2,1374 | 0,0000 | 0,0000 |
| ENSG00000154065 | ANKRD29     | ankyrin repeat domain 29                                                         | 0,7999  | 1,7410 | 0,0000 | 0,0000 |
| ENSG00000235711 | ANKRD34C    | ankyrin repeat domain 34C                                                        | 1,0497  | 2,0701 | 0,0001 | 0,0010 |
| ENSG00000186352 | ANKRD37     | ankyrin repeat domain 37                                                         | 1,1682  | 2,2473 | 0,0000 | 0,0000 |
| ENSG00000131620 | ANO1        | anoctamin 1, calcium activated chloride channel                                  | -0,5416 | 0,6870 | 0,0000 | 0,0000 |
| ENSG00000151572 | ANO4        | anoctamin 4                                                                      | 0,4521  | 1,3681 | 0,0000 | 0,0000 |
| ENSG00000074855 | ANO8        | anoctamin 8                                                                      | 0,5611  | 1,4754 | 0,0007 | 0,0070 |
| ENSG00000185101 | ANO9        | anoctamin 9                                                                      | 0,4552  | 1,3710 | 0,0007 | 0,0072 |
| ENSG00000143401 | ANP32E      | acidic (leucine-rich) nuclear phosphoprotein 32 family, member E                 | -0,4082 | 0,7536 | 0,0000 | 0,0001 |
| ENSG00000143412 | ANXA9       | annexin A9                                                                       | 0,7926  | 1,7322 | 0,0000 | 0,0000 |
| ENSG00000100478 | AP4S1       | adaptor-related protein complex 4, sigma 1 subunit                               | -0,4710 | 0,7215 | 0,0000 | 0,0005 |
| ENSG00000053770 | AP5M1       | adaptor-related protein complex 5, mu 1 subunit                                  | -0,5051 | 0,7046 | 0,0000 | 0,0000 |
| ENSG00000166313 | APBB1       | amyloid beta (A4) precursor protein-binding, family B, member 1 (Fe65)           | -0,5068 | 0,7038 | 0,0008 | 0,0074 |
| ENSG00000163697 | APBB2       | amyloid beta (A4) precursor protein-binding, family B, member 2                  | 0,5522  | 1,4663 | 0,0000 | 0,0000 |
| ENSG00000113108 | APBB3       | amyloid beta (A4) precursor protein-binding, family B, member 3                  | 0,6085  | 1,5247 | 0,0000 | 0,0000 |
| ENSG00000084234 | APLP2       | amyloid beta (A4) precursor-like protein 2                                       | -0,4719 | 0,7210 | 0,0000 | 0,0000 |

|                 |           |                                                                     |         |        |        |        |
|-----------------|-----------|---------------------------------------------------------------------|---------|--------|--------|--------|
| ENSG00000244509 | APOBEC3C  | apolipoprotein B mRNA editing enzyme, catalytic polypeptide-like 3C | -0,5322 | 0,6915 | 0,0000 | 0,0000 |
| ENSG00000130203 | APOE      | apolipoprotein E                                                    | 0,7328  | 1,6619 | 0,0000 | 0,0000 |
| ENSG00000100342 | APOL1     | apolipoprotein L, 1                                                 | 0,4673  | 1,3825 | 0,0008 | 0,0077 |
| ENSG00000221963 | APOL6     | apolipoprotein L, 6                                                 | 0,4105  | 1,3292 | 0,0001 | 0,0017 |
| ENSG00000240583 | AQP1      | aquaporin 1 (Colton blood group)                                    | 0,9415  | 1,9205 | 0,0001 | 0,0013 |
| ENSG00000169083 | AR        | androgen receptor                                                   | 1,2528  | 2,3831 | 0,0000 | 0,0000 |
| ENSG00000186635 | ARAP1     | ArfGAP with RhoGAP domain, ankyrin repeat and PH domain 1           | 0,4449  | 1,3613 | 0,0002 | 0,0022 |
| ENSG00000134287 | ARF3      | ADP-ribosylation factor 3                                           | -0,4899 | 0,7121 | 0,0000 | 0,0000 |
| ENSG00000081181 | ARG2      | arginase 2                                                          | 0,3862  | 1,3069 | 0,0000 | 0,0001 |
| ENSG00000134884 | ARGLU1    | arginine and glutamate rich 1                                       | -0,9408 | 0,5210 | 0,0000 | 0,0000 |
| ENSG00000163219 | ARHGAP25  | Rho GTPase activating protein 25                                    | 0,9494  | 1,9311 | 0,0005 | 0,0055 |
| ENSG00000137962 | ARHGAP29  | Rho GTPase activating protein 29                                    | -0,4038 | 0,7559 | 0,0000 | 0,0000 |
| ENSG00000031081 | ARHGAP31  | Rho GTPase activating protein 31                                    | -1,1661 | 0,4456 | 0,0000 | 0,0000 |
| ENSG00000004777 | ARHGAP33  | Rho GTPase activating protein 33                                    | 0,6846  | 1,6073 | 0,0000 | 0,0002 |
| ENSG00000089820 | ARHGAP4   | Rho GTPase activating protein 4                                     | 0,5378  | 1,4517 | 0,0000 | 0,0006 |
| ENSG00000124143 | ARHGAP40  | Rho GTPase activating protein 40                                    | 0,8267  | 1,7737 | 0,0000 | 0,0000 |
| ENSG00000165895 | ARHGAP42  | Rho GTPase activating protein 42                                    | 0,4225  | 1,3402 | 0,0001 | 0,0017 |
| ENSG00000123329 | ARHGAP9   | Rho GTPase activating protein 9                                     | 1,2906  | 2,4462 | 0,0000 | 0,0000 |
| ENSG00000074964 | ARHGEF10L | Rho guanine nucleotide exchange factor (GEF) 10-like                | 0,6214  | 1,5384 | 0,0001 | 0,0008 |
| ENSG00000130762 | ARHGEF16  | Rho guanine nucleotide exchange factor (GEF) 16                     | 0,8038  | 1,7457 | 0,0000 | 0,0000 |
| ENSG00000110237 | ARHGEF17  | Rho guanine nucleotide exchange factor (GEF) 17                     | 0,6499  | 1,5691 | 0,0000 | 0,0000 |
| ENSG00000240771 | ARHGEF25  | Rho guanine nucleotide exchange factor (GEF) 25                     | 0,5595  | 1,4738 | 0,0000 | 0,0000 |
| ENSG00000114790 | ARHGEF26  | Rho guanine nucleotide exchange factor (GEF) 26                     | 1,0835  | 2,1192 | 0,0000 | 0,0000 |
| ENSG00000214944 | ARHGEF28  | Rho guanine nucleotide exchange factor (GEF) 28                     | 0,4696  | 1,3847 | 0,0000 | 0,0001 |
| ENSG00000163947 | ARHGEF3   | Rho guanine nucleotide exchange factor (GEF) 3                      | -0,3809 | 0,7680 | 0,0000 | 0,0001 |
| ENSG00000183111 | ARHGEF37  | Rho guanine nucleotide exchange factor (GEF) 37                     | 0,6960  | 1,6200 | 0,0000 | 0,0000 |
| ENSG00000236699 | ARHGEF38  | Rho guanine nucleotide exchange factor (GEF) 38                     | 0,7358  | 1,6653 | 0,0002 | 0,0028 |
| ENSG00000102606 | ARHGEF7   | Rho guanine nucleotide exchange factor (GEF) 7                      | -0,6631 | 0,6315 | 0,0000 | 0,0000 |
| ENSG00000122644 | ARL4A     | ADP-ribosylation factor-like 4A                                     | -0,3940 | 0,7610 | 0,0001 | 0,0018 |
| ENSG00000170540 | ARL6IP1   | ADP-ribosylation factor-like 6 interacting protein 1                | -0,5041 | 0,7051 | 0,0000 | 0,0000 |
| ENSG00000170632 | ARMC10    | armadillo repeat containing 10                                      | -0,4840 | 0,7150 | 0,0000 | 0,0000 |

|                 |                |                                                            |         |        |        |        |
|-----------------|----------------|------------------------------------------------------------|---------|--------|--------|--------|
| ENSG00000271147 | ARMCX5-GPRASP2 | ARMCX5-GPRASP2 readthrough                                 | -0,5430 | 0,6863 | 0,0009 | 0,0089 |
| ENSG00000143437 | ARNT           | aryl hydrocarbon receptor nuclear translocator             | 0,4686  | 1,3838 | 0,0000 | 0,0000 |
| ENSG00000133794 | ARNTL          | aryl hydrocarbon receptor nuclear translocator-like        | -0,5204 | 0,6972 | 0,0000 | 0,0000 |
| ENSG00000163466 | ARPC2          | actin related protein 2/3 complex, subunit 2, 34kDa        | -0,4056 | 0,7549 | 0,0000 | 0,0001 |
| ENSG00000241553 | ARPC4          | actin related protein 2/3 complex, subunit 4, 20kDa        | -0,3794 | 0,7688 | 0,0000 | 0,0003 |
| ENSG00000136950 | ARPC5L         | actin related protein 2/3 complex, subunit 5-like          | -0,4161 | 0,7494 | 0,0000 | 0,0002 |
| ENSG00000197070 | ARRDC1         | arrestin domain containing 1                               | 0,4163  | 1,3345 | 0,0003 | 0,0036 |
| ENSG00000113369 | ARRDC3         | arrestin domain containing 3                               | 0,4326  | 1,3496 | 0,0000 | 0,0000 |
| ENSG00000117407 | ARTN           | artemin                                                    | 0,9619  | 1,9479 | 0,0000 | 0,0000 |
| ENSG00000099889 | ARVCF          | armadillo repeat gene deleted in velocardiofacial syndrome | 0,4958  | 1,4101 | 0,0009 | 0,0083 |
| ENSG00000005981 | ASB4           | ankyrin repeat and SOCS box containing 4                   | -0,5037 | 0,7053 | 0,0000 | 0,0000 |
| ENSG00000112249 | ASCC3          | activating signal cointegrator 1 complex subunit 3         | -0,4388 | 0,7377 | 0,0000 | 0,0000 |
| ENSG00000110881 | ASIC1          | acid sensing (proton gated) ion channel 1                  | 0,4414  | 1,3579 | 0,0000 | 0,0004 |
| ENSG00000070669 | ASNS           | asparagine synthetase (glutamine-hydrolyzing)              | 1,2432  | 2,3673 | 0,0000 | 0,0000 |
| ENSG00000198363 | ASPH           | aspartate beta-hydroxylase                                 | -0,4536 | 0,7302 | 0,0000 | 0,0000 |
| ENSG00000128203 | ASPHD2         | aspartate beta-hydroxylase domain containing 2             | -0,6832 | 0,6228 | 0,0000 | 0,0001 |
| ENSG00000066279 | ASPM           | abnormal spindle microtubule assembly                      | -0,5620 | 0,6774 | 0,0000 | 0,0000 |
| ENSG00000160072 | ATAD3B         | ATPase family, AAA domain containing 3B                    | -0,3846 | 0,7660 | 0,0008 | 0,0077 |
| ENSG00000162772 | ATF3           | activating transcription factor 3                          | 0,4452  | 1,3615 | 0,0001 | 0,0013 |
| ENSG00000169136 | ATF5           | activating transcription factor 5                          | -0,4502 | 0,7319 | 0,0000 | 0,0001 |
| ENSG00000085978 | ATG16L1        | autophagy related 16-like 1                                | -0,4555 | 0,7293 | 0,0000 | 0,0000 |
| ENSG00000168010 | ATG16L2        | autophagy related 16-like 2                                | 0,7844  | 1,7224 | 0,0000 | 0,0000 |
| ENSG00000110046 | ATG2A          | autophagy related 2A                                       | 0,6339  | 1,5517 | 0,0000 | 0,0001 |
| ENSG00000130734 | ATG4D          | autophagy related 4D, cysteine peptidase                   | 0,5576  | 1,4719 | 0,0000 | 0,0006 |
| ENSG00000198925 | ATG9A          | autophagy related 9A                                       | 0,4025  | 1,3218 | 0,0001 | 0,0009 |
| ENSG00000181652 | ATG9B          | autophagy related 9B                                       | 0,9701  | 1,9590 | 0,0004 | 0,0039 |
| ENSG00000142102 | ATHL1          | ATH1, acid trehalase-like 1 (yeast)                        | 1,3195  | 2,4957 | 0,0000 | 0,0000 |
| ENSG00000168874 | ATOH8          | atonal bHLH transcription factor 8                         | -0,9453 | 0,5193 | 0,0005 | 0,0054 |
| ENSG00000068650 | ATP11A         | ATPase, class VI, type 11A                                 | -0,7818 | 0,5816 | 0,0000 | 0,0000 |
| ENSG00000101974 | ATP11C         | ATPase, class VI, type 11C                                 | -0,4048 | 0,7553 | 0,0000 | 0,0001 |
| ENSG00000133657 | ATP13A3        | ATPase type 13A3                                           | -0,4513 | 0,7314 | 0,0000 | 0,0000 |

|                 |          |                                                                     |         |        |        |        |
|-----------------|----------|---------------------------------------------------------------------|---------|--------|--------|--------|
| ENSG00000069849 | ATP1B3   | ATPase, Na+/K+ transporting, beta 3 polypeptide                     | -0,4656 | 0,7242 | 0,0000 | 0,0001 |
| ENSG00000074370 | ATP2A3   | ATPase, Ca++ transporting, ubiquitous                               | 0,5389  | 1,4528 | 0,0008 | 0,0073 |
| ENSG00000070961 | ATP2B1   | ATPase, Ca++ transporting, plasma membrane 1                        | -0,5324 | 0,6914 | 0,0000 | 0,0000 |
| ENSG00000058668 | ATP2B4   | ATPase, Ca++ transporting, plasma membrane 4                        | -0,7507 | 0,5943 | 0,0000 | 0,0000 |
| ENSG00000185344 | ATP6V0A2 | ATPase, H+ transporting, lysosomal V0 subunit a2                    | -0,5071 | 0,7036 | 0,0000 | 0,0000 |
| ENSG00000100554 | ATP6V1D  | ATPase, H+ transporting, lysosomal 34kDa, V1 subunit D              | -0,7083 | 0,6120 | 0,0000 | 0,0000 |
| ENSG00000132932 | ATP8A2   | ATPase, aminophospholipid transporter, class I, type 8A, member 2   | -0,7041 | 0,6138 | 0,0000 | 0,0001 |
| ENSG00000081923 | ATP8B1   | ATPase, aminophospholipid transporter, class I, type 8B, member 1   | 0,9297  | 1,9049 | 0,0000 | 0,0002 |
| ENSG00000107518 | ATRNL1   | attractin-like 1                                                    | -0,8990 | 0,5362 | 0,0000 | 0,0005 |
| ENSG00000124788 | ATXN1    | ataxin 1                                                            | 0,4086  | 1,3274 | 0,0000 | 0,0000 |
| ENSG00000130638 | ATXN10   | ataxin 10                                                           | -0,4150 | 0,7500 | 0,0000 | 0,0007 |
| ENSG00000168488 | ATXN2L   | ataxin 2-like                                                       | 0,3837  | 1,3047 | 0,0000 | 0,0001 |
| ENSG00000160862 | AZGP1    | alpha-2-glycoprotein 1, zinc-binding                                | 2,1983  | 4,5893 | 0,0000 | 0,0000 |
| ENSG00000214313 | AZGP1P1  | alpha-2-glycoprotein 1, zinc-binding pseudogene 1                   | 0,9457  | 1,9261 | 0,0005 | 0,0049 |
| ENSG00000142920 | AZIN2    | antizyme inhibitor 2                                                | 0,7218  | 1,6493 | 0,0000 | 0,0002 |
| ENSG00000187676 | B3GLCT   | beta 3-glucosyltransferase                                          | -0,7856 | 0,5801 | 0,0000 | 0,0000 |
| ENSG00000182272 | B4GALNT4 | beta-1,4-N-acetyl-galactosaminyl transferase 4                      | 0,4496  | 1,3656 | 0,0009 | 0,0089 |
| ENSG00000118276 | B4GALT6  | UDP-Gal:betaGlcNAc beta 1,4- galactosyltransferase, polypeptide 6   | -0,7881 | 0,5791 | 0,0000 | 0,0000 |
| ENSG00000108641 | B9D1     | B9 protein domain 1                                                 | 0,4437  | 1,3601 | 0,0001 | 0,0009 |
| ENSG00000112182 | BACH2    | BTB and CNC homology 1, basic leucine zipper transcription factor 2 | 1,2665  | 2,4057 | 0,0000 | 0,0000 |
| ENSG00000002330 | BAD      | BCL2-associated agonist of cell death                               | 0,4269  | 1,3444 | 0,0005 | 0,0054 |
| ENSG00000107262 | BAG1     | BCL2-associated athanogene                                          | -0,4096 | 0,7528 | 0,0001 | 0,0008 |
| ENSG00000166170 | BAG5     | BCL2-associated athanogene 5                                        | -0,5979 | 0,6607 | 0,0000 | 0,0000 |
| ENSG00000007516 | BAIAP3   | BAI1-associated protein 3                                           | 1,6897  | 3,2259 | 0,0000 | 0,0000 |
| ENSG00000198604 | BAZ1A    | bromodomain adjacent to zinc finger domain, 1A                      | -0,5942 | 0,6624 | 0,0000 | 0,0000 |
| ENSG00000105327 | BBC3     | BCL2 binding component 3                                            | 1,0598  | 2,0847 | 0,0000 | 0,0000 |
| ENSG00000125124 | BBS2     | Bardet-Biedl syndrome 2                                             | 0,6778  | 1,5998 | 0,0000 | 0,0000 |
| ENSG00000075790 | BCAP29   | B-cell receptor-associated protein 29                               | -0,5519 | 0,6821 | 0,0000 | 0,0000 |
| ENSG00000141376 | BCAS3    | breast carcinoma amplified sequence 3                               | 0,9892  | 1,9852 | 0,0000 | 0,0000 |
| ENSG00000105552 | BCAT2    | branched chain amino-acid transaminase 2, mitochondrial             | 0,5445  | 1,4585 | 0,0000 | 0,0000 |
| ENSG00000107949 | BCCIP    | BRCA2 and CDKN1A interacting protein                                | -0,5674 | 0,6748 | 0,0000 | 0,0000 |

|                 |         |                                                        |         |        |        |        |
|-----------------|---------|--------------------------------------------------------|---------|--------|--------|--------|
| ENSG00000171791 | BCL2    | B-cell CLL/lymphoma 2                                  | -0,6384 | 0,6424 | 0,0008 | 0,0074 |
| ENSG00000188761 | BCL2L15 | BCL2-like 15                                           | -0,7614 | 0,5899 | 0,0000 | 0,0000 |
| ENSG00000113916 | BCL6    | B-cell CLL/lymphoma 6                                  | 0,6041  | 1,5201 | 0,0000 | 0,0006 |
| ENSG00000029363 | BCLAF1  | BCL2-associated transcription factor 1                 | -0,5084 | 0,7030 | 0,0000 | 0,0000 |
| ENSG00000236824 | BCYRN1  | brain cytoplasmic RNA 1                                | -0,6137 | 0,6535 | 0,0000 | 0,0000 |
| ENSG00000166546 | BEAN1   | brain expressed, associated with NEDD4, 1              | 0,9831  | 1,9767 | 0,0000 | 0,0000 |
| ENSG00000178409 | BEND3   | BEN domain containing 3                                | -0,3852 | 0,7657 | 0,0002 | 0,0020 |
| ENSG00000167995 | BEST1   | bestrophin 1                                           | 1,5486  | 2,9253 | 0,0000 | 0,0000 |
| ENSG00000133134 | BEX2    | brain expressed X-linked 2                             | 0,6881  | 1,6112 | 0,0000 | 0,0000 |
| ENSG00000180535 | BHLHA15 | basic helix-loop-helix family, member a15              | 0,9417  | 1,9208 | 0,0003 | 0,0034 |
| ENSG00000134107 | BHLHE40 | basic helix-loop-helix family, member e40              | 0,4846  | 1,3992 | 0,0000 | 0,0000 |
| ENSG00000123095 | BHLHE41 | basic helix-loop-helix family, member e41              | 1,3451  | 2,5404 | 0,0000 | 0,0000 |
| ENSG00000237452 | BHMG1   | basic helix-loop-helix and HMG box domain containing 1 | 0,9173  | 1,8886 | 0,0008 | 0,0080 |
| ENSG00000122870 | BICC1   | BicC family RNA binding protein 1                      | -0,6061 | 0,6570 | 0,0000 | 0,0000 |
| ENSG00000100290 | BIK     | BCL2-interacting killer (apoptosis-inducing)           | 0,4901  | 1,4046 | 0,0000 | 0,0001 |
| ENSG00000147439 | BIN3    | bridging integrator 3                                  | -0,4138 | 0,7506 | 0,0001 | 0,0012 |
| ENSG00000023445 | BIRC3   | baculoviral IAP repeat containing 3                    | -1,2393 | 0,4236 | 0,0000 | 0,0000 |
| ENSG00000089685 | BIRC5   | baculoviral IAP repeat containing 5                    | -0,4429 | 0,7357 | 0,0000 | 0,0001 |
| ENSG00000134897 | BIVM    | basic, immunoglobulin-like variable motif containing   | -0,9083 | 0,5328 | 0,0000 | 0,0000 |
| ENSG00000166619 | BLCAP   | bladder cancer associated protein                      | -0,5619 | 0,6774 | 0,0000 | 0,0000 |
| ENSG00000090013 | BLVRB   | biliverdin reductase B                                 | 0,3794  | 1,3008 | 0,0008 | 0,0079 |
| ENSG00000104081 | BMF     | Bcl2 modifying factor                                  | 1,0558  | 2,0788 | 0,0000 | 0,0000 |
| ENSG00000168283 | BMI1    | BMI1 proto-oncogene, polycomb ring finger              | -0,5143 | 0,7001 | 0,0000 | 0,0000 |
| ENSG00000125378 | BMP4    | bone morphogenetic protein 4                           | -0,5273 | 0,6938 | 0,0000 | 0,0000 |
| ENSG00000153162 | BMP6    | bone morphogenetic protein 6                           | -0,6584 | 0,6336 | 0,0000 | 0,0000 |
| ENSG00000116985 | BMP8B   | bone morphogenetic protein 8b                          | 0,7223  | 1,6498 | 0,0000 | 0,0000 |
| ENSG00000138696 | BMPR1B  | bone morphogenetic protein receptor, type IB           | 1,0816  | 2,1164 | 0,0000 | 0,0005 |
| ENSG00000165733 | BMS1    | BMS1 ribosome biogenesis factor                        | -0,5357 | 0,6898 | 0,0000 | 0,0000 |
| ENSG00000173068 | BNC2    | basonuclin 2                                           | -0,4681 | 0,7229 | 0,0001 | 0,0017 |
| ENSG00000178096 | BOLA1   | bolA family member 1                                   | 0,6953  | 1,6193 | 0,0000 | 0,0001 |
| ENSG00000136122 | BORA    | bora, aurora kinase A activator                        | -1,1942 | 0,4370 | 0,0000 | 0,0000 |



|                 |            |                                                           |         |        |        |        |
|-----------------|------------|-----------------------------------------------------------|---------|--------|--------|--------|
| ENSG00000139618 | BRCA2      | breast cancer 2, early onset                              | -0,4309 | 0,7418 | 0,0000 | 0,0000 |
| ENSG00000185515 | BRCC3      | BRCA1/BRCA2-containing complex, subunit 3                 | -0,4813 | 0,7163 | 0,0000 | 0,0000 |
| ENSG00000113460 | BRIX1      | BRX1, biogenesis of ribosomes                             | -0,6326 | 0,6450 | 0,0000 | 0,0000 |
| ENSG00000160058 | BSDC1      | BSD domain containing 1                                   | 0,4583  | 1,3740 | 0,0000 | 0,0000 |
| ENSG00000151136 | BTBD11     | BTB (POZ) domain containing 11                            | -0,6197 | 0,6508 | 0,0000 | 0,0000 |
| ENSG00000133243 | BTBD2      | BTB (POZ) domain containing 2                             | 0,5237  | 1,4376 | 0,0003 | 0,0036 |
| ENSG00000183826 | BTBD9      | BTB (POZ) domain containing 9                             | 0,5195  | 1,4334 | 0,0000 | 0,0000 |
| ENSG00000159388 | BTG2       | BTG family, member 2                                      | 0,5572  | 1,4714 | 0,0000 | 0,0000 |
| ENSG00000026950 | BTN3A1     | butyrophilin, subfamily 3, member A1                      | 1,3713  | 2,5869 | 0,0000 | 0,0000 |
| ENSG00000186470 | BTN3A2     | butyrophilin, subfamily 3, member A2                      | 0,9406  | 1,9193 | 0,0000 | 0,0000 |
| ENSG00000111801 | BTN3A3     | butyrophilin, subfamily 3, member A3                      | 1,3740  | 2,5918 | 0,0000 | 0,0000 |
| ENSG00000005379 | BZRAP1     | benzodiazepine receptor (peripheral) associated protein 1 | 0,9743  | 1,9647 | 0,0000 | 0,0000 |
| ENSG00000265148 | BZRAP1-AS1 | BZRAP1 antisense RNA 1                                    | 0,8624  | 1,8181 | 0,0000 | 0,0001 |
| ENSG00000082153 | BZW1       | basic leucine zipper and W2 domains 1                     | -0,6400 | 0,6417 | 0,0000 | 0,0000 |
| ENSG00000136261 | BZW2       | basic leucine zipper and W2 domains 2                     | -0,4394 | 0,7375 | 0,0000 | 0,0002 |
| ENSG00000171224 | C10orf35   | chromosome 10 open reading frame 35                       | 0,4283  | 1,3456 | 0,0002 | 0,0026 |
| ENSG00000107738 | C10orf54   | chromosome 10 open reading frame 54                       | 0,4221  | 1,3399 | 0,0008 | 0,0080 |
| ENSG00000165863 | C10orf82   | chromosome 10 open reading frame 82                       | 1,1893  | 2,2804 | 0,0000 | 0,0000 |
| ENSG00000211450 | C11orf31   | chromosome 11 open reading frame 31                       | 0,3832  | 1,3043 | 0,0001 | 0,0012 |
| ENSG00000182919 | C11orf54   | chromosome 11 open reading frame 54                       | 0,4750  | 1,3899 | 0,0000 | 0,0000 |
| ENSG00000175573 | C11orf68   | chromosome 11 open reading frame 68                       | 0,7047  | 1,6298 | 0,0000 | 0,0000 |
| ENSG00000180425 | C11orf71   | chromosome 11 open reading frame 71                       | 0,8895  | 1,8525 | 0,0000 | 0,0000 |
| ENSG00000170270 | C14orf142  | chromosome 14 open reading frame 142                      | -0,5738 | 0,6718 | 0,0000 | 0,0000 |
| ENSG00000170468 | C14orf169  | chromosome 14 open reading frame 169                      | -0,6213 | 0,6501 | 0,0000 | 0,0000 |
| ENSG00000179476 | C14orf28   | chromosome 14 open reading frame 28                       | 0,5459  | 1,4599 | 0,0006 | 0,0062 |
| ENSG00000185716 | C16orf52   | chromosome 16 open reading frame 52                       | -0,4463 | 0,7339 | 0,0000 | 0,0000 |
| ENSG00000140688 | C16orf58   | chromosome 16 open reading frame 58                       | 0,4253  | 1,3428 | 0,0001 | 0,0010 |
| ENSG00000162062 | C16orf59   | chromosome 16 open reading frame 59                       | 0,5804  | 1,4953 | 0,0000 | 0,0000 |
| ENSG00000103544 | C16orf62   | chromosome 16 open reading frame 62                       | -0,3995 | 0,7581 | 0,0005 | 0,0048 |
| ENSG00000154102 | C16orf74   | chromosome 16 open reading frame 74                       | 0,6752  | 1,5968 | 0,0002 | 0,0029 |
| ENSG00000273604 | C17orf96   | chromosome 17 open reading frame 96                       | -0,3970 | 0,7594 | 0,0000 | 0,0002 |

|                 |               |                                                 |         |        |        |        |
|-----------------|---------------|-------------------------------------------------|---------|--------|--------|--------|
| ENSG00000130813 | C19orf66      | chromosome 19 open reading frame 66             | 0,4467  | 1,3629 | 0,0005 | 0,0055 |
| ENSG00000174917 | C19orf70      | chromosome 19 open reading frame 70             | 0,4638  | 1,3792 | 0,0002 | 0,0027 |
| ENSG00000163362 | C1orf106      | chromosome 1 open reading frame 106             | -0,6154 | 0,6528 | 0,0000 | 0,0000 |
| ENSG00000253313 | C1orf210      | chromosome 1 open reading frame 210             | 0,8874  | 1,8498 | 0,0000 | 0,0000 |
| ENSG00000142686 | C1orf216      | chromosome 1 open reading frame 216             | -0,5164 | 0,6991 | 0,0000 | 0,0000 |
| ENSG00000133466 | C1QTNF6       | C1q and tumor necrosis factor related protein 6 | 0,5641  | 1,4784 | 0,0000 | 0,0002 |
| ENSG00000205861 | C1QTNF9B-AS1  | C1QTNF9B antisense RNA 1                        | -0,8770 | 0,5445 | 0,0000 | 0,0000 |
| ENSG00000174403 | C20orf166-AS1 | C20orf166 antisense RNA 1                       | 1,2399  | 2,3618 | 0,0000 | 0,0001 |
| ENSG00000125531 | C20orf195     | chromosome 20 open reading frame 195            | 0,6816  | 1,6039 | 0,0000 | 0,0006 |
| ENSG00000101084 | C20orf24      | chromosome 20 open reading frame 24             | -0,4194 | 0,7478 | 0,0001 | 0,0018 |
| ENSG00000160298 | C21orf58      | chromosome 21 open reading frame 58             | 0,4680  | 1,3832 | 0,0000 | 0,0004 |
| ENSG00000172478 | C2orf54       | chromosome 2 open reading frame 54              | 0,5141  | 1,4281 | 0,0000 | 0,0002 |
| ENSG00000168887 | C2orf68       | chromosome 2 open reading frame 68              | 0,4171  | 1,3352 | 0,0000 | 0,0000 |
| ENSG00000187833 | C2orf78       | chromosome 2 open reading frame 78              | 0,6734  | 1,5948 | 0,0001 | 0,0009 |
| ENSG00000159239 | C2orf81       | chromosome 2 open reading frame 81              | 0,6860  | 1,6088 | 0,0000 | 0,0000 |
| ENSG00000125730 | C3            | complement component 3                          | -1,1451 | 0,4522 | 0,0000 | 0,0000 |
| ENSG00000088543 | C3orf18       | chromosome 3 open reading frame 18              | 0,4412  | 1,3577 | 0,0002 | 0,0022 |
| ENSG00000114529 | C3orf52       | chromosome 3 open reading frame 52              | -0,7652 | 0,5884 | 0,0000 | 0,0000 |
| ENSG00000187068 | C3orf70       | chromosome 3 open reading frame 70              | -1,3734 | 0,3860 | 0,0000 | 0,0000 |
| ENSG00000174749 | C4orf32       | chromosome 4 open reading frame 32              | -0,3804 | 0,7682 | 0,0003 | 0,0032 |
| ENSG00000186577 | C6orf1        | chromosome 6 open reading frame 1               | 0,6895  | 1,6127 | 0,0000 | 0,0000 |
| ENSG00000204542 | C6orf15       | chromosome 6 open reading frame 15              | 1,1432  | 2,2087 | 0,0000 | 0,0001 |
| ENSG00000181577 | C6orf223      | chromosome 6 open reading frame 223             | 0,8645  | 1,8207 | 0,0000 | 0,0000 |
| ENSG00000213563 | C8orf82       | chromosome 8 open reading frame 82              | 0,4499  | 1,3659 | 0,0006 | 0,0063 |
| ENSG00000232434 | C9orf172      | chromosome 9 open reading frame 172             | 0,8424  | 1,7930 | 0,0000 | 0,0001 |
| ENSG00000275549 | C9orf173-AS1  | C9orf173 antisense RNA 1                        | 1,3190  | 2,4949 | 0,0000 | 0,0000 |
| ENSG00000135045 | C9orf40       | chromosome 9 open reading frame 40              | -0,4981 | 0,7080 | 0,0000 | 0,0005 |
| ENSG00000165698 | C9orf9        | chromosome 9 open reading frame 9               | 0,7098  | 1,6356 | 0,0001 | 0,0014 |
| ENSG00000063180 | CA11          | carbonic anhydrase XI                           | 0,5885  | 1,5037 | 0,0000 | 0,0001 |
| ENSG00000185015 | CA13          | carbonic anhydrase XIII                         | -0,8995 | 0,5361 | 0,0001 | 0,0017 |
| ENSG00000107159 | CA9           | carbonic anhydrase IX                           | 1,7022  | 3,2540 | 0,0000 | 0,0000 |

|                 |          |                                                              |         |        |        |        |
|-----------------|----------|--------------------------------------------------------------|---------|--------|--------|--------|
| ENSG00000134508 | CABLES1  | Cdk5 and Abl enzyme substrate 1                              | 0,7531  | 1,6854 | 0,0000 | 0,0000 |
| ENSG00000149679 | CABLES2  | Cdk5 and Abl enzyme substrate 2                              | 0,4027  | 1,3220 | 0,0001 | 0,0016 |
| ENSG00000160325 | CACFD1   | calcium channel flower domain containing 1                   | 1,2847  | 2,4363 | 0,0000 | 0,0000 |
| ENSG00000157388 | CACNA1D  | calcium channel, voltage-dependent, L type, alpha 1D subunit | 0,7027  | 1,6276 | 0,0000 | 0,0001 |
| ENSG00000198216 | CACNA1E  | calcium channel, voltage-dependent, R type, alpha 1E subunit | 2,0563  | 4,1591 | 0,0000 | 0,0000 |
| ENSG00000102001 | CACNA1F  | calcium channel, voltage-dependent, L type, alpha 1F subunit | 1,7595  | 3,3858 | 0,0000 | 0,0000 |
| ENSG00000196557 | CACNA1H  | calcium channel, voltage-dependent, T type, alpha 1H subunit | 1,3798  | 2,6022 | 0,0000 | 0,0000 |
| ENSG00000100346 | CACNA1I  | calcium channel, voltage-dependent, T type, alpha 1I subunit | 1,4546  | 2,7409 | 0,0000 | 0,0000 |
| ENSG00000081248 | CACNA1S  | calcium channel, voltage-dependent, L type, alpha 1S subunit | 0,7362  | 1,6657 | 0,0000 | 0,0000 |
| ENSG00000151062 | CACNA2D4 | calcium channel, voltage-dependent, alpha 2/delta subunit 4  | 0,4109  | 1,3295 | 0,0000 | 0,0002 |
| ENSG00000182389 | CACNB4   | calcium channel, voltage-dependent, beta 4 subunit           | -0,5597 | 0,6785 | 0,0000 | 0,0000 |
| ENSG00000130433 | CACNG6   | calcium channel, voltage-dependent, gamma subunit 6          | 0,6832  | 1,6057 | 0,0000 | 0,0000 |
| ENSG00000142408 | CACNG8   | calcium channel, voltage-dependent, gamma subunit 8          | -0,5849 | 0,6667 | 0,0001 | 0,0016 |
| ENSG00000185933 | CALHM1   | calcium homeostasis modulator 1                              | 1,8135  | 3,5149 | 0,0000 | 0,0000 |
| ENSG00000138172 | CALHM2   | calcium homeostasis modulator 2                              | 0,3789  | 1,3003 | 0,0006 | 0,0062 |
| ENSG00000183128 | CALHM3   | calcium homeostasis modulator 3                              | 0,8938  | 1,8581 | 0,0000 | 0,0000 |
| ENSG00000198668 | CALM1    | calmodulin 1 (phosphorylase kinase, delta)                   | -0,6807 | 0,6239 | 0,0000 | 0,0000 |
| ENSG00000143933 | CALM2    | calmodulin 2 (phosphorylase kinase, delta)                   | -0,5114 | 0,7015 | 0,0000 | 0,0000 |
| ENSG00000152495 | CAMK4    | calcium/calmodulin-dependent protein kinase IV               | 1,7615  | 3,3905 | 0,0000 | 0,0000 |
| ENSG00000004660 | CAMKK1   | calcium/calmodulin-dependent protein kinase kinase 1, alpha  | 0,8490  | 1,8013 | 0,0000 | 0,0000 |
| ENSG00000108509 | CAMTA2   | calmodulin binding transcription activator 2                 | 0,4614  | 1,3769 | 0,0000 | 0,0007 |
| ENSG00000042493 | CAPG     | capping protein (actin filament), gelsolin-like              | 0,3793  | 1,3007 | 0,0004 | 0,0046 |
| ENSG00000182472 | CAPN12   | calpain 12                                                   | 0,5919  | 1,5072 | 0,0000 | 0,0001 |
| ENSG00000162909 | CAPN2    | calpain 2, (m/II) large subunit                              | -0,5006 | 0,7068 | 0,0000 | 0,0000 |
| ENSG00000116489 | CAPZA1   | capping protein (actin filament) muscle Z-line, alpha 1      | -0,5077 | 0,7033 | 0,0000 | 0,0000 |
| ENSG00000165233 | CARD19   | caspase recruitment domain family, member 19                 | 0,5055  | 1,4196 | 0,0000 | 0,0002 |
| ENSG00000105483 | CARD8    | caspase recruitment domain family, member 8                  | 0,4592  | 1,3748 | 0,0000 | 0,0000 |
| ENSG00000138380 | CARF     | calcium responsive transcription factor                      | 0,3870  | 1,3077 | 0,0009 | 0,0089 |
| ENSG00000213995 | CARKD    | carbohydrate kinase domain containing                        | -0,5667 | 0,6752 | 0,0000 | 0,0000 |
| ENSG00000156017 | CARNMT1  | carnosine N-methyltransferase 1                              | -0,4077 | 0,7538 | 0,0000 | 0,0001 |
| ENSG00000172508 | CARNS1   | carnosine synthase 1                                         | 1,6549  | 3,1489 | 0,0000 | 0,0000 |

|                 |           |                                                           |         |        |        |        |
|-----------------|-----------|-----------------------------------------------------------|---------|--------|--------|--------|
| ENSG00000110619 | CARS      | cysteinyl-tRNA synthetase                                 | 0,5797  | 1,4946 | 0,0000 | 0,0000 |
| ENSG00000134905 | CARS2     | cysteinyl-tRNA synthetase 2, mitochondrial (putative)     | -0,8979 | 0,5367 | 0,0000 | 0,0000 |
| ENSG00000204682 | CASC10    | cancer susceptibility candidate 10                        | -0,5794 | 0,6692 | 0,0000 | 0,0001 |
| ENSG00000167971 | CASKIN1   | CASK interacting protein 1                                | 0,8877  | 1,8503 | 0,0005 | 0,0053 |
| ENSG00000196954 | CASP4     | caspase 4, apoptosis-related cysteine peptidase           | -1,2772 | 0,4126 | 0,0000 | 0,0000 |
| ENSG00000121691 | CAT       | catalase                                                  | 0,3959  | 1,3158 | 0,0000 | 0,0000 |
| ENSG00000159231 | CBR3      | carbonyl reductase 3                                      | -0,5523 | 0,6819 | 0,0000 | 0,0000 |
| ENSG00000160200 | CBS       | cystathionine-beta-synthase                               | 1,1315  | 2,1908 | 0,0000 | 0,0000 |
| ENSG00000122565 | CBX3      | chromobox homolog 3                                       | -0,5269 | 0,6940 | 0,0000 | 0,0000 |
| ENSG00000141582 | CBX4      | chromobox homolog 4                                       | 0,3868  | 1,3075 | 0,0004 | 0,0043 |
| ENSG00000100307 | CBX7      | chromobox homolog 7                                       | 0,7172  | 1,6440 | 0,0000 | 0,0000 |
| ENSG00000060339 | CCAR1     | cell division cycle and apoptosis regulator 1             | -0,4437 | 0,7353 | 0,0000 | 0,0000 |
| ENSG00000171097 | CCBL1     | cysteine conjugate-beta lyase, cytoplasmic                | 0,8527  | 1,8058 | 0,0000 | 0,0000 |
| ENSG00000159884 | CCDC107   | coiled-coil domain containing 107                         | 0,5531  | 1,4672 | 0,0000 | 0,0000 |
| ENSG00000168491 | CCDC110   | coiled-coil domain containing 110                         | 0,5011  | 1,4153 | 0,0005 | 0,0055 |
| ENSG00000103021 | CCDC113   | coiled-coil domain containing 113                         | 0,9242  | 1,8976 | 0,0000 | 0,0000 |
| ENSG00000176714 | CCDC121   | coiled-coil domain containing 121                         | 0,9275  | 1,9020 | 0,0000 | 0,0000 |
| ENSG00000104957 | CCDC130   | coiled-coil domain containing 130                         | 0,4014  | 1,3207 | 0,0008 | 0,0078 |
| ENSG00000205212 | CCDC144NL | coiled-coil domain containing 144 family, N-terminal like | 1,1809  | 2,2671 | 0,0000 | 0,0000 |
| ENSG00000144395 | CCDC150   | coiled-coil domain containing 150                         | -0,5827 | 0,6677 | 0,0000 | 0,0002 |
| ENSG00000248712 | CCDC153   | coiled-coil domain containing 153                         | 0,9929  | 1,9901 | 0,0000 | 0,0000 |
| ENSG00000120262 | CCDC170   | coiled-coil domain containing 170                         | 0,6034  | 1,5193 | 0,0000 | 0,0000 |
| ENSG00000122483 | CCDC18    | coiled-coil domain containing 18                          | -0,5146 | 0,7000 | 0,0000 | 0,0000 |
| ENSG00000197816 | CCDC180   | coiled-coil domain containing 180                         | 0,9032  | 1,8702 | 0,0010 | 0,0093 |
| ENSG00000234409 | CCDC188   | coiled-coil domain containing 188                         | 0,9928  | 1,9900 | 0,0002 | 0,0019 |
| ENSG00000163617 | CCDC191   | coiled-coil domain containing 191                         | 0,9651  | 1,9521 | 0,0000 | 0,0005 |
| ENSG0000024862  | CCDC28A   | coiled-coil domain containing 28A                         | 0,5547  | 1,4688 | 0,0000 | 0,0003 |
| ENSG00000140481 | CCDC33    | coiled-coil domain containing 33                          | 2,6405  | 6,2354 | 0,0000 | 0,0000 |
| ENSG00000133773 | CCDC59    | coiled-coil domain containing 59                          | -0,4218 | 0,7465 | 0,0003 | 0,0039 |
| ENSG00000108091 | CCDC6     | coiled-coil domain containing 6                           | -0,3910 | 0,7626 | 0,0000 | 0,0000 |
| ENSG00000104983 | CCDC61    | coiled-coil domain containing 61                          | 0,4423  | 1,3587 | 0,0008 | 0,0076 |

|                 |          |                                                                        |         |        |        |        |
|-----------------|----------|------------------------------------------------------------------------|---------|--------|--------|--------|
| ENSG00000253276 | CCDC71L  | coiled-coil domain containing 71-like                                  | -0,5501 | 0,6830 | 0,0000 | 0,0000 |
| ENSG00000162004 | CCDC78   | coiled-coil domain containing 78                                       | 0,9120  | 1,8816 | 0,0000 | 0,0005 |
| ENSG00000175602 | CCDC85B  | coiled-coil domain containing 85B                                      | 0,8803  | 1,8408 | 0,0001 | 0,0017 |
| ENSG00000142039 | CCDC97   | coiled-coil domain containing 97                                       | 0,3790  | 1,3004 | 0,0001 | 0,0009 |
| ENSG00000204536 | CCHCR1   | coiled-coil alpha-helical rod protein 1                                | 0,5529  | 1,4670 | 0,0000 | 0,0000 |
| ENSG00000106178 | CCL24    | chemokine (C-C motif) ligand 24                                        | 1,2291  | 2,3442 | 0,0000 | 0,0000 |
| ENSG00000006606 | CCL26    | chemokine (C-C motif) ligand 26                                        | 1,1517  | 2,2217 | 0,0000 | 0,0000 |
| ENSG00000151882 | CCL28    | chemokine (C-C motif) ligand 28                                        | 0,8661  | 1,8227 | 0,0000 | 0,0000 |
| ENSG00000134057 | CCNB1    | cyclin B1                                                              | -0,7372 | 0,5999 | 0,0000 | 0,0000 |
| ENSG00000157456 | CCNB2    | cyclin B2                                                              | -0,4405 | 0,7369 | 0,0001 | 0,0010 |
| ENSG00000112237 | CCNC     | cyclin C                                                               | -0,6038 | 0,6580 | 0,0000 | 0,0000 |
| ENSG00000118971 | CCND2    | cyclin D2                                                              | -0,6146 | 0,6531 | 0,0000 | 0,0000 |
| ENSG00000105173 | CCNE1    | cyclin E1                                                              | -0,7977 | 0,5753 | 0,0000 | 0,0000 |
| ENSG00000138764 | CCNG2    | cyclin G2                                                              | 0,8574  | 1,8118 | 0,0000 | 0,0000 |
| ENSG00000107443 | CCNJ     | cyclin J                                                               | -0,4160 | 0,7495 | 0,0000 | 0,0005 |
| ENSG00000260916 | CCPG1    | cell cycle progression 1                                               | 0,6708  | 1,5919 | 0,0000 | 0,0000 |
| ENSG00000173992 | CCS      | copper chaperone for superoxide dismutase                              | 0,4084  | 1,3272 | 0,0001 | 0,0008 |
| ENSG00000166226 | CCT2     | chaperonin containing TCP1, subunit 2 (beta)                           | -0,4564 | 0,7288 | 0,0000 | 0,0001 |
| ENSG00000150753 | CCT5     | chaperonin containing TCP1, subunit 5 (epsilon)                        | -0,5386 | 0,6884 | 0,0000 | 0,0000 |
| ENSG00000146731 | CCT6A    | chaperonin containing TCP1, subunit 6A (zeta 1)                        | -0,4239 | 0,7454 | 0,0000 | 0,0003 |
| ENSG00000122674 | CCZ1     | CCZ1 homolog, vacuolar protein trafficking and biogenesis associated   | -0,4810 | 0,7165 | 0,0000 | 0,0000 |
| ENSG00000146574 | CCZ1B    | CCZ1 homolog B, vacuolar protein trafficking and biogenesis associated | -0,4912 | 0,7114 | 0,0000 | 0,0005 |
| ENSG00000174950 | CD164L2  | CD164 sialomucin-like 2                                                | 1,1224  | 2,1771 | 0,0000 | 0,0001 |
| ENSG00000177455 | CD19     | CD19 molecule                                                          | 1,1835  | 2,2713 | 0,0000 | 0,0002 |
| ENSG00000272398 | CD24     | CD24 molecule                                                          | -0,7318 | 0,6021 | 0,0000 | 0,0000 |
| ENSG00000215039 | CD27-AS1 | CD27 antisense RNA 1                                                   | 0,4117  | 1,3303 | 0,0002 | 0,0020 |
| ENSG00000198087 | CD2AP    | CD2-associated protein                                                 | -0,3893 | 0,7635 | 0,0000 | 0,0002 |
| ENSG00000117877 | CD3EAP   | CD3e molecule, epsilon associated protein                              | -0,8398 | 0,5587 | 0,0000 | 0,0000 |
| ENSG00000169442 | CD52     | CD52 molecule                                                          | 1,0017  | 2,0023 | 0,0000 | 0,0000 |
| ENSG00000085063 | CD59     | CD59 molecule, complement regulatory protein                           | -0,5081 | 0,7031 | 0,0000 | 0,0000 |
| ENSG00000125726 | CD70     | CD70 molecule                                                          | -0,7793 | 0,5827 | 0,0000 | 0,0000 |

|                 |          |                                                                                  |         |        |        |        |
|-----------------|----------|----------------------------------------------------------------------------------|---------|--------|--------|--------|
| ENSG00000085117 | CD82     | CD82 molecule                                                                    | -0,5806 | 0,6687 | 0,0000 | 0,0000 |
| ENSG00000112149 | CD83     | CD83 molecule                                                                    | -0,9964 | 0,5013 | 0,0000 | 0,0000 |
| ENSG00000172116 | CD8B     | CD8b molecule                                                                    | 0,7263  | 1,6543 | 0,0000 | 0,0000 |
| ENSG00000254126 | CD8BP    | CD8b molecule pseudogene                                                         | 0,8090  | 1,7520 | 0,0000 | 0,0000 |
| ENSG00000158825 | CDA      | cytidine deaminase                                                               | 0,7184  | 1,6453 | 0,0000 | 0,0000 |
| ENSG00000140326 | CDAN1    | codanin 1                                                                        | 0,4209  | 1,3388 | 0,0000 | 0,0005 |
| ENSG00000151465 | CDC123   | cell division cycle 123                                                          | -0,4308 | 0,7419 | 0,0000 | 0,0003 |
| ENSG00000130177 | CDC16    | cell division cycle 16                                                           | -0,8897 | 0,5397 | 0,0000 | 0,0000 |
| ENSG00000231007 | CDC20P1  | cell division cycle 20 pseudogene 1                                              | -0,5749 | 0,6713 | 0,0000 | 0,0005 |
| ENSG00000176386 | CDC26    | cell division cycle 26                                                           | -0,4756 | 0,7192 | 0,0000 | 0,0002 |
| ENSG00000149798 | CDC42EP2 | CDC42 effector protein (Rho GTPase binding) 2                                    | -0,4960 | 0,7091 | 0,0000 | 0,0006 |
| ENSG00000234844 | CDC42P2  | cell division cycle 42 pseudogene 2                                              | 1,0990  | 2,1421 | 0,0001 | 0,0008 |
| ENSG00000093009 | CDC45    | cell division cycle 45                                                           | 0,4233  | 1,3410 | 0,0000 | 0,0000 |
| ENSG00000039068 | CDH1     | cadherin 1, type 1                                                               | 0,4603  | 1,3758 | 0,0000 | 0,0001 |
| ENSG00000140937 | CDH11    | cadherin 11, type 2, OB-cadherin (osteoblast)                                    | -1,9811 | 0,2533 | 0,0000 | 0,0000 |
| ENSG00000128536 | CDHR3    | cadherin-related family member 3                                                 | -0,4827 | 0,7157 | 0,0000 | 0,0000 |
| ENSG00000138395 | CDK15    | cyclin-dependent kinase 15                                                       | 0,9761  | 1,9671 | 0,0000 | 0,0000 |
| ENSG00000117266 | CDK18    | cyclin-dependent kinase 18                                                       | 0,8507  | 1,8034 | 0,0000 | 0,0000 |
| ENSG00000167797 | CDK2AP2  | cyclin-dependent kinase 2 associated protein 2                                   | 0,3947  | 1,3147 | 0,0005 | 0,0056 |
| ENSG00000132964 | CDK8     | cyclin-dependent kinase 8                                                        | -0,4119 | 0,7516 | 0,0000 | 0,0001 |
| ENSG00000138769 | CDKL2    | cyclin-dependent kinase-like 2 (CDC2-related kinase)                             | 1,1252  | 2,1814 | 0,0000 | 0,0000 |
| ENSG00000129757 | CDKN1C   | cyclin-dependent kinase inhibitor 1C (p57, Kip2)                                 | 1,0975  | 2,1398 | 0,0000 | 0,0000 |
| ENSG00000147883 | CDKN2B   | cyclin-dependent kinase inhibitor 2B (p15, inhibits CDK4)                        | 0,6413  | 1,5597 | 0,0000 | 0,0000 |
| ENSG00000129355 | CDKN2D   | cyclin-dependent kinase inhibitor 2D (p19, inhibits CDK4)                        | 0,4764  | 1,3912 | 0,0001 | 0,0008 |
| ENSG00000100526 | CDKN3    | cyclin-dependent kinase inhibitor 3                                              | -0,8332 | 0,5613 | 0,0000 | 0,0000 |
| ENSG00000185267 | CDNF     | cerebral dopamine neurotrophic factor                                            | 0,8140  | 1,7581 | 0,0011 | 0,0099 |
| ENSG00000091527 | CDV3     | CDV3 homolog (mouse)                                                             | -0,5754 | 0,6711 | 0,0000 | 0,0000 |
| ENSG00000165556 | CDX2     | caudal type homeobox 2                                                           | -0,6702 | 0,6284 | 0,0000 | 0,0000 |
| ENSG00000079385 | CEACAM1  | carcinoembryonic antigen-related cell adhesion molecule 1 (biliary glycoprotein) | 0,9185  | 1,8902 | 0,0000 | 0,0000 |
| ENSG00000186567 | CEACAM19 | carcinoembryonic antigen-related cell adhesion molecule 19                       | 0,6772  | 1,5990 | 0,0000 | 0,0001 |
| ENSG00000007129 | CEACAM21 | carcinoembryonic antigen-related cell adhesion molecule 21                       | 1,3078  | 2,4757 | 0,0000 | 0,0000 |

|                 |           |                                                            |         |        |        |        |
|-----------------|-----------|------------------------------------------------------------|---------|--------|--------|--------|
| ENSG00000172216 | CEBPB     | CCAAT/enhancer binding protein (C/EBP), beta               | 0,7784  | 1,7152 | 0,0000 | 0,0000 |
| ENSG00000277449 | CEBPB-AS1 | CEBPB antisense RNA 1                                      | 0,8720  | 1,8301 | 0,0000 | 0,0002 |
| ENSG00000115816 | CEBPZ     | CCAAT/enhancer binding protein (C/EBP), zeta               | -0,4522 | 0,7309 | 0,0000 | 0,0001 |
| ENSG00000103888 | CEMIP     | cell migration inducing protein, hyaluronan binding        | 0,4583  | 1,3739 | 0,0000 | 0,0000 |
| ENSG00000138778 | CENPE     | centromere protein E, 312kDa                               | -0,5967 | 0,6613 | 0,0000 | 0,0000 |
| ENSG00000117724 | CENPF     | centromere protein F, 350/400kDa                           | -0,5209 | 0,6969 | 0,0000 | 0,0000 |
| ENSG00000151849 | CENPJ     | centromere protein J                                       | -0,5343 | 0,6905 | 0,0000 | 0,0000 |
| ENSG00000126001 | CEP250    | centrosomal protein 250kDa                                 | 0,4600  | 1,3756 | 0,0000 | 0,0001 |
| ENSG00000106477 | CEP41     | centrosomal protein 41kDa                                  | -0,4436 | 0,7353 | 0,0000 | 0,0003 |
| ENSG00000138180 | CEP55     | centrosomal protein 55kDa                                  | -0,5885 | 0,6650 | 0,0000 | 0,0000 |
| ENSG00000101624 | CEP76     | centrosomal protein 76kDa                                  | -0,5916 | 0,6636 | 0,0000 | 0,0000 |
| ENSG00000173588 | CEP83     | centrosomal protein 83kDa                                  | -0,6353 | 0,6438 | 0,0000 | 0,0000 |
| ENSG00000167123 | CERCAM    | cerebral endothelial cell adhesion molecule                | 0,5031  | 1,4172 | 0,0000 | 0,0000 |
| ENSG00000143418 | CERS2     | ceramide synthase 2                                        | -0,4477 | 0,7332 | 0,0000 | 0,0000 |
| ENSG00000090661 | CERS4     | ceramide synthase 4                                        | 0,8893  | 1,8523 | 0,0000 | 0,0000 |
| ENSG00000172828 | CES3      | carboxylesterase 3                                         | 1,0140  | 2,0195 | 0,0000 | 0,0000 |
| ENSG00000163885 | CFAP100   | cilia and flagella associated protein 100                  | 1,0621  | 2,0880 | 0,0000 | 0,0003 |
| ENSG00000213085 | CFAP45    | cilia and flagella associated protein 45                   | -0,6955 | 0,6175 | 0,0003 | 0,0033 |
| ENSG00000142609 | CFAP74    | cilia and flagella associated protein 74                   | 0,8486  | 1,8008 | 0,0004 | 0,0040 |
| ENSG00000188523 | CFAP77    | cilia and flagella associated protein 77                   | 1,1498  | 2,2188 | 0,0000 | 0,0000 |
| ENSG00000165410 | CFL2      | cofilin 2 (muscle)                                         | -0,4885 | 0,7128 | 0,0000 | 0,0000 |
| ENSG00000143375 | CGN       | cingulin                                                   | -0,5905 | 0,6641 | 0,0000 | 0,0000 |
| ENSG00000128965 | CHAC1     | ChaC glutathione-specific gamma-glutamylcyclotransferase 1 | 1,3993  | 2,6378 | 0,0000 | 0,0000 |
| ENSG00000143942 | CHAC2     | ChaC, cation transport regulator homolog 2 (E. coli)       | -0,5684 | 0,6744 | 0,0000 | 0,0000 |
| ENSG00000198824 | CHAMP1    | chromosome alignment maintaining phosphoprotein 1          | -1,0317 | 0,4891 | 0,0000 | 0,0000 |
| ENSG00000163528 | CHCHD4    | coiled-coil-helix-coiled-coil-helix domain containing 4    | -0,5425 | 0,6866 | 0,0000 | 0,0000 |
| ENSG00000089199 | CHGB      | chromogranin B                                             | -0,6051 | 0,6574 | 0,0011 | 0,0097 |
| ENSG00000115561 | CHMP3     | charged multivesicular body protein 3                      | -0,4546 | 0,7297 | 0,0000 | 0,0001 |
| ENSG00000106069 | CHN2      | chimerin 2                                                 | 0,5499  | 1,4640 | 0,0000 | 0,0006 |
| ENSG00000110172 | CHORDC1   | cysteine and histidine-rich domain (CHORD) containing 1    | -0,5826 | 0,6678 | 0,0000 | 0,0000 |
| ENSG00000135902 | CHRND     | cholinergic receptor, nicotinic, delta (muscle)            | 1,2924  | 2,4493 | 0,0000 | 0,0000 |

|                 |           |                                                                        |         |        |        |        |
|-----------------|-----------|------------------------------------------------------------------------|---------|--------|--------|--------|
| ENSG00000182022 | CHST15    | carbohydrate (N-acetylgalactosamine 4-sulfate 6-O) sulfotransferase 15 | 0,7041  | 1,6291 | 0,0000 | 0,0000 |
| ENSG00000175040 | CHST2     | carbohydrate (N-acetylglucosamine-6-O) sulfotransferase 2              | -0,7413 | 0,5982 | 0,0000 | 0,0004 |
| ENSG00000127586 | CHTF18    | chromosome transmission fidelity factor 18                             | 0,5507  | 1,4647 | 0,0002 | 0,0024 |
| ENSG00000136425 | CIB2      | calcium and integrin binding family member 2                           | 0,5655  | 1,4799 | 0,0010 | 0,0090 |
| ENSG00000079432 | CIC       | capicua transcriptional repressor                                      | 0,4903  | 1,4047 | 0,0003 | 0,0037 |
| ENSG00000198894 | CIPC      | CLOCK-interacting pacemaker                                            | -0,4540 | 0,7300 | 0,0000 | 0,0000 |
| ENSG00000141076 | CIRH1A    | cirrhosis, autosomal recessive 1A (cirhin)                             | -0,5731 | 0,6722 | 0,0000 | 0,0000 |
| ENSG00000136108 | CKAP2     | cytoskeleton associated protein 2                                      | -0,7366 | 0,6002 | 0,0000 | 0,0000 |
| ENSG00000131730 | CKMT2     | creatine kinase, mitochondrial 2 (sarcomeric)                          | -0,3898 | 0,7632 | 0,0000 | 0,0003 |
| ENSG00000247572 | CKMT2-AS1 | CKMT2 antisense RNA 1                                                  | 0,5290  | 1,4429 | 0,0001 | 0,0010 |
| ENSG00000109572 | CLCN3     | chloride channel, voltage-sensitive 3                                  | -0,4641 | 0,7249 | 0,0000 | 0,0000 |
| ENSG00000103249 | CLCN7     | chloride channel, voltage-sensitive 7                                  | 0,4945  | 1,4089 | 0,0002 | 0,0021 |
| ENSG00000163347 | CLDN1     | claudin 1                                                              | 0,4980  | 1,4122 | 0,0000 | 0,0000 |
| ENSG00000165215 | CLDN3     | claudin 3                                                              | 1,2247  | 2,3371 | 0,0000 | 0,0000 |
| ENSG00000189143 | CLDN4     | claudin 4                                                              | 0,4792  | 1,3940 | 0,0000 | 0,0005 |
| ENSG00000181885 | CLDN7     | claudin 7                                                              | 0,4009  | 1,3203 | 0,0000 | 0,0001 |
| ENSG00000213937 | CLDN9     | claudin 9                                                              | 0,7129  | 1,6391 | 0,0002 | 0,0022 |
| ENSG00000113282 | CLINT1    | clathrin interactor 1                                                  | -0,3988 | 0,7585 | 0,0000 | 0,0001 |
| ENSG00000106665 | CLIP2     | CAP-GLY domain containing linker protein 2                             | 0,5332  | 1,4471 | 0,0000 | 0,0006 |
| ENSG00000105270 | CLIP3     | CAP-GLY domain containing linker protein 3                             | 0,9448  | 1,9250 | 0,0000 | 0,0000 |
| ENSG00000115295 | CLIP4     | CAP-GLY domain containing linker protein family, member 4              | 0,9736  | 1,9637 | 0,0000 | 0,0000 |
| ENSG00000165959 | CLMN      | calmin (calponin-like, transmembrane)                                  | 0,7366  | 1,6662 | 0,0000 | 0,0000 |
| ENSG00000102805 | CLN5      | ceroid-lipofuscinosis, neuronal 5                                      | -0,4180 | 0,7485 | 0,0006 | 0,0057 |
| ENSG00000134852 | CLOCK     | clock circadian regulator                                              | -0,4769 | 0,7185 | 0,0000 | 0,0000 |
| ENSG00000172409 | CLP1      | cleavage and polyadenylation factor I subunit 1                        | -0,3812 | 0,7678 | 0,0000 | 0,0005 |
| ENSG00000049656 | CLPTM1L   | CLPTM1-like                                                            | -0,4292 | 0,7427 | 0,0000 | 0,0000 |
| ENSG00000158258 | CLSTN2    | calsyntenin 2                                                          | -0,4243 | 0,7452 | 0,0000 | 0,0000 |
| ENSG00000141367 | CLTC      | clathrin, heavy chain (Hc)                                             | -0,3945 | 0,7608 | 0,0000 | 0,0000 |
| ENSG00000120885 | CLU       | clusterin                                                              | 0,3995  | 1,3190 | 0,0000 | 0,0001 |
| ENSG00000140931 | CMTM3     | CKLF-like MARVEL transmembrane domain containing 3                     | -0,5150 | 0,6998 | 0,0002 | 0,0023 |
| ENSG00000091317 | CMTM6     | CKLF-like MARVEL transmembrane domain containing 6                     | -0,4196 | 0,7477 | 0,0000 | 0,0000 |



|                 |          |                                                                     |         |        |        |        |
|-----------------|----------|---------------------------------------------------------------------|---------|--------|--------|--------|
| ENSG00000153721 | CNKS3    | CNKS3 family member 3                                               | -0,4846 | 0,7147 | 0,0003 | 0,0035 |
| ENSG00000148842 | CNNM2    | cyclin and CBS domain divalent metal cation transport mediator 2    | 0,7477  | 1,6791 | 0,0000 | 0,0000 |
| ENSG00000146910 | CNPY1    | canopy FGF signaling regulator 1                                    | -0,4306 | 0,7420 | 0,0001 | 0,0014 |
| ENSG00000106714 | CNTNAP3  | contactin associated protein-like 3                                 | -1,8209 | 0,2830 | 0,0000 | 0,0000 |
| ENSG00000154529 | CNTNAP3B | contactin associated protein-like 3B                                | -1,3056 | 0,4046 | 0,0000 | 0,0000 |
| ENSG00000162377 | COA7     | cytochrome c oxidase assembly factor 7 (putative)                   | -0,6135 | 0,6536 | 0,0000 | 0,0000 |
| ENSG00000136152 | COG3     | component of oligomeric golgi complex 3                             | -0,4046 | 0,7554 | 0,0000 | 0,0001 |
| ENSG00000197467 | COL13A1  | collagen, type XIII, alpha 1                                        | -0,3919 | 0,7621 | 0,0002 | 0,0027 |
| ENSG00000196739 | COL27A1  | collagen, type XXVII, alpha 1                                       | 0,5994  | 1,5151 | 0,0000 | 0,0002 |
| ENSG00000163359 | COL6A3   | collagen, type VI, alpha 3                                          | -0,9660 | 0,5119 | 0,0000 | 0,0000 |
| ENSG00000114270 | COL7A1   | collagen, type VII, alpha 1                                         | 0,5736  | 1,4882 | 0,0001 | 0,0015 |
| ENSG00000171812 | COL8A2   | collagen, type VIII, alpha 2                                        | 1,3873  | 2,6159 | 0,0000 | 0,0000 |
| ENSG00000093010 | COMT     | catechol-O-methyltransferase                                        | 0,4911  | 1,4055 | 0,0000 | 0,0006 |
| ENSG00000106789 | CORO2A   | coronin, actin binding protein, 2A                                  | 0,5832  | 1,4981 | 0,0000 | 0,0000 |
| ENSG00000103647 | CORO2B   | coronin, actin binding protein, 2B                                  | -0,7590 | 0,5909 | 0,0000 | 0,0000 |
| ENSG00000167549 | CORO6    | coronin 6                                                           | 1,5209  | 2,8696 | 0,0000 | 0,0000 |
| ENSG00000133983 | COX16    | COX16 cytochrome c oxidase assembly homolog                         | -0,4567 | 0,7286 | 0,0000 | 0,0005 |
| ENSG00000160471 | COX6B2   | cytochrome c oxidase subunit VIb polypeptide 2 (testis)             | 0,6349  | 1,5529 | 0,0004 | 0,0041 |
| ENSG00000128510 | CPA4     | carboxypeptidase A4                                                 | 0,6502  | 1,5694 | 0,0004 | 0,0047 |
| ENSG00000160111 | CPAMD8   | C3 and PZP-like, alpha-2-macroglobulin domain containing 8          | 0,8775  | 1,8372 | 0,0003 | 0,0033 |
| ENSG00000107864 | CPEB3    | cytoplasmic polyadenylation element binding protein 3               | 0,7877  | 1,7263 | 0,0000 | 0,0001 |
| ENSG00000145920 | CPLX2    | complexin 2                                                         | -1,2346 | 0,4250 | 0,0000 | 0,0000 |
| ENSG00000178773 | CPNE7    | copine VII                                                          | 0,4842  | 1,3988 | 0,0001 | 0,0013 |
| ENSG00000139117 | CPNE8    | copine VIII                                                         | -1,9172 | 0,2648 | 0,0000 | 0,0000 |
| ENSG00000021826 | CPS1     | carbamoyl-phosphate synthase 1, mitochondrial                       | 1,0521  | 2,0736 | 0,0000 | 0,0000 |
| ENSG00000214076 | CPSF1P1  | cleavage and polyadenylation specific factor 1, 160kDa pseudogene 1 | 0,9246  | 1,8981 | 0,0004 | 0,0043 |
| ENSG00000111605 | CPSF6    | cleavage and polyadenylation specific factor 6, 68kDa               | -0,3965 | 0,7597 | 0,0000 | 0,0000 |
| ENSG00000088882 | CPXM1    | carboxypeptidase X (M14 family), member 1                           | 0,8822  | 1,8432 | 0,0000 | 0,0000 |
| ENSG00000121898 | CPXM2    | carboxypeptidase X (M14 family), member 2                           | 0,8482  | 1,8003 | 0,0001 | 0,0014 |
| ENSG00000177685 | CRACR2B  | calcium release activated channel regulator 2B                      | 0,5617  | 1,4760 | 0,0000 | 0,0007 |
| ENSG00000095321 | CRAT     | carnitine O-acetyltransferase                                       | 0,7735  | 1,7095 | 0,0000 | 0,0000 |

|                 |            |                                                                                   |         |        |        |        |
|-----------------|------------|-----------------------------------------------------------------------------------|---------|--------|--------|--------|
| ENSG00000182158 | CREB3L2    | cAMP responsive element binding protein 3-like 2                                  | 0,5453  | 1,4593 | 0,0000 | 0,0000 |
| ENSG00000143578 | CREB3L4    | cAMP responsive element binding protein 3-like 4                                  | 0,6602  | 1,5803 | 0,0000 | 0,0000 |
| ENSG00000164463 | CREBRF     | CREB3 regulatory factor                                                           | 0,8995  | 1,8654 | 0,0000 | 0,0000 |
| ENSG00000175874 | CREG2      | cellular repressor of E1A-stimulated genes 2                                      | 1,1676  | 2,2463 | 0,0000 | 0,0000 |
| ENSG00000163703 | CRELD1     | cysteine-rich with EGF-like domains 1                                             | 0,5578  | 1,4720 | 0,0001 | 0,0015 |
| ENSG00000182809 | CRIP2      | cysteine-rich protein 2                                                           | 1,2001  | 2,2976 | 0,0000 | 0,0000 |
| ENSG00000167193 | CRK        | v-crk avian sarcoma virus CT10 oncogene homolog                                   | -0,4322 | 0,7412 | 0,0000 | 0,0000 |
| ENSG00000105662 | CRTC1      | CREB regulated transcription coactivator 1                                        | 0,8705  | 1,8283 | 0,0000 | 0,0000 |
| ENSG00000008405 | CRY1       | cryptochrome circadian clock 1                                                    | -0,3829 | 0,7669 | 0,0000 | 0,0003 |
| ENSG00000109846 | CRYAB      | crystallin, alpha B                                                               | 0,9835  | 1,9773 | 0,0002 | 0,0028 |
| ENSG00000165475 | CRYL1      | crystallin, lambda 1                                                              | 0,5249  | 1,4388 | 0,0000 | 0,0000 |
| ENSG00000062485 | CS         | citrate synthase                                                                  | -0,3908 | 0,7627 | 0,0000 | 0,0004 |
| ENSG00000124207 | CSE1L      | CSE1 chromosome segregation 1-like (yeast)                                        | -0,4142 | 0,7504 | 0,0000 | 0,0003 |
| ENSG00000182578 | CSF1R      | colony stimulating factor 1 receptor                                              | 1,0230  | 2,0322 | 0,0002 | 0,0022 |
| ENSG00000147408 | CSGALNACT1 | chondroitin sulfate N-acetylgalactosaminyltransferase 1                           | 0,7736  | 1,7095 | 0,0003 | 0,0029 |
| ENSG00000173546 | CSPG4      | chondroitin sulfate proteoglycan 4                                                | 1,0843  | 2,1203 | 0,0000 | 0,0001 |
| ENSG00000104218 | CSPP1      | centrosome and spindle pole associated protein 1                                  | -0,3789 | 0,7690 | 0,0003 | 0,0032 |
| ENSG00000159176 | CSRP1      | cysteine and glycine-rich protein 1                                               | -0,5184 | 0,6982 | 0,0000 | 0,0000 |
| ENSG00000175183 | CSRP2      | cysteine and glycine-rich protein 2                                               | 0,8680  | 1,8252 | 0,0000 | 0,0000 |
| ENSG00000170373 | CST1       | cystatin SN                                                                       | 1,4750  | 2,7799 | 0,0000 | 0,0000 |
| ENSG00000170369 | CST2       | cystatin SA                                                                       | 1,2618  | 2,3980 | 0,0000 | 0,0000 |
| ENSG00000101441 | CST4       | cystatin S                                                                        | 1,2263  | 2,3396 | 0,0000 | 0,0001 |
| ENSG00000144579 | CTDSP1     | CTD (carboxy-terminal domain, RNA polymerase II, polypeptide A) small phosphatase | 0,4803  | 1,3950 | 0,0000 | 0,0001 |
| ENSG00000116761 | CTH        | cystathionine gamma-lyase                                                         | 0,4153  | 1,3336 | 0,0003 | 0,0034 |
| ENSG00000164932 | CTHRC1     | collagen triple helix repeat containing 1                                         | -0,7022 | 0,6146 | 0,0000 | 0,0000 |
| ENSG00000117984 | CTSD       | cathepsin D                                                                       | 0,4516  | 1,3675 | 0,0004 | 0,0041 |
| ENSG00000103811 | CTSH       | cathepsin H                                                                       | 0,5798  | 1,4946 | 0,0002 | 0,0028 |
| ENSG00000163131 | CTSS       | cathepsin S                                                                       | -1,9192 | 0,2644 | 0,0000 | 0,0000 |
| ENSG00000139842 | CUL4A      | cullin 4A                                                                         | -0,7035 | 0,6141 | 0,0000 | 0,0000 |
| ENSG00000044090 | CUL7       | cullin 7                                                                          | 0,6526  | 1,5720 | 0,0000 | 0,0000 |
| ENSG00000112659 | CUL9       | cullin 9                                                                          | 0,9002  | 1,8663 | 0,0000 | 0,0000 |

|                 |         |                                                              |         |        |        |        |
|-----------------|---------|--------------------------------------------------------------|---------|--------|--------|--------|
| ENSG00000145824 | CXCL14  | chemokine (C-X-C motif) ligand 14                            | -1,0055 | 0,4981 | 0,0000 | 0,0002 |
| ENSG00000121966 | CXCR4   | chemokine (C-X-C motif) receptor 4                           | -0,5394 | 0,6880 | 0,0000 | 0,0000 |
| ENSG00000147231 | CXorf57 | chromosome X open reading frame 57                           | 1,2665  | 2,4058 | 0,0000 | 0,0000 |
| ENSG00000167740 | CYB5D2  | cytochrome b5 domain containing 2                            | 0,5247  | 1,4386 | 0,0000 | 0,0000 |
| ENSG00000172115 | CYCS    | cytochrome c, somatic                                        | -0,5865 | 0,6660 | 0,0000 | 0,0000 |
| ENSG00000273749 | CYFIP1  | cytoplasmic FMR1 interacting protein 1                       | -0,4306 | 0,7420 | 0,0000 | 0,0000 |
| ENSG00000055163 | CYFIP2  | cytoplasmic FMR1 interacting protein 2                       | -0,4039 | 0,7558 | 0,0000 | 0,0004 |
| ENSG00000019186 | CYP24A1 | cytochrome P450, family 24, subfamily A, polypeptide 1       | -0,7944 | 0,5766 | 0,0000 | 0,0000 |
| ENSG00000095596 | CYP26A1 | cytochrome P450, family 26, subfamily A, polypeptide 1       | 1,0468  | 2,0660 | 0,0000 | 0,0000 |
| ENSG00000186115 | CYP4F2  | cytochrome P450, family 4, subfamily F, polypeptide 2        | 0,9643  | 1,9512 | 0,0004 | 0,0047 |
| ENSG00000186529 | CYP4F3  | cytochrome P450, family 4, subfamily F, polypeptide 3        | 1,5087  | 2,8454 | 0,0000 | 0,0000 |
| ENSG00000145476 | CYP4V2  | cytochrome P450, family 4, subfamily V, polypeptide 2        | -0,3842 | 0,7662 | 0,0003 | 0,0031 |
| ENSG00000205795 | CYS1    | cystin 1                                                     | -0,5663 | 0,6754 | 0,0000 | 0,0001 |
| ENSG00000146122 | DAAM2   | dishevelled associated activator of morphogenesis 2          | 1,5167  | 2,8613 | 0,0000 | 0,0000 |
| ENSG00000136848 | DAB2IP  | DAB2 interacting protein                                     | 0,8024  | 1,7440 | 0,0000 | 0,0000 |
| ENSG00000165617 | DACT1   | dishevelled-binding antagonist of beta-catenin 1             | -0,5252 | 0,6949 | 0,0000 | 0,0004 |
| ENSG00000226950 | DANCR   | differentiation antagonizing non-protein coding RNA          | -0,4993 | 0,7075 | 0,0000 | 0,0001 |
| ENSG00000112977 | DAP     | death-associated protein                                     | -0,4921 | 0,7110 | 0,0000 | 0,0000 |
| ENSG00000035664 | DAPK2   | death-associated protein kinase 2                            | 1,0214  | 2,0299 | 0,0000 | 0,0002 |
| ENSG00000006634 | DBF4    | DBF4 zinc finger                                             | -0,6716 | 0,6278 | 0,0000 | 0,0000 |
| ENSG00000123454 | DBH     | dopamine beta-hydroxylase (dopamine beta-monoxygenase)       | 1,5344  | 2,8967 | 0,0000 | 0,0000 |
| ENSG00000225756 | DBH-AS1 | DBH antisense RNA 1                                          | 1,2984  | 2,4595 | 0,0000 | 0,0000 |
| ENSG00000105516 | DBP     | D site of albumin promoter (albumin D-box) binding protein   | 1,4000  | 2,6391 | 0,0000 | 0,0000 |
| ENSG00000164934 | DCAF13  | DDB1 and CUL4 associated factor 13                           | -0,5184 | 0,6981 | 0,0000 | 0,0000 |
| ENSG00000132017 | DCAF15  | DDB1 and CUL4 associated factor 15                           | 0,4126  | 1,3311 | 0,0006 | 0,0062 |
| ENSG00000119599 | DCAF4   | DDB1 and CUL4 associated factor 4                            | -0,5693 | 0,6739 | 0,0000 | 0,0000 |
| ENSG00000057019 | DCBLD2  | discoidin, CUB and LCCL domain containing 2                  | -0,7816 | 0,5817 | 0,0000 | 0,0000 |
| ENSG00000133083 | DCLK1   | doublecortin-like kinase 1                                   | -1,3891 | 0,3818 | 0,0000 | 0,0000 |
| ENSG00000179958 | DCTPP1  | dCTP pyrophosphatase 1                                       | -0,3832 | 0,7667 | 0,0001 | 0,0012 |
| ENSG00000150401 | DCUN1D2 | DCN1, defective in cullin neddylation 1, domain containing 2 | -0,5937 | 0,6626 | 0,0000 | 0,0000 |
| ENSG00000188215 | DCUN1D3 | DCN1, defective in cullin neddylation 1, domain containing 3 | -0,5372 | 0,6891 | 0,0000 | 0,0000 |

|                 |         |                                                              |         |        |        |        |
|-----------------|---------|--------------------------------------------------------------|---------|--------|--------|--------|
| ENSG00000137692 | DCUN1D5 | DCN1, defective in cullin neddylation 1, domain containing 5 | -0,4900 | 0,7120 | 0,0000 | 0,0001 |
| ENSG00000153904 | DDAH1   | dimethylarginine dimethylaminohydrolase 1                    | -0,4365 | 0,7389 | 0,0000 | 0,0002 |
| ENSG00000213722 | DDAH2   | dimethylarginine dimethylaminohydrolase 2                    | 0,7495  | 1,6812 | 0,0000 | 0,0000 |
| ENSG00000175197 | DDIT3   | DNA-damage-inducible transcript 3                            | 1,3983  | 2,6359 | 0,0000 | 0,0000 |
| ENSG00000168209 | DDIT4   | DNA-damage-inducible transcript 4                            | 1,0638  | 2,0904 | 0,0000 | 0,0000 |
| ENSG00000204580 | DDR1    | discoidin domain receptor tyrosine kinase 1                  | 0,5532  | 1,4674 | 0,0000 | 0,0000 |
| ENSG00000079785 | DDX1    | DEAD (Asp-Glu-Ala-Asp) box helicase 1                        | -0,4757 | 0,7191 | 0,0000 | 0,0000 |
| ENSG00000178105 | DDX10   | DEAD (Asp-Glu-Ala-Asp) box polypeptide 10                    | -0,6292 | 0,6465 | 0,0000 | 0,0000 |
| ENSG00000088205 | DDX18   | DEAD (Asp-Glu-Ala-Asp) box polypeptide 18                    | -0,4637 | 0,7251 | 0,0000 | 0,0000 |
| ENSG00000064703 | DDX20   | DEAD (Asp-Glu-Ala-Asp) box polypeptide 20                    | -0,4118 | 0,7517 | 0,0002 | 0,0019 |
| ENSG00000165732 | DDX21   | DEAD (Asp-Glu-Ala-Asp) box helicase 21                       | -0,7437 | 0,5972 | 0,0000 | 0,0000 |
| ENSG00000215301 | DDX3X   | DEAD (Asp-Glu-Ala-Asp) box helicase 3, X-linked              | -0,4353 | 0,7395 | 0,0000 | 0,0000 |
| ENSG00000145833 | DDX46   | DEAD (Asp-Glu-Ala-Asp) box polypeptide 46                    | -0,4171 | 0,7489 | 0,0000 | 0,0000 |
| ENSG00000108654 | DDX5    | DEAD (Asp-Glu-Ala-Asp) box helicase 5                        | -0,4501 | 0,7320 | 0,0000 | 0,0000 |
| ENSG00000164822 | DEFA6   | defensin, alpha 6, Paneth cell-specific                      | 1,0088  | 2,0123 | 0,0002 | 0,0021 |
| ENSG00000198837 | DENND4B | DENN/MADD domain containing 4B                               | 0,4018  | 1,3212 | 0,0000 | 0,0004 |
| ENSG00000170456 | DENND5B | DENN/MADD domain containing 5B                               | 0,4412  | 1,3578 | 0,0001 | 0,0008 |
| ENSG00000035499 | DEPDC1B | DEP domain containing 1B                                     | -0,4014 | 0,7571 | 0,0000 | 0,0005 |
| ENSG00000121690 | DEPDC7  | DEP domain containing 7                                      | 0,4412  | 1,3577 | 0,0000 | 0,0002 |
| ENSG00000155792 | DEPTOR  | DEP domain containing MTOR-interacting protein               | 0,8635  | 1,8194 | 0,0002 | 0,0022 |
| ENSG00000099958 | DERL3   | derlin 3                                                     | 0,8379  | 1,7874 | 0,0000 | 0,0000 |
| ENSG00000175084 | DES     | desmin                                                       | 1,1240  | 2,1796 | 0,0000 | 0,0000 |
| ENSG00000095397 | DFNB31  | deafness, autosomal recessive 31                             | 0,7520  | 1,6841 | 0,0000 | 0,0006 |
| ENSG00000185000 | DGAT1   | diacylglycerol O-acyltransferase 1                           | 0,3849  | 1,3057 | 0,0009 | 0,0083 |
| ENSG00000102780 | DGKH    | diacylglycerol kinase, eta                                   | -0,6068 | 0,6567 | 0,0000 | 0,0000 |
| ENSG00000116133 | DHCR24  | 24-dehydrocholesterol reductase                              | -0,7513 | 0,5941 | 0,0000 | 0,0000 |
| ENSG00000104808 | DHDH    | dihydrodiol dehydrogenase (dimeric)                          | 0,9995  | 1,9993 | 0,0000 | 0,0000 |
| ENSG00000167536 | DHRS13  | dehydrogenase/reductase (SDR family) member 13               | 0,5315  | 1,4455 | 0,0000 | 0,0005 |
| ENSG00000100867 | DHRS2   | dehydrogenase/reductase (SDR family) member 2                | -0,3917 | 0,7622 | 0,0001 | 0,0014 |
| ENSG00000162496 | DHRS3   | dehydrogenase/reductase (SDR family) member 3                | 0,6807  | 1,6030 | 0,0000 | 0,0000 |
| ENSG00000169084 | DHRSX   | dehydrogenase/reductase (SDR family) X-linked                | -0,5161 | 0,6993 | 0,0000 | 0,0003 |

|                 |            |                                                                  |         |        |        |        |
|-----------------|------------|------------------------------------------------------------------|---------|--------|--------|--------|
| ENSG00000109606 | DHX15      | DEAH (Asp-Glu-Ala-His) box helicase 15                           | -0,4643 | 0,7248 | 0,0000 | 0,0000 |
| ENSG00000135829 | DHX9       | DEAH (Asp-Glu-Ala-His) box helicase 9                            | -0,5045 | 0,7049 | 0,0000 | 0,0000 |
| ENSG00000139734 | DIAPH3     | diaphanous-related formin 3                                      | -0,5379 | 0,6888 | 0,0000 | 0,0000 |
| ENSG00000100697 | DICER1     | dicer 1, ribonuclease type III                                   | -0,4706 | 0,7217 | 0,0000 | 0,0000 |
| ENSG00000235706 | DICER1-AS1 | DICER1 antisense RNA 1                                           | 0,5807  | 1,4956 | 0,0001 | 0,0008 |
| ENSG00000165023 | DIRAS2     | DIRAS family, GTP-binding RAS-like 2                             | 1,1778  | 2,2624 | 0,0000 | 0,0000 |
| ENSG00000083520 | DIS3       | DIS3 homolog, exosome endoribonuclease and 3'-5' exoribonuclease | -0,8519 | 0,5540 | 0,0000 | 0,0000 |
| ENSG00000150764 | DIXDC1     | DIX domain containing 1                                          | 0,5331  | 1,4471 | 0,0000 | 0,0001 |
| ENSG00000130826 | DKC1       | dyskeratosis congenita 1, dyskerin                               | -0,6652 | 0,6306 | 0,0000 | 0,0000 |
| ENSG00000050165 | DKK3       | dickkopf WNT signaling pathway inhibitor 3                       | 1,2004  | 2,2981 | 0,0000 | 0,0000 |
| ENSG00000104371 | DKK4       | dickkopf WNT signaling pathway inhibitor 4                       | 1,2665  | 2,4057 | 0,0000 | 0,0000 |
| ENSG00000164741 | DLC1       | DLC1 Rho GTPase activating protein                               | -0,5614 | 0,6777 | 0,0000 | 0,0000 |
| ENSG00000176124 | DLEU1      | deleted in lymphocytic leukemia 1 (non-protein coding)           | -0,8465 | 0,5561 | 0,0000 | 0,0000 |
| ENSG00000231607 | DLEU2      | deleted in lymphocytic leukemia 2 (non-protein coding)           | -0,8256 | 0,5643 | 0,0000 | 0,0000 |
| ENSG00000075711 | DLG1       | discs, large homolog 1 (Drosophila)                              | -0,4733 | 0,7203 | 0,0000 | 0,0000 |
| ENSG00000170579 | DLGAP1     | discs, large (Drosophila) homolog-associated protein 1           | 0,9236  | 1,8969 | 0,0005 | 0,0051 |
| ENSG00000126787 | DLGAP5     | discs, large (Drosophila) homolog-associated protein 5           | -0,5439 | 0,6859 | 0,0000 | 0,0000 |
| ENSG00000128917 | DLL4       | delta-like 4 (Drosophila)                                        | 0,6792  | 1,6012 | 0,0008 | 0,0074 |
| ENSG00000064195 | DLX3       | distal-less homeobox 3                                           | 0,9801  | 1,9726 | 0,0000 | 0,0000 |
| ENSG00000108813 | DLX4       | distal-less homeobox 4                                           | 0,8424  | 1,7931 | 0,0000 | 0,0000 |
| ENSG00000132837 | DMGDH      | dimethylglycine dehydrogenase                                    | 1,1116  | 2,1608 | 0,0000 | 0,0001 |
| ENSG00000165506 | DNAAF2     | dynein, axonemal, assembly factor 2                              | -0,4512 | 0,7314 | 0,0000 | 0,0001 |
| ENSG00000114841 | DNAH1      | dynein, axonemal, heavy chain 1                                  | 0,6791  | 1,6012 | 0,0000 | 0,0001 |
| ENSG00000197653 | DNAH10     | dynein, axonemal, heavy chain 10                                 | 0,8414  | 1,7918 | 0,0005 | 0,0049 |
| ENSG00000158486 | DNAH3      | dynein, axonemal, heavy chain 3                                  | -0,8823 | 0,5425 | 0,0000 | 0,0000 |
| ENSG00000086061 | DNAJA1     | DnaJ (Hsp40) homolog, subfamily A, member 1                      | -0,6202 | 0,6506 | 0,0000 | 0,0000 |
| ENSG00000148719 | DNAJB12    | DnaJ (Hsp40) homolog, subfamily B, member 12                     | 0,6347  | 1,5526 | 0,0000 | 0,0000 |
| ENSG00000128590 | DNAJB9     | DnaJ (Hsp40) homolog, subfamily B, member 9                      | 0,6496  | 1,5688 | 0,0000 | 0,0000 |
| ENSG00000120675 | DNAJC15    | DnaJ (Hsp40) homolog, subfamily C, member 15                     | -0,5289 | 0,6931 | 0,0000 | 0,0000 |
| ENSG00000105821 | DNAJC2     | DnaJ (Hsp40) homolog, subfamily C, member 2                      | -0,8995 | 0,5361 | 0,0000 | 0,0000 |
| ENSG00000059769 | DNAJC25    | DnaJ (Hsp40) homolog, subfamily C , member 25                    | -0,4087 | 0,7533 | 0,0003 | 0,0038 |

|                 |          |                                                                   |         |        |        |        |
|-----------------|----------|-------------------------------------------------------------------|---------|--------|--------|--------|
| ENSG00000115137 | DNAJC27  | DnaJ (Hsp40) homolog, subfamily C, member 27                      | 0,4094  | 1,3281 | 0,0002 | 0,0028 |
| ENSG00000102580 | DNAJC3   | DnaJ (Hsp40) homolog, subfamily C, member 3                       | -0,7331 | 0,6016 | 0,0000 | 0,0000 |
| ENSG00000100246 | DNAL4    | dynein, axonemal, light chain 4                                   | 0,7568  | 1,6897 | 0,0000 | 0,0000 |
| ENSG00000105612 | DNASE2   | deoxyribonuclease II, lysosomal                                   | 0,4931  | 1,4074 | 0,0000 | 0,0000 |
| ENSG00000179532 | DNHD1    | dynein heavy chain domain 1                                       | 0,4344  | 1,3513 | 0,0009 | 0,0088 |
| ENSG00000107554 | DNMBP    | dynamamin binding protein                                         | -0,5075 | 0,7035 | 0,0000 | 0,0000 |
| ENSG00000067334 | DNTTIP2  | deoxynucleotidyltransferase, terminal, interacting protein 2      | -0,4734 | 0,7203 | 0,0000 | 0,0000 |
| ENSG00000149927 | DOC2A    | double C2-like domains, alpha                                     | 1,0402  | 2,0565 | 0,0000 | 0,0000 |
| ENSG00000088538 | DOCK3    | dedicator of cytokinesis 3                                        | 0,4578  | 1,3734 | 0,0000 | 0,0002 |
| ENSG00000130158 | DOCK6    | dedicator of cytokinesis 6                                        | 0,8858  | 1,8479 | 0,0000 | 0,0000 |
| ENSG00000107099 | DOCK8    | dedicator of cytokinesis 8                                        | -0,8140 | 0,5688 | 0,0000 | 0,0000 |
| ENSG00000088387 | DOCK9    | dedicator of cytokinesis 9                                        | -0,6298 | 0,6463 | 0,0000 | 0,0000 |
| ENSG00000132768 | DPH2     | DPH2 homolog                                                      | -0,5357 | 0,6898 | 0,0000 | 0,0000 |
| ENSG00000154813 | DPH3     | diphthamide biosynthesis 3                                        | -0,4660 | 0,7240 | 0,0000 | 0,0000 |
| ENSG00000156162 | DPY19L4  | dpy-19-like 4 (C. elegans)                                        | -0,4270 | 0,7438 | 0,0000 | 0,0000 |
| ENSG00000113657 | DPYSL3   | dihydropyrimidinase-like 3                                        | 1,2044  | 2,3043 | 0,0000 | 0,0000 |
| ENSG00000151640 | DPYSL4   | dihydropyrimidinase-like 4                                        | 0,9219  | 1,8946 | 0,0008 | 0,0075 |
| ENSG00000134755 | DSC2     | desmocollin 2                                                     | 0,6320  | 1,5497 | 0,0001 | 0,0010 |
| ENSG00000138101 | DTNB     | dystrobrevin, beta                                                | 0,4567  | 1,3724 | 0,0000 | 0,0001 |
| ENSG00000178498 | DTX3     | deltex 3, E3 ubiquitin ligase                                     | 0,4003  | 1,3198 | 0,0000 | 0,0001 |
| ENSG00000110042 | DTX4     | deltex 4, E3 ubiquitin ligase                                     | -0,6408 | 0,6414 | 0,0000 | 0,0000 |
| ENSG00000105865 | DUS4L    | dihydrouridine synthase 4-like                                    | -0,5127 | 0,7009 | 0,0000 | 0,0000 |
| ENSG00000120129 | DUSP1    | dual specificity phosphatase 1                                    | 0,5001  | 1,4143 | 0,0001 | 0,0011 |
| ENSG00000079393 | DUSP13   | dual specificity phosphatase 13                                   | 1,7767  | 3,4263 | 0,0000 | 0,0000 |
| ENSG00000139318 | DUSP6    | dual specificity phosphatase 6                                    | -0,4084 | 0,7535 | 0,0000 | 0,0000 |
| ENSG00000184545 | DUSP8    | dual specificity phosphatase 8                                    | 0,6386  | 1,5569 | 0,0008 | 0,0080 |
| ENSG00000004975 | DVL2     | dishevelled segment polarity protein 2                            | 0,5375  | 1,4514 | 0,0000 | 0,0000 |
| ENSG00000138036 | DYNC2L11 | dynein, cytoplasmic 2, light intermediate chain 1                 | 0,7066  | 1,6320 | 0,0000 | 0,0000 |
| ENSG00000088986 | DYNLL1   | dynein, light chain, LC8-type 1                                   | -0,4995 | 0,7074 | 0,0000 | 0,0001 |
| ENSG00000264364 | DYNLL2   | dynein, light chain, LC8-type 2                                   | -0,4047 | 0,7554 | 0,0000 | 0,0000 |
| ENSG00000105204 | DYRK1B   | dual-specificity tyrosine-(Y)-phosphorylation regulated kinase 1B | 1,3801  | 2,6028 | 0,0000 | 0,0000 |

|                 |          |                                                                  |         |        |        |        |
|-----------------|----------|------------------------------------------------------------------|---------|--------|--------|--------|
| ENSG0000010219  | DYRK4    | dual-specificity tyrosine-(Y)-phosphorylation regulated kinase 4 | 0,4859  | 1,4004 | 0,0000 | 0,0000 |
| ENSG00000135636 | DYSF     | dysferlin                                                        | 1,5023  | 2,8329 | 0,0000 | 0,0000 |
| ENSG00000112242 | E2F3     | E2F transcription factor 3                                       | -0,4284 | 0,7431 | 0,0000 | 0,0000 |
| ENSG00000133740 | E2F5     | E2F transcription factor 5, p130-binding                         | -0,7063 | 0,6129 | 0,0000 | 0,0000 |
| ENSG00000088881 | EBF4     | early B-cell factor 4                                            | 0,6204  | 1,5373 | 0,0000 | 0,0005 |
| ENSG00000117395 | EBNA1BP2 | EBNA1 binding protein 2                                          | -0,4071 | 0,7542 | 0,0001 | 0,0018 |
| ENSG00000171551 | ECEL1    | endothelin converting enzyme-like 1                              | 0,7160  | 1,6426 | 0,0007 | 0,0068 |
| ENSG00000093144 | ECHDC1   | ethylmalonyl-CoA decarboxylase 1                                 | -0,5783 | 0,6698 | 0,0000 | 0,0000 |
| ENSG00000167969 | ECI1     | enoyl-CoA delta isomerase 1                                      | 0,4590  | 1,3746 | 0,0001 | 0,0012 |
| ENSG00000143369 | ECM1     | extracellular matrix protein 1                                   | 0,7873  | 1,7259 | 0,0000 | 0,0000 |
| ENSG00000114346 | ECT2     | epithelial cell transforming 2                                   | -0,5151 | 0,6998 | 0,0000 | 0,0000 |
| ENSG00000158813 | EDA      | ectodysplasin A                                                  | 0,4291  | 1,3464 | 0,0000 | 0,0003 |
| ENSG00000131080 | EDA2R    | ectodysplasin A2 receptor                                        | -0,7320 | 0,6021 | 0,0001 | 0,0011 |
| ENSG00000078401 | EDN1     | endothelin 1                                                     | -1,1616 | 0,4470 | 0,0000 | 0,0000 |
| ENSG00000127129 | EDN2     | endothelin 2                                                     | 1,0398  | 2,0560 | 0,0000 | 0,0000 |
| ENSG00000124205 | EDN3     | endothelin 3                                                     | 0,9389  | 1,9171 | 0,0000 | 0,0003 |
| ENSG00000124802 | EEF1E1   | eukaryotic translation elongation factor 1 epsilon 1             | -0,4538 | 0,7301 | 0,0001 | 0,0017 |
| ENSG00000118894 | EEF2KMT  | eukaryotic elongation factor 2 lysine methyltransferase          | -0,4172 | 0,7489 | 0,0004 | 0,0042 |
| ENSG00000203965 | EFCAB7   | EF-hand calcium binding domain 7                                 | 0,7210  | 1,6483 | 0,0000 | 0,0000 |
| ENSG00000115468 | EFHD1    | EF-hand domain family, member D1                                 | 0,9877  | 1,9831 | 0,0000 | 0,0007 |
| ENSG00000142634 | EFHD2    | EF-hand domain family, member D2                                 | -0,4998 | 0,7072 | 0,0000 | 0,0001 |
| ENSG00000143590 | EFNA3    | ephrin-A3                                                        | 0,7361  | 1,6657 | 0,0000 | 0,0000 |
| ENSG00000090776 | EFNB1    | ephrin-B1                                                        | -0,4040 | 0,7558 | 0,0000 | 0,0003 |
| ENSG00000084710 | EFR3B    | EFR3 homolog B                                                   | 0,8433  | 1,7941 | 0,0000 | 0,0000 |
| ENSG00000138798 | EGF      | epidermal growth factor                                          | 0,8466  | 1,7983 | 0,0007 | 0,0071 |
| ENSG00000164318 | EGFLAM   | EGF-like, fibronectin type III and laminin G domains             | 0,9757  | 1,9666 | 0,0000 | 0,0002 |
| ENSG00000146648 | EGFR     | epidermal growth factor receptor                                 | -0,7226 | 0,6060 | 0,0000 | 0,0000 |
| ENSG00000129521 | EGLN3    | egl-9 family hypoxia-inducible factor 3                          | 0,7709  | 1,7063 | 0,0000 | 0,0000 |
| ENSG00000110047 | EHD1     | EH-domain containing 1                                           | -0,4927 | 0,7107 | 0,0000 | 0,0000 |
| ENSG00000024422 | EHD2     | EH-domain containing 2                                           | 1,1640  | 2,2408 | 0,0000 | 0,0000 |
| ENSG00000176401 | EID2B    | EP300 interacting inhibitor of differentiation 2B                | 0,4720  | 1,3870 | 0,0002 | 0,0020 |

|                 |           |                                                                           |         |        |        |        |
|-----------------|-----------|---------------------------------------------------------------------------|---------|--------|--------|--------|
| ENSG00000173674 | EIF1AX    | eukaryotic translation initiation factor 1A, X-linked                     | -0,4907 | 0,7117 | 0,0000 | 0,0000 |
| ENSG00000134001 | EIF2S1    | eukaryotic translation initiation factor 2, subunit 1 alpha, 35kDa        | -0,3994 | 0,7582 | 0,0000 | 0,0007 |
| ENSG00000106263 | EIF3B     | eukaryotic translation initiation factor 3, subunit B                     | -0,4452 | 0,7345 | 0,0000 | 0,0000 |
| ENSG00000104131 | EIF3J     | eukaryotic translation initiation factor 3, subunit J                     | -0,6040 | 0,6579 | 0,0000 | 0,0000 |
| ENSG00000151247 | EIF4E     | eukaryotic translation initiation factor 4E                               | -0,4843 | 0,7148 | 0,0000 | 0,0000 |
| ENSG00000187840 | EIF4EBP1  | eukaryotic translation initiation factor 4E binding protein 1             | 0,7659  | 1,7004 | 0,0000 | 0,0000 |
| ENSG00000148730 | EIF4EBP2  | eukaryotic translation initiation factor 4E binding protein 2             | -0,3862 | 0,7652 | 0,0000 | 0,0000 |
| ENSG00000110321 | EIF4G2    | eukaryotic translation initiation factor 4 gamma, 2                       | -0,6080 | 0,6561 | 0,0000 | 0,0000 |
| ENSG00000100664 | EIF5      | eukaryotic translation initiation factor 5                                | -0,6311 | 0,6457 | 0,0000 | 0,0000 |
| ENSG00000163577 | EIF5A2    | eukaryotic translation initiation factor 5A2                              | -0,4177 | 0,7486 | 0,0000 | 0,0001 |
| ENSG00000158417 | EIF5B     | eukaryotic translation initiation factor 5B                               | -0,4307 | 0,7419 | 0,0000 | 0,0001 |
| ENSG00000107105 | ELAVL2    | ELAV like neuron-specific RNA binding protein 2                           | 1,2589  | 2,3932 | 0,0000 | 0,0000 |
| ENSG00000163435 | ELF3      | E74-like factor 3 (ets domain transcription factor, epithelial-specific ) | 0,9271  | 1,9014 | 0,0000 | 0,0000 |
| ENSG00000236081 | ELFN1-AS1 | ELFN1 antisense RNA 1                                                     | 0,7177  | 1,6446 | 0,0000 | 0,0000 |
| ENSG00000154920 | EME1      | essential meiotic structure-specific endonuclease 1                       | 0,4566  | 1,3723 | 0,0000 | 0,0001 |
| ENSG00000186998 | EMID1     | EMI domain containing 1                                                   | 0,6806  | 1,6028 | 0,0002 | 0,0024 |
| ENSG00000132205 | EMILIN2   | elastin microfibril interfacier 2                                         | -0,4301 | 0,7422 | 0,0004 | 0,0047 |
| ENSG00000134531 | EMP1      | epithelial membrane protein 1                                             | -0,4201 | 0,7474 | 0,0000 | 0,0000 |
| ENSG00000164778 | EN2       | engrailed homeobox 2                                                      | -0,4218 | 0,7465 | 0,0000 | 0,0000 |
| ENSG00000171617 | ENC1      | ectodermal-neural cortex 1 (with BTB domain)                              | -0,9416 | 0,5207 | 0,0000 | 0,0000 |
| ENSG00000167136 | ENDOG     | endonuclease G                                                            | 0,3980  | 1,3177 | 0,0008 | 0,0081 |
| ENSG00000167280 | ENGASE    | endo-beta-N-acetylglucosaminidase                                         | 0,5240  | 1,4380 | 0,0000 | 0,0004 |
| ENSG00000124074 | ENKD1     | enkurin domain containing 1                                               | 0,9385  | 1,9165 | 0,0000 | 0,0000 |
| ENSG00000111674 | ENO2      | enolase 2 (gamma, neuronal)                                               | 0,7263  | 1,6544 | 0,0000 | 0,0000 |
| ENSG00000154269 | ENPP3     | ectonucleotide pyrophosphatase/phosphodiesterase 3                        | 1,7730  | 3,4175 | 0,0000 | 0,0000 |
| ENSG00000112796 | ENPP5     | ectonucleotide pyrophosphatase/phosphodiesterase 5 (putative)             | 0,8988  | 1,8645 | 0,0000 | 0,0000 |
| ENSG00000188833 | ENTPD8    | ectonucleoside triphosphate diphosphohydrolase 8                          | 1,3956  | 2,6310 | 0,0000 | 0,0000 |
| ENSG00000163508 | EOMES     | eomesodermin                                                              | -0,8984 | 0,5365 | 0,0010 | 0,0091 |
| ENSG00000142627 | EPHA2     | EPH receptor A2                                                           | -0,4753 | 0,7193 | 0,0000 | 0,0001 |
| ENSG00000187266 | EPOR      | erythropoietin receptor                                                   | 0,5741  | 1,4888 | 0,0000 | 0,0004 |
| ENSG00000177106 | EPS8L2    | EPS8-like 2                                                               | 0,4297  | 1,3470 | 0,0003 | 0,0035 |



|                 |         |                                                           |         |        |        |        |
|-----------------|---------|-----------------------------------------------------------|---------|--------|--------|--------|
| ENSG00000133106 | EPST1   | epithelial stromal interaction 1 (breast)                 | -1,2994 | 0,4063 | 0,0000 | 0,0000 |
| ENSG00000065361 | ERBB3   | erb-b2 receptor tyrosine kinase 3                         | 0,5027  | 1,4169 | 0,0000 | 0,0000 |
| ENSG00000187672 | ERC2    | ELKS/RAB6-interacting/CAST family member 2                | -0,9791 | 0,5073 | 0,0000 | 0,0000 |
| ENSG00000134899 | ERCC5   | excision repair cross-complementation group 5             | -0,8057 | 0,5721 | 0,0000 | 0,0000 |
| ENSG00000182150 | ERCC6L2 | excision repair cross-complementation group 6-like 2      | -0,4220 | 0,7464 | 0,0000 | 0,0001 |
| ENSG00000100632 | ERH     | enhancer of rudimentary homolog (Drosophila)              | -0,5000 | 0,7071 | 0,0000 | 0,0001 |
| ENSG00000099219 | ERMP1   | endoplasmic reticulum metalloproteinase 1                 | 0,4830  | 1,3977 | 0,0000 | 0,0000 |
| ENSG00000116285 | ERRF1   | ERBB receptor feedback inhibitor 1                        | 0,4971  | 1,4114 | 0,0000 | 0,0000 |
| ENSG00000139684 | ESD     | esterase D                                                | -0,4664 | 0,7238 | 0,0000 | 0,0001 |
| ENSG00000089048 | ESF1    | ESF1 nucleolar pre-rRNA processing protein homolog        | -0,3808 | 0,7680 | 0,0003 | 0,0038 |
| ENSG00000135476 | ESPL1   | extra spindle pole bodies like 1, separase                | 0,5444  | 1,4584 | 0,0000 | 0,0000 |
| ENSG00000187017 | ESPN    | espin                                                     | 0,9773  | 1,9688 | 0,0000 | 0,0000 |
| ENSG00000268869 | ESPNP   | espin pseudogene                                          | 0,9298  | 1,9050 | 0,0000 | 0,0001 |
| ENSG00000104413 | ESRP1   | epithelial splicing regulatory protein 1                  | 0,4368  | 1,3536 | 0,0000 | 0,0000 |
| ENSG00000120705 | ETF1    | eukaryotic translation termination factor 1               | -0,5639 | 0,6765 | 0,0000 | 0,0000 |
| ENSG00000232757 | ETF1P1  | eukaryotic translation termination factor 1 pseudogene 1  | -0,6902 | 0,6197 | 0,0000 | 0,0005 |
| ENSG00000105379 | ETFB    | electron-transfer-flavoprotein, beta polypeptide          | 0,7562  | 1,6891 | 0,0000 | 0,0000 |
| ENSG00000134954 | ETS1    | v-ets avian erythroblastosis virus E26 oncogene homolog 1 | -1,0868 | 0,4708 | 0,0000 | 0,0000 |
| ENSG00000006468 | ETV1    | ets variant 1                                             | 0,5889  | 1,5041 | 0,0000 | 0,0000 |
| ENSG00000117036 | ETV3    | ets variant 3                                             | -0,6699 | 0,6286 | 0,0000 | 0,0000 |
| ENSG00000142459 | EVI5L   | ecotropic viral integration site 5-like                   | 0,7096  | 1,6354 | 0,0000 | 0,0001 |
| ENSG00000106038 | EVX1    | even-skipped homeobox 1                                   | 0,9537  | 1,9369 | 0,0005 | 0,0052 |
| ENSG00000130713 | EXOSC2  | exosome component 2                                       | -0,4049 | 0,7553 | 0,0000 | 0,0002 |
| ENSG00000077348 | EXOSC5  | exosome component 5                                       | 0,4358  | 1,3527 | 0,0001 | 0,0014 |
| ENSG00000120699 | EXOSC8  | exosome component 8                                       | -0,5409 | 0,6874 | 0,0000 | 0,0000 |
| ENSG00000182197 | EXT1    | exostosin glycosyltransferase 1                           | -0,3937 | 0,7612 | 0,0000 | 0,0006 |
| ENSG00000108799 | EZH1    | enhancer of zeste 1 polycomb repressive complex 2 subunit | 0,4192  | 1,3372 | 0,0000 | 0,0005 |
| ENSG00000126218 | F10     | coagulation factor X                                      | 0,8454  | 1,7967 | 0,0000 | 0,0001 |
| ENSG00000124491 | F13A1   | coagulation factor XIII, A1 polypeptide                   | -0,7523 | 0,5937 | 0,0000 | 0,0000 |
| ENSG00000164251 | F2RL1   | coagulation factor II (thrombin) receptor-like 1          | -0,4336 | 0,7404 | 0,0000 | 0,0002 |
| ENSG00000103089 | FA2H    | fatty acid 2-hydroxylase                                  | 0,7984  | 1,7391 | 0,0000 | 0,0000 |

|                 |          |                                                                |         |        |        |        |
|-----------------|----------|----------------------------------------------------------------|---------|--------|--------|--------|
| ENSG00000221968 | FADS3    | fatty acid desaturase 3                                        | 0,4604  | 1,3759 | 0,0000 | 0,0002 |
| ENSG00000103876 | FAH      | fumarylacetoacetate hydrolase (fumarylacetoacetase)            | -0,4250 | 0,7448 | 0,0000 | 0,0000 |
| ENSG00000231584 | FAHD2CP  | fumarylacetoacetate hydrolase domain containing 2C, pseudogene | 0,5623  | 1,4766 | 0,0000 | 0,0003 |
| ENSG00000158234 | FAIM     | Fas apoptotic inhibitory molecule                              | -0,4760 | 0,7190 | 0,0000 | 0,0001 |
| ENSG00000184731 | FAM110C  | family with sequence similarity 110, member C                  | -0,5607 | 0,6780 | 0,0000 | 0,0000 |
| ENSG00000189057 | FAM111B  | family with sequence similarity 111, member B                  | -0,6348 | 0,6440 | 0,0000 | 0,0000 |
| ENSG00000197712 | FAM114A1 | family with sequence similarity 114, member A1                 | 0,7975  | 1,7381 | 0,0000 | 0,0000 |
| ENSG00000184083 | FAM120C  | family with sequence similarity 120C                           | -0,9701 | 0,5105 | 0,0000 | 0,0000 |
| ENSG00000122591 | FAM126A  | family with sequence similarity 126, member A                  | -0,4372 | 0,7386 | 0,0000 | 0,0000 |
| ENSG00000175182 | FAM131A  | family with sequence similarity 131, member A                  | 0,6454  | 1,5642 | 0,0000 | 0,0000 |
| ENSG00000179083 | FAM133A  | family with sequence similarity 133, member A                  | -2,4324 | 0,1853 | 0,0000 | 0,0000 |
| ENSG00000234545 | FAM133B  | family with sequence similarity 133, member B                  | -0,3812 | 0,7678 | 0,0001 | 0,0011 |
| ENSG00000144567 | FAM134A  | family with sequence similarity 134, member A                  | 0,3908  | 1,3111 | 0,0000 | 0,0000 |
| ENSG00000154153 | FAM134B  | family with sequence similarity 134, member B                  | 0,6609  | 1,5811 | 0,0000 | 0,0000 |
| ENSG00000035141 | FAM136A  | family with sequence similarity 136, member A                  | -0,3794 | 0,7688 | 0,0001 | 0,0013 |
| ENSG00000138640 | FAM13A   | family with sequence similarity 13, member A                   | 1,4074  | 2,6526 | 0,0000 | 0,0000 |
| ENSG00000031003 | FAM13B   | family with sequence similarity 13, member B                   | -0,4564 | 0,7288 | 0,0000 | 0,0003 |
| ENSG00000164142 | FAM160A1 | family with sequence similarity 160, member A1                 | 0,6253  | 1,5425 | 0,0000 | 0,0000 |
| ENSG00000170264 | FAM161A  | family with sequence similarity 161, member A                  | 0,4711  | 1,3861 | 0,0000 | 0,0003 |
| ENSG00000114023 | FAM162A  | family with sequence similarity 162, member A                  | 0,4830  | 1,3976 | 0,0000 | 0,0000 |
| ENSG00000196990 | FAM163B  | family with sequence similarity 163, member B                  | 0,9396  | 1,9180 | 0,0003 | 0,0029 |
| ENSG00000150756 | FAM173B  | family with sequence similarity 173, member B                  | -0,4754 | 0,7193 | 0,0000 | 0,0001 |
| ENSG00000174132 | FAM174A  | family with sequence similarity 174, member A                  | 0,4370  | 1,3538 | 0,0008 | 0,0074 |
| ENSG00000168754 | FAM178B  | family with sequence similarity 178, member B                  | 0,6789  | 1,6009 | 0,0001 | 0,0015 |
| ENSG00000198718 | FAM179B  | family with sequence similarity 179, member B                  | -0,4255 | 0,7446 | 0,0001 | 0,0014 |
| ENSG00000108021 | FAM208B  | family with sequence similarity 208, member B                  | -0,6826 | 0,6230 | 0,0000 | 0,0000 |
| ENSG00000177706 | FAM20C   | family with sequence similarity 20, member C                   | -0,6214 | 0,6500 | 0,0000 | 0,0000 |
| ENSG00000047346 | FAM214A  | family with sequence similarity 214, member A                  | 0,5180  | 1,4320 | 0,0000 | 0,0002 |
| ENSG00000167930 | FAM234A  | family with sequence similarity 234, member A                  | 0,4580  | 1,3737 | 0,0001 | 0,0011 |
| ENSG00000071889 | FAM3A    | family with sequence similarity 3, member A                    | 0,4368  | 1,3536 | 0,0003 | 0,0030 |
| ENSG00000185112 | FAM43A   | family with sequence similarity 43, member A                   | -0,5805 | 0,6687 | 0,0000 | 0,0002 |

|                  |         |                                                     |         |        |        |        |
|------------------|---------|-----------------------------------------------------|---------|--------|--------|--------|
| ENSG00000153310  | FAM49B  | family with sequence similarity 49, member B        | -0,3919 | 0,7621 | 0,0001 | 0,0010 |
| ENSG00000149926  | FAM57B  | family with sequence similarity 57, member B        | 0,9978  | 1,9970 | 0,0000 | 0,0000 |
| ENSG00000165716  | FAM69B  | family with sequence similarity 69, member B        | 0,7975  | 1,7380 | 0,0000 | 0,0000 |
| ENSG00000119812  | FAM98A  | family with sequence similarity 98, member A        | -0,5497 | 0,6831 | 0,0000 | 0,0000 |
| ENSG00000197601  | FAR1    | fatty acyl CoA reductase 1                          | -0,4097 | 0,7528 | 0,0000 | 0,0001 |
| ENSG00000180178  | FAR2P1  | fatty acyl CoA reductase 2 pseudogene 1             | 1,0910  | 2,1302 | 0,0000 | 0,0004 |
| ENSG00000026103  | FAS     | Fas cell surface death receptor                     | -0,5282 | 0,6934 | 0,0000 | 0,0000 |
| ENSG00000164896  | FASTK   | Fas-activated serine/threonine kinase               | 0,4307  | 1,3479 | 0,0001 | 0,0011 |
| ENSG00000124279  | FASTKD3 | FAST kinase domains 3                               | -0,6515 | 0,6366 | 0,0000 | 0,0000 |
| ENSG00000165323  | FAT3    | FAT atypical cadherin 3                             | 0,9068  | 1,8748 | 0,0009 | 0,0087 |
| ENSG00000188878  | FBF1    | Fas (TNFRSF6) binding factor 1                      | 0,8105  | 1,7539 | 0,0000 | 0,0001 |
| ENSG00000142449  | FBN3    | fibrillin 3                                         | 0,7476  | 1,6790 | 0,0001 | 0,0017 |
| ENSG00000165140  | FBP1    | fructose-1,6-bisphosphatase 1                       | -1,4098 | 0,3764 | 0,0000 | 0,0000 |
| ENSG00000153558  | FBXL2   | F-box and leucine-rich repeat protein 2             | 0,7975  | 1,7381 | 0,0000 | 0,0000 |
| ENSG00000108306  | FBXL20  | F-box and leucine-rich repeat protein 20            | 0,6052  | 1,5212 | 0,0000 | 0,0000 |
| ENSG00000005812  | FBXL3   | F-box and leucine-rich repeat protein 3             | -0,7708 | 0,5861 | 0,0000 | 0,0000 |
| ENSG00000214050  | FBXO16  | F-box protein 16                                    | 0,6880  | 1,6110 | 0,0003 | 0,0030 |
| ENSG00000116661  | FBXO2   | F-box protein 2                                     | 0,3951  | 1,3150 | 0,0001 | 0,0018 |
| ENSG00000156804  | FBXO32  | F-box protein 32                                    | 1,7855  | 3,4474 | 0,0000 | 0,0000 |
| ENSG00000153832  | FBXO36  | F-box protein 36                                    | 0,6438  | 1,5624 | 0,0000 | 0,0002 |
| ENSG00000132879  | FBXO44  | F-box protein 44                                    | 0,4627  | 1,3782 | 0,0000 | 0,0005 |
| ENSG00000177051  | FBXO46  | F-box protein 46                                    | 0,3891  | 1,3095 | 0,0008 | 0,0078 |
| ENSG00000119616  | FCF1    | FCF1 rRNA-processing protein                        | -0,4848 | 0,7146 | 0,0000 | 0,0000 |
| ENSG00000197948  | FCHSD1  | FCH and double SH3 domains 1                        | 0,5972  | 1,5127 | 0,0000 | 0,0000 |
| ENSG00000160752  | FDPS    | farnesyl diphosphate synthase                       | -0,4025 | 0,7565 | 0,0000 | 0,0000 |
| ENSG000000088340 | FER1L4  | fer-1-like family member 4, pseudogene (functional) | 1,0404  | 2,0568 | 0,0000 | 0,0000 |
| ENSG00000101311  | FERMT1  | fermitin family member 1                            | -1,0348 | 0,4881 | 0,0000 | 0,0000 |
| ENSG00000154783  | FGD5    | FYVE, RhoGEF and PH domain containing 5             | 0,6948  | 1,6187 | 0,0000 | 0,0000 |
| ENSG00000129682  | FGF13   | fibroblast growth factor 13                         | -0,6679 | 0,6294 | 0,0000 | 0,0000 |
| ENSG00000162344  | FGF19   | fibroblast growth factor 19                         | -0,4708 | 0,7216 | 0,0000 | 0,0000 |
| ENSG00000105550  | FGF21   | fibroblast growth factor 21                         | 0,9443  | 1,9243 | 0,0004 | 0,0046 |

|                 |          |                                                      |         |        |        |        |
|-----------------|----------|------------------------------------------------------|---------|--------|--------|--------|
| ENSG00000102678 | FGF9     | fibroblast growth factor 9                           | -1,3241 | 0,3994 | 0,0000 | 0,0000 |
| ENSG00000127418 | FGFRL1   | fibroblast growth factor receptor-like 1             | 0,9539  | 1,9371 | 0,0000 | 0,0000 |
| ENSG00000091483 | FH       | fumarate hydratase                                   | -0,4145 | 0,7503 | 0,0001 | 0,0017 |
| ENSG00000022267 | FHL1     | four and a half LIM domains 1                        | -0,4521 | 0,7310 | 0,0000 | 0,0002 |
| ENSG00000134775 | FHOD3    | formin homology 2 domain containing 3                | 0,7470  | 1,6783 | 0,0000 | 0,0000 |
| ENSG00000213468 | FIRRE    | firre intergenic repeating RNA element               | 0,3996  | 1,3192 | 0,0008 | 0,0078 |
| ENSG00000179431 | FJX1     | four jointed box 1                                   | -0,5376 | 0,6889 | 0,0000 | 0,0000 |
| ENSG00000106080 | FKBP14   | FK506 binding protein 14, 22 kDa                     | -0,3950 | 0,7605 | 0,0000 | 0,0002 |
| ENSG00000088832 | FKBP1A   | FK506 binding protein 1A, 12kDa                      | -0,4015 | 0,7571 | 0,0001 | 0,0012 |
| ENSG00000100442 | FKBP3    | FK506 binding protein 3, 25kDa                       | -0,4317 | 0,7414 | 0,0000 | 0,0001 |
| ENSG00000105701 | FKBP8    | FK506 binding protein 8, 38kDa                       | 0,4446  | 1,3610 | 0,0004 | 0,0047 |
| ENSG00000176826 | FKBP9P1  | FK506 binding protein 9 pseudogene 1                 | 1,2356  | 2,3547 | 0,0000 | 0,0000 |
| ENSG00000154803 | FLCN     | folliculin                                           | 0,5435  | 1,4575 | 0,0000 | 0,0000 |
| ENSG00000232774 | FLJ22447 | uncharacterized LOC400221                            | -1,1352 | 0,4553 | 0,0000 | 0,0000 |
| ENSG00000137312 | FLOT1    | flotillin 1                                          | 0,6650  | 1,5855 | 0,0000 | 0,0000 |
| ENSG00000162769 | FLVCR1   | feline leukemia virus subgroup C cellular receptor 1 | -0,3849 | 0,7658 | 0,0003 | 0,0035 |
| ENSG00000161791 | FMNL3    | formin-like 3                                        | -0,4129 | 0,7511 | 0,0000 | 0,0000 |
| ENSG00000167363 | FN3K     | fructosamine 3 kinase                                | 0,5400  | 1,4539 | 0,0001 | 0,0012 |
| ENSG00000115226 | FNDC4    | fibronectin type III domain containing 4             | 0,5447  | 1,4588 | 0,0000 | 0,0004 |
| ENSG00000110195 | FOLR1    | folate receptor 1 (adult)                            | 1,1444  | 2,2105 | 0,0000 | 0,0000 |
| ENSG00000125740 | FOSB     | FBJ murine osteosarcoma viral oncogene homolog B     | 0,4331  | 1,3502 | 0,0005 | 0,0052 |
| ENSG00000075426 | FOSL2    | FOS-like antigen 2                                   | 0,4533  | 1,3692 | 0,0000 | 0,0000 |
| ENSG00000125798 | FOXA2    | forkhead box A2                                      | 0,8079  | 1,7507 | 0,0000 | 0,0000 |
| ENSG00000137273 | FOXF2    | forkhead box F2                                      | -0,4274 | 0,7436 | 0,0000 | 0,0007 |
| ENSG00000176678 | FOXL1    | forkhead box L1                                      | 0,4866  | 1,4012 | 0,0000 | 0,0001 |
| ENSG00000150907 | FOXO1    | forkhead box O1                                      | -0,4234 | 0,7457 | 0,0004 | 0,0043 |
| ENSG00000187474 | FPR3     | formyl peptide receptor 3                            | 1,7430  | 3,3474 | 0,0000 | 0,0000 |
| ENSG00000151474 | FRMD4A   | FERM domain containing 4A                            | 0,6439  | 1,5625 | 0,0000 | 0,0000 |
| ENSG00000114541 | FRMD4B   | FERM domain containing 4B                            | 0,5751  | 1,4898 | 0,0001 | 0,0018 |
| ENSG00000070601 | FRMPD1   | FERM and PDZ domain containing 1                     | 1,4760  | 2,7818 | 0,0000 | 0,0000 |
| ENSG00000137218 | FRS3     | fibroblast growth factor receptor substrate 3        | 0,8000  | 1,7411 | 0,0000 | 0,0001 |

|                 |          |                                                                         |         |        |        |        |
|-----------------|----------|-------------------------------------------------------------------------|---------|--------|--------|--------|
| ENSG00000075618 | FSCN1    | fascin actin-bundling protein 1                                         | -0,6567 | 0,6343 | 0,0000 | 0,0000 |
| ENSG00000186765 | FSCN2    | fascin actin-bundling protein 2, retinal                                | 1,1572  | 2,2302 | 0,0000 | 0,0000 |
| ENSG00000070404 | FSTL3    | follistatin-like 3 (secreted glycoprotein)                              | 0,5587  | 1,4729 | 0,0000 | 0,0000 |
| ENSG00000053108 | FSTL4    | follistatin-like 4                                                      | 1,3565  | 2,5607 | 0,0000 | 0,0000 |
| ENSG00000162613 | FUBP1    | far upstream element (FUSE) binding protein 1                           | -0,5214 | 0,6967 | 0,0000 | 0,0000 |
| ENSG00000179163 | FUCA1    | fucosidase, alpha-L- 1, tissue                                          | -0,6777 | 0,6252 | 0,0000 | 0,0000 |
| ENSG00000069509 | FUNDC1   | FUN14 domain containing 1                                               | -0,4122 | 0,7515 | 0,0001 | 0,0016 |
| ENSG00000196968 | FUT11    | fucosyltransferase 11 (alpha (1,3) fucosyltransferase)                  | 0,4747  | 1,3896 | 0,0000 | 0,0000 |
| ENSG00000196371 | FUT4     | fucosyltransferase 4 (alpha (1,3) fucosyltransferase, myeloid-specific) | -0,4925 | 0,7108 | 0,0000 | 0,0000 |
| ENSG00000165060 | FXN      | frataxin                                                                | -0,4557 | 0,7291 | 0,0002 | 0,0028 |
| ENSG00000137726 | FXYP6    | FXYP domain containing ion transport regulator 6                        | 1,1970  | 2,2925 | 0,0000 | 0,0000 |
| ENSG00000157240 | FZD1     | frizzled class receptor 1                                               | -0,5499 | 0,6831 | 0,0000 | 0,0000 |
| ENSG00000145907 | G3BP1    | GTPase activating protein (SH3 domain) binding protein 1                | -0,4952 | 0,7095 | 0,0000 | 0,0000 |
| ENSG00000171298 | GAA      | glucosidase, alpha; acid                                                | 0,9361  | 1,9133 | 0,0000 | 0,0000 |
| ENSG00000033327 | GAB2     | GRB2-associated binding protein 2                                       | 0,9095  | 1,8784 | 0,0000 | 0,0000 |
| ENSG00000170296 | GABARAP  | GABA(A) receptor-associated protein                                     | 0,3918  | 1,3120 | 0,0001 | 0,0014 |
| ENSG00000011677 | GABRA3   | gamma-aminobutyric acid (GABA) A receptor, alpha 3                      | -0,6393 | 0,6420 | 0,0000 | 0,0000 |
| ENSG00000099860 | GADD45B  | growth arrest and DNA-damage-inducible, beta                            | 0,5068  | 1,4209 | 0,0000 | 0,0000 |
| ENSG00000128242 | GAL3ST1  | galactose-3-O-sulfotransferase 1                                        | 1,5793  | 2,9883 | 0,0000 | 0,0000 |
| ENSG00000054983 | GALC     | galactosylceramidase                                                    | -0,6172 | 0,6519 | 0,0000 | 0,0006 |
| ENSG00000108479 | GALK1    | galactokinase 1                                                         | 0,7215  | 1,6489 | 0,0000 | 0,0000 |
| ENSG00000164574 | GALNT10  | polypeptide N-acetylgalactosaminyltransferase 10                        | -1,1689 | 0,4448 | 0,0000 | 0,0000 |
| ENSG00000109586 | GALNT7   | polypeptide N-acetylgalactosaminyltransferase 7                         | -0,5238 | 0,6955 | 0,0000 | 0,0000 |
| ENSG00000130035 | GALNT8   | polypeptide N-acetylgalactosaminyltransferase 8                         | 0,7949  | 1,7350 | 0,0000 | 0,0000 |
| ENSG00000130005 | GAMT     | guanidinoacetate N-methyltransferase                                    | 0,6968  | 1,6209 | 0,0000 | 0,0000 |
| ENSG00000109534 | GAR1     | GAR1 homolog, ribonucleoprotein                                         | -0,5497 | 0,6832 | 0,0000 | 0,0000 |
| ENSG00000141441 | GAREM    | GRB2 associated, regulator of MAPK1                                     | 0,9584  | 1,9432 | 0,0004 | 0,0042 |
| ENSG00000272695 | GAS6-AS2 | GAS6 antisense RNA 2 (head to head)                                     | -0,6791 | 0,6246 | 0,0001 | 0,0011 |
| ENSG00000141013 | GAS8     | growth arrest-specific 8                                                | 0,6015  | 1,5173 | 0,0000 | 0,0000 |
| ENSG00000179348 | GATA2    | GATA binding protein 2                                                  | 0,4215  | 1,3393 | 0,0001 | 0,0010 |
| ENSG00000239521 | GATS     | GATS, stromal antigen 3 opposite strand                                 | 0,4424  | 1,3589 | 0,0003 | 0,0034 |

|                 |          |                                                                                       |         |        |        |        |
|-----------------|----------|---------------------------------------------------------------------------------------|---------|--------|--------|--------|
| ENSG00000117226 | GBP3     | guanylate binding protein 3                                                           | -0,4974 | 0,7084 | 0,0000 | 0,0002 |
| ENSG00000100116 | GCAT     | glycine C-acetyltransferase                                                           | 1,2749  | 2,4198 | 0,0000 | 0,0000 |
| ENSG00000023909 | GCLM     | glutamate-cysteine ligase, modifier subunit                                           | -0,5614 | 0,6776 | 0,0000 | 0,0000 |
| ENSG00000104381 | GDAP1    | ganglioside induced differentiation associated protein 1                              | -0,6567 | 0,6343 | 0,0000 | 0,0000 |
| ENSG00000135414 | GDF11    | growth differentiation factor 11                                                      | -0,5945 | 0,6623 | 0,0000 | 0,0000 |
| ENSG00000130513 | GDF15    | growth differentiation factor 15                                                      | 1,8589  | 3,6274 | 0,0000 | 0,0000 |
| ENSG00000203879 | GDI1     | GDP dissociation inhibitor 1                                                          | 0,4324  | 1,3495 | 0,0000 | 0,0000 |
| ENSG00000057608 | GDI2     | GDP dissociation inhibitor 2                                                          | -0,4366 | 0,7389 | 0,0000 | 0,0001 |
| ENSG00000164949 | GEM      | GTP binding protein overexpressed in skeletal muscle                                  | 0,5845  | 1,4995 | 0,0009 | 0,0089 |
| ENSG00000082516 | GEMIN5   | gem (nuclear organelle) associated protein 5                                          | -0,7106 | 0,6111 | 0,0000 | 0,0000 |
| ENSG00000046647 | GEMIN8   | gem (nuclear organelle) associated protein 8                                          | 0,4766  | 1,3914 | 0,0000 | 0,0002 |
| ENSG00000178295 | GEN1     | GEN1 Holliday junction 5' flap endonuclease                                           | -0,3943 | 0,7608 | 0,0000 | 0,0003 |
| ENSG00000168827 | GFM1     | G elongation factor, mitochondrial 1                                                  | -0,4722 | 0,7209 | 0,0000 | 0,0000 |
| ENSG00000131459 | GFPT2    | glutamine-fructose-6-phosphate transaminase 2                                         | 1,3354  | 2,5235 | 0,0000 | 0,0000 |
| ENSG00000265107 | GJA5     | gap junction protein, alpha 5, 40kDa                                                  | 2,6456  | 6,2574 | 0,0000 | 0,0000 |
| ENSG00000189433 | GJB4     | gap junction protein, beta 4, 30.3kDa                                                 | 1,1273  | 2,1845 | 0,0000 | 0,0000 |
| ENSG00000149328 | GLB1L2   | galactosidase, beta 1-like 2                                                          | -0,3998 | 0,7579 | 0,0000 | 0,0000 |
| ENSG00000107249 | GLIS3    | GLIS family zinc finger 3                                                             | -0,7676 | 0,5874 | 0,0007 | 0,0067 |
| ENSG00000108010 | GLRX3    | glutaredoxin 3                                                                        | -0,4139 | 0,7506 | 0,0001 | 0,0012 |
| ENSG00000115419 | GLS      | glutaminase                                                                           | -0,7107 | 0,6110 | 0,0000 | 0,0000 |
| ENSG00000250903 | GMDS-AS1 | GMDS antisense RNA 1 (head to head)                                                   | 0,5766  | 1,4914 | 0,0007 | 0,0067 |
| ENSG00000101216 | GMEB2    | glucocorticoid modulatory element binding protein 2                                   | 0,4260  | 1,3435 | 0,0001 | 0,0008 |
| ENSG00000197045 | GMFB     | glia maturation factor, beta                                                          | -0,4107 | 0,7523 | 0,0000 | 0,0001 |
| ENSG00000137198 | GMPR     | guanosine monophosphate reductase                                                     | 0,3988  | 1,3184 | 0,0010 | 0,0094 |
| ENSG00000127955 | GNAI1    | guanine nucleotide binding protein (G protein), alpha inhibiting activity polypeptide | 1,4466  | 2,7256 | 0,0000 | 0,0000 |
| ENSG00000087258 | GNAO1    | guanine nucleotide binding protein (G protein), alpha activating activity polypeptide | 0,7707  | 1,7061 | 0,0000 | 0,0000 |
| ENSG00000128266 | GNAZ     | guanine nucleotide binding protein (G protein), alpha z polypeptide                   | 1,1058  | 2,1522 | 0,0000 | 0,0000 |
| ENSG00000168243 | GNG4     | guanine nucleotide binding protein (G protein), gamma 4                               | -0,6763 | 0,6258 | 0,0000 | 0,0000 |
| ENSG00000134697 | GNL2     | guanine nucleotide binding protein-like 2 (nucleolar)                                 | -0,4256 | 0,7445 | 0,0000 | 0,0001 |
| ENSG00000130119 | GNL3L    | guanine nucleotide binding protein-like 3 (nucleolar)-like                            | -0,4357 | 0,7393 | 0,0000 | 0,0001 |
| ENSG00000115523 | GPLY     | granulysin                                                                            | 1,3417  | 2,5344 | 0,0000 | 0,0000 |

|                 |           |                                                             |         |        |        |        |
|-----------------|-----------|-------------------------------------------------------------|---------|--------|--------|--------|
| ENSG00000100522 | GNPNAT1   | glucosamine-phosphate N-acetyltransferase 1                 | -0,4448 | 0,7347 | 0,0000 | 0,0001 |
| ENSG00000167110 | GOLGA2    | golgin A2                                                   | 0,5157  | 1,4297 | 0,0000 | 0,0000 |
| ENSG00000238105 | GOLGA2P5  | golgin A2 pseudogene 5                                      | 0,6593  | 1,5793 | 0,0000 | 0,0000 |
| ENSG00000261649 | GOLGA6L7P | golgin A6 family-like 7, pseudogene                         | 1,0916  | 2,1311 | 0,0000 | 0,0000 |
| ENSG00000232653 | GOLGA8N   | golgin A8 family, member N                                  | 0,7292  | 1,6577 | 0,0000 | 0,0003 |
| ENSG00000173905 | GOLIM4    | golgi integral membrane protein 4                           | -0,4572 | 0,7284 | 0,0000 | 0,0000 |
| ENSG00000135052 | GOLM1     | golgi membrane protein 1                                    | -0,3939 | 0,7611 | 0,0000 | 0,0000 |
| ENSG00000160818 | GPATCH4   | G patch domain containing 4                                 | -0,7598 | 0,5906 | 0,0000 | 0,0000 |
| ENSG00000152642 | GPD1L     | glycerol-3-phosphate dehydrogenase 1-like                   | -0,4980 | 0,7081 | 0,0000 | 0,0001 |
| ENSG00000183671 | GPR1      | G protein-coupled receptor 1                                | 0,6224  | 1,5394 | 0,0005 | 0,0055 |
| ENSG00000101850 | GPR143    | G protein-coupled receptor 143                              | -0,8690 | 0,5475 | 0,0000 | 0,0000 |
| ENSG00000164849 | GPR146    | G protein-coupled receptor 146                              | 0,6090  | 1,5252 | 0,0008 | 0,0076 |
| ENSG00000158292 | GPR153    | G protein-coupled receptor 153                              | 0,3977  | 1,3174 | 0,0008 | 0,0075 |
| ENSG00000173890 | GPR160    | G protein-coupled receptor 160                              | -0,6482 | 0,6381 | 0,0000 | 0,0001 |
| ENSG00000184194 | GPR173    | G protein-coupled receptor 173                              | -0,9857 | 0,5050 | 0,0000 | 0,0000 |
| ENSG00000152749 | GPR180    | G protein-coupled receptor 180                              | -0,8465 | 0,5561 | 0,0000 | 0,0000 |
| ENSG00000135898 | GPR55     | G protein-coupled receptor 55                               | -0,4017 | 0,7570 | 0,0002 | 0,0023 |
| ENSG00000135888 | GPRC5A    | G protein-coupled receptor, class C, group 5, member A      | -0,4263 | 0,7442 | 0,0000 | 0,0000 |
| ENSG00000167191 | GPRC5B    | G protein-coupled receptor, class C, group 5, member B      | 0,8741  | 1,8329 | 0,0000 | 0,0000 |
| ENSG00000160360 | GPSM1     | G-protein signaling modulator 1                             | 0,7845  | 1,7225 | 0,0000 | 0,0000 |
| ENSG00000166123 | GPT2      | glutamic pyruvate transaminase (alanine aminotransferase) 2 | 0,6273  | 1,5447 | 0,0000 | 0,0000 |
| ENSG00000176153 | GPX2      | glutathione peroxidase 2                                    | 1,2888  | 2,4432 | 0,0000 | 0,0000 |
| ENSG00000155324 | GRAMD3    | GRAM domain containing 3                                    | 0,8626  | 1,8183 | 0,0000 | 0,0000 |
| ENSG00000154016 | GRAP      | GRB2-related adaptor protein                                | -0,8349 | 0,5606 | 0,0000 | 0,0000 |
| ENSG00000100351 | GRAP2     | GRB2-related adaptor protein 2                              | 0,6927  | 1,6163 | 0,0001 | 0,0008 |
| ENSG00000189152 | GRAPL     | GRB2-related adaptor protein-like                           | -1,0132 | 0,4954 | 0,0001 | 0,0017 |
| ENSG00000141738 | GRB7      | growth factor receptor-bound protein 7                      | 1,1313  | 2,1905 | 0,0000 | 0,0000 |
| ENSG00000196208 | GREB1     | growth regulation by estrogen in breast cancer 1            | 0,8058  | 1,7482 | 0,0000 | 0,0000 |
| ENSG00000180875 | GREM2     | gremlin 2, DAN family BMP antagonist                        | 1,6495  | 3,1373 | 0,0000 | 0,0000 |
| ENSG00000149403 | GRIK4     | glutamate receptor, ionotropic, kainate 4                   | -0,9989 | 0,5004 | 0,0000 | 0,0001 |
| ENSG00000273079 | GRIN2B    | glutamate receptor, ionotropic, N-methyl D-aspartate 2B     | -0,8184 | 0,5671 | 0,0010 | 0,0090 |

|                 |          |                                                        |         |        |        |        |
|-----------------|----------|--------------------------------------------------------|---------|--------|--------|--------|
| ENSG00000179603 | GRM8     | glutamate receptor, metabotropic 8                     | 1,4784  | 2,7863 | 0,0000 | 0,0000 |
| ENSG00000109519 | GRPEL1   | GrpE-like 1, mitochondrial (E. coli)                   | -0,4423 | 0,7360 | 0,0000 | 0,0002 |
| ENSG00000132463 | GRSF1    | G-rich RNA sequence binding factor 1                   | -0,3805 | 0,7682 | 0,0002 | 0,0021 |
| ENSG00000105447 | GRWD1    | glutamate-rich WD repeat containing 1                  | -0,4552 | 0,7294 | 0,0000 | 0,0000 |
| ENSG00000167914 | GSDMA    | gasdermin A                                            | 0,7292  | 1,6577 | 0,0000 | 0,0003 |
| ENSG00000073605 | GSDMB    | gasdermin B                                            | 0,4570  | 1,3727 | 0,0008 | 0,0079 |
| ENSG00000104518 | GSDMD    | gasdermin D                                            | 0,4278  | 1,3452 | 0,0007 | 0,0071 |
| ENSG00000131149 | GSE1     | Gse1 coiled-coil protein                               | 0,6436  | 1,5622 | 0,0000 | 0,0000 |
| ENSG00000100744 | GSKIP    | GSK3B interacting protein                              | -0,5189 | 0,6979 | 0,0000 | 0,0000 |
| ENSG00000148180 | GSN      | gelsolin                                               | 0,4479  | 1,3640 | 0,0002 | 0,0029 |
| ENSG00000103342 | GSPT1    | G1 to S phase transition 1                             | -0,4825 | 0,7157 | 0,0000 | 0,0000 |
| ENSG00000148834 | GSTO1    | glutathione S-transferase omega 1                      | -0,4099 | 0,7527 | 0,0000 | 0,0002 |
| ENSG00000065621 | GSTO2    | glutathione S-transferase omega 2                      | 0,4542  | 1,3700 | 0,0001 | 0,0009 |
| ENSG00000188342 | GTF2F2   | general transcription factor IIF, polypeptide 2, 30kDa | -0,6450 | 0,6395 | 0,0000 | 0,0000 |
| ENSG00000110768 | GTF2H1   | general transcription factor IIH, polypeptide 1, 62kDa | -0,4229 | 0,7459 | 0,0000 | 0,0000 |
| ENSG00000227038 | GTF2IP7  | general transcription factor Iii pseudogene 7          | 0,9529  | 1,9357 | 0,0000 | 0,0000 |
| ENSG00000006704 | GTF2IRD1 | GTF2I repeat domain containing 1                       | 0,5489  | 1,4630 | 0,0000 | 0,0000 |
| ENSG00000122034 | GTF3A    | general transcription factor IIIA                      | -0,5841 | 0,6671 | 0,0000 | 0,0000 |
| ENSG00000172432 | GTPBP2   | GTP binding protein 2                                  | 0,5898  | 1,5050 | 0,0000 | 0,0000 |
| ENSG00000107937 | GTPBP4   | GTP binding protein 4                                  | -0,4549 | 0,7296 | 0,0000 | 0,0000 |
| ENSG00000236296 | GUSBP5   | glucuronidase, beta pseudogene 5                       | 0,7773  | 1,7139 | 0,0004 | 0,0039 |
| ENSG00000151233 | GXYLT1   | glucoside xylosyltransferase 1                         | -0,6056 | 0,6572 | 0,0000 | 0,0000 |
| ENSG00000172986 | GXYLT2   | glucoside xylosyltransferase 2                         | 0,6213  | 1,5383 | 0,0000 | 0,0000 |
| ENSG00000165905 | GYLTL1B  | glycosyltransferase-like 1B                            | 0,7490  | 1,6807 | 0,0000 | 0,0000 |
| ENSG00000189060 | H1F0     | H1 histone family, member 0                            | 0,6490  | 1,5680 | 0,0000 | 0,0000 |
| ENSG00000184897 | H1FX     | H1 histone family, member X                            | 0,8790  | 1,8392 | 0,0000 | 0,0000 |
| ENSG00000246705 | H2AFJ    | H2A histone family, member J                           | 0,4813  | 1,3960 | 0,0000 | 0,0005 |
| ENSG00000113648 | H2AFY    | H2A histone family, member Y                           | -0,4153 | 0,7499 | 0,0000 | 0,0000 |
| ENSG00000206527 | HACD2    | 3-hydroxyacyl-CoA dehydratase 2                        | -0,4935 | 0,7103 | 0,0000 | 0,0000 |
| ENSG00000063854 | HAGH     | hydroxyacylglutathione hydrolase                       | 0,4744  | 1,3894 | 0,0001 | 0,0008 |
| ENSG00000224189 | HAGLR    | HOXD antisense growth-associated long non-coding RNA   | 0,6729  | 1,5943 | 0,0000 | 0,0000 |



|                 |           |                                                                                        |         |        |        |        |
|-----------------|-----------|----------------------------------------------------------------------------------------|---------|--------|--------|--------|
| ENSG00000170445 | HARS      | histidyl-tRNA synthetase                                                               | -0,4195 | 0,7477 | 0,0000 | 0,0000 |
| ENSG00000170961 | HAS2      | hyaluronan synthase 2                                                                  | -0,3996 | 0,7581 | 0,0002 | 0,0022 |
| ENSG00000249115 | HAUS5     | HAUS augmin-like complex, subunit 5                                                    | 0,4911  | 1,4056 | 0,0000 | 0,0001 |
| ENSG00000213931 | HBE1      | hemoglobin, epsilon 1                                                                  | 2,6605  | 6,3224 | 0,0000 | 0,0000 |
| ENSG00000196565 | HBG2      | hemoglobin, gamma G                                                                    | 1,6407  | 3,1181 | 0,0000 | 0,0000 |
| ENSG00000105856 | HBP1      | HMG-box transcription factor 1                                                         | 0,6292  | 1,5467 | 0,0000 | 0,0000 |
| ENSG00000103145 | HCFC1R1   | host cell factor C1 regulator 1 (XPO1 dependent)                                       | 1,2520  | 2,3818 | 0,0000 | 0,0000 |
| ENSG00000231074 | HCG18     | HLA complex group 18 (non-protein coding)                                              | -0,3937 | 0,7612 | 0,0000 | 0,0001 |
| ENSG00000099822 | HCN2      | hyperpolarization activated cyclic nucleotide gated potassium channel 2                | 0,9226  | 1,8955 | 0,0000 | 0,0000 |
| ENSG00000126264 | HCST      | hematopoietic cell signal transducer                                                   | 0,6353  | 1,5533 | 0,0001 | 0,0011 |
| ENSG00000163517 | HDAC11    | histone deacetylase 11                                                                 | 0,7557  | 1,6884 | 0,0000 | 0,0000 |
| ENSG00000068024 | HDAC4     | histone deacetylase 4                                                                  | 0,5563  | 1,4705 | 0,0000 | 0,0000 |
| ENSG00000108840 | HDAC5     | histone deacetylase 5                                                                  | 0,6125  | 1,5289 | 0,0000 | 0,0000 |
| ENSG00000048052 | HDAC9     | histone deacetylase 9                                                                  | 1,0921  | 2,1319 | 0,0000 | 0,0000 |
| ENSG00000111906 | HDDC2     | HD domain containing 2                                                                 | -0,4086 | 0,7533 | 0,0000 | 0,0003 |
| ENSG00000155393 | HEATR3    | HEAT repeat containing 3                                                               | -0,4176 | 0,7487 | 0,0000 | 0,0006 |
| ENSG00000173064 | HECTD4    | HECT domain containing E3 ubiquitin protein ligase 4                                   | 0,4125  | 1,3310 | 0,0000 | 0,0004 |
| ENSG00000114735 | HEMK1     | HemK methyltransferase family member 1                                                 | 0,6550  | 1,5747 | 0,0000 | 0,0000 |
| ENSG00000181333 | HEPHL1    | hephaestin-like 1                                                                      | -0,7241 | 0,6054 | 0,0000 | 0,0000 |
| ENSG00000276550 | HERC2P2   | hect domain and RLD 2 pseudogene 2                                                     | -0,4754 | 0,7193 | 0,0003 | 0,0038 |
| ENSG00000206149 | HERC2P9   | hect domain and RLD 2 pseudogene 9                                                     | -0,6849 | 0,6220 | 0,0000 | 0,0001 |
| ENSG00000138641 | HERC3     | HECT and RLD domain containing E3 ubiquitin protein ligase 3                           | 0,4721  | 1,3871 | 0,0000 | 0,0001 |
| ENSG00000144485 | HES6      | hes family bHLH transcription factor 6                                                 | 0,4583  | 1,3740 | 0,0005 | 0,0051 |
| ENSG00000186834 | HEXIM1    | hexamethylene bis-acetamide inducible 1                                                | -0,5136 | 0,7005 | 0,0000 | 0,0000 |
| ENSG00000135547 | HEY2      | hes-related family bHLH transcription factor with YRPW motif 2                         | -0,6007 | 0,6594 | 0,0000 | 0,0000 |
| ENSG00000163909 | HEYL      | hes-related family bHLH transcription factor with YRPW motif-like                      | 0,8468  | 1,7985 | 0,0000 | 0,0000 |
| ENSG00000152804 | HHEX      | hematopoietically expressed homeobox                                                   | -0,4294 | 0,7426 | 0,0005 | 0,0054 |
| ENSG00000114455 | HHLA2     | HERV-H LTR-associating 2                                                               | -0,7434 | 0,5973 | 0,0001 | 0,0010 |
| ENSG00000167861 | HID1      | HID1 domain containing                                                                 | 1,0115  | 2,0161 | 0,0000 | 0,0000 |
| ENSG00000100644 | HIF1A     | hypoxia inducible factor 1, alpha subunit (basic helix-loop-helix transcription factor | -0,5106 | 0,7019 | 0,0000 | 0,0000 |
| ENSG00000258667 | HIF1A-AS2 | HIF1A antisense RNA 2                                                                  | 0,8998  | 1,8658 | 0,0001 | 0,0011 |

|                 |            |                                                               |         |        |        |        |
|-----------------|------------|---------------------------------------------------------------|---------|--------|--------|--------|
| ENSG00000135245 | HILPDA     | hypoxia inducible lipid droplet-associated                    | 0,6771  | 1,5989 | 0,0000 | 0,0000 |
| ENSG00000196787 | HIST1H2AG  | histone cluster 1, H2ag                                       | -0,6073 | 0,6564 | 0,0000 | 0,0004 |
| ENSG00000124635 | HIST1H2BJ  | histone cluster 1, H2bj                                       | -1,1017 | 0,4660 | 0,0000 | 0,0000 |
| ENSG00000197903 | HIST1H2BK  | histone cluster 1, H2bk                                       | -0,9026 | 0,5349 | 0,0000 | 0,0000 |
| ENSG00000273983 | HIST1H3G   | histone cluster 1, H3g                                        | -0,7553 | 0,5924 | 0,0001 | 0,0017 |
| ENSG00000196890 | HIST3H2BB  | histone cluster 3, H2bb                                       | 0,6649  | 1,5855 | 0,0001 | 0,0018 |
| ENSG00000156510 | HKDC1      | hexokinase domain containing 1                                | 0,8652  | 1,8215 | 0,0000 | 0,0000 |
| ENSG00000234745 | HLA-B      | major histocompatibility complex, class I, B                  | -0,4841 | 0,7150 | 0,0000 | 0,0000 |
| ENSG00000242574 | HLA-DMB    | major histocompatibility complex, class II, DM beta           | -0,7665 | 0,5878 | 0,0011 | 0,0097 |
| ENSG00000231389 | HLA-DPA1   | major histocompatibility complex, class II, DP alpha 1        | -1,1949 | 0,4368 | 0,0000 | 0,0002 |
| ENSG00000204287 | HLA-DRA    | major histocompatibility complex, class II, DR alpha          | -1,6292 | 0,3233 | 0,0000 | 0,0000 |
| ENSG00000196126 | HLA-DRB1   | major histocompatibility complex, class II, DR beta 1         | -0,8724 | 0,5462 | 0,0007 | 0,0068 |
| ENSG00000230795 | HLA-K      | major histocompatibility complex, class I, K (pseudogene)     | 0,4402  | 1,3568 | 0,0009 | 0,0083 |
| ENSG00000181126 | HLA-V      | major histocompatibility complex, class I, V (pseudogene)     | 0,7602  | 1,6937 | 0,0000 | 0,0004 |
| ENSG00000233155 | HMGA1P8    | high mobility group AT-hook 1 pseudogene 8 (functional)       | 1,0134  | 2,0187 | 0,0002 | 0,0020 |
| ENSG00000149948 | HMGA2      | high mobility group AT-hook 2                                 | -1,0575 | 0,4805 | 0,0000 | 0,0000 |
| ENSG00000189403 | HMGB1      | high mobility group box 1                                     | -0,7789 | 0,5828 | 0,0000 | 0,0000 |
| ENSG00000132967 | HMGB1P5    | high mobility group box 1 pseudogene 5                        | -0,7521 | 0,5937 | 0,0001 | 0,0008 |
| ENSG00000259699 | HMGB1P8    | high mobility group box 1 pseudogene 8                        | -0,7890 | 0,5787 | 0,0000 | 0,0000 |
| ENSG0000029993  | HMGB3      | high mobility group box 3                                     | -0,6415 | 0,6410 | 0,0000 | 0,0000 |
| ENSG00000117305 | HMGCL      | 3-hydroxymethyl-3-methylglutaryl-CoA lyase                    | 0,5801  | 1,4949 | 0,0000 | 0,0000 |
| ENSG00000205581 | HMGN1      | high mobility group nucleosome binding domain 1               | -0,4099 | 0,7527 | 0,0000 | 0,0003 |
| ENSG00000198830 | HMGN2      | high mobility group nucleosomal binding domain 2              | -0,6119 | 0,6543 | 0,0000 | 0,0000 |
| ENSG00000212769 | HMGN2P8    | high mobility group nucleosomal binding domain 2 pseudogene 8 | -0,5641 | 0,6764 | 0,0000 | 0,0002 |
| ENSG00000072571 | HMMR       | hyaluronan-mediated motility receptor (RHAMM)                 | -0,5451 | 0,6853 | 0,0000 | 0,0000 |
| ENSG00000101076 | HNF4A      | hepatocyte nuclear factor 4, alpha                            | -0,3909 | 0,7626 | 0,0002 | 0,0022 |
| ENSG00000213412 | HNRNPA1P33 | heterogeneous nuclear ribonucleoprotein A1 pseudogene 33      | -0,7849 | 0,5804 | 0,0004 | 0,0043 |
| ENSG00000122566 | HNRNPA2B1  | heterogeneous nuclear ribonucleoprotein A2/B1                 | -0,5514 | 0,6823 | 0,0000 | 0,0000 |
| ENSG00000197451 | HNRNPAB    | heterogeneous nuclear ribonucleoprotein A/B                   | -0,4410 | 0,7366 | 0,0000 | 0,0001 |
| ENSG00000169045 | HNRNPH1    | heterogeneous nuclear ribonucleoprotein H1 (H)                | -0,3882 | 0,7641 | 0,0000 | 0,0001 |
| ENSG00000096746 | HNRNPH3    | heterogeneous nuclear ribonucleoprotein H3 (2H9)              | -0,3800 | 0,7684 | 0,0000 | 0,0003 |

|                 |            |                                                              |         |        |        |        |
|-----------------|------------|--------------------------------------------------------------|---------|--------|--------|--------|
| ENSG00000165119 | HNRNPK     | heterogeneous nuclear ribonucleoprotein K                    | -0,5143 | 0,7001 | 0,0000 | 0,0000 |
| ENSG00000099783 | HNRNPM     | heterogeneous nuclear ribonucleoprotein M                    | -0,4129 | 0,7511 | 0,0000 | 0,0000 |
| ENSG00000241935 | HOGA1      | 4-hydroxy-2-oxoglutarate aldolase 1                          | 1,2605  | 2,3959 | 0,0000 | 0,0000 |
| ENSG00000152413 | HOMER1     | homer scaffolding protein 1                                  | -0,5849 | 0,6667 | 0,0000 | 0,0000 |
| ENSG00000103942 | HOMER2     | homer scaffolding protein 2                                  | 0,5199  | 1,4339 | 0,0004 | 0,0042 |
| ENSG00000051128 | HOMER3     | homer scaffolding protein 3                                  | 0,6821  | 1,6044 | 0,0000 | 0,0000 |
| ENSG00000233429 | HOTAIRM1   | HOXA transcript antisense RNA, myeloid-specific 1            | -0,7699 | 0,5865 | 0,0000 | 0,0000 |
| ENSG00000105991 | HOXA1      | homeobox A1                                                  | -1,0670 | 0,4773 | 0,0000 | 0,0000 |
| ENSG00000005073 | HOXA11     | homeobox A11                                                 | -0,4455 | 0,7343 | 0,0000 | 0,0002 |
| ENSG00000105996 | HOXA2      | homeobox A2                                                  | -0,7262 | 0,6045 | 0,0007 | 0,0066 |
| ENSG00000037965 | HOXC8      | homeobox C8                                                  | -0,5118 | 0,7013 | 0,0000 | 0,0005 |
| ENSG00000128710 | HOXD10     | homeobox D10                                                 | -0,4766 | 0,7187 | 0,0002 | 0,0020 |
| ENSG00000128713 | HOXD11     | homeobox D11                                                 | -0,7173 | 0,6082 | 0,0001 | 0,0014 |
| ENSG00000128714 | HOXD13     | homeobox D13                                                 | -1,0443 | 0,4849 | 0,0000 | 0,0000 |
| ENSG00000175879 | HOXD8      | homeobox D8                                                  | 0,5823  | 1,4973 | 0,0002 | 0,0021 |
| ENSG00000116983 | HPCAL4     | hippocalcin like 4                                           | 0,7873  | 1,7258 | 0,0001 | 0,0008 |
| ENSG00000164120 | HPGD       | hydroxyprostaglandin dehydrogenase 15-(NAD)                  | -0,8197 | 0,5666 | 0,0000 | 0,0000 |
| ENSG00000132541 | HRSP12     | heat-responsive protein 12                                   | -0,4230 | 0,7459 | 0,0000 | 0,0005 |
| ENSG00000118960 | HS1BP3     | HCLS1 binding protein 3                                      | 0,6284  | 1,5458 | 0,0000 | 0,0000 |
| ENSG00000231948 | HS1BP3-IT1 | HS1BP3 intronic transcript 1                                 | -0,7024 | 0,6145 | 0,0000 | 0,0000 |
| ENSG00000149084 | HSD17B12   | hydroxysteroid (17-beta) dehydrogenase 12                    | -0,4101 | 0,7526 | 0,0000 | 0,0000 |
| ENSG00000204228 | HSD17B8    | hydroxysteroid (17-beta) dehydrogenase 8                     | 0,5467  | 1,4607 | 0,0000 | 0,0001 |
| ENSG00000103160 | HSDL1      | hydroxysteroid dehydrogenase like 1                          | 0,4130  | 1,3314 | 0,0000 | 0,0001 |
| ENSG00000102878 | HSF4       | heat shock transcription factor 4                            | 0,6240  | 1,5411 | 0,0005 | 0,0050 |
| ENSG00000196684 | HSH2D      | hematopoietic SH2 domain containing                          | 0,4523  | 1,3682 | 0,0001 | 0,0010 |
| ENSG00000080824 | HSP90AA1   | heat shock protein 90kDa alpha (cytosolic), class A member 1 | -0,5448 | 0,6855 | 0,0000 | 0,0000 |
| ENSG00000109971 | HSPA8      | heat shock 70kDa protein 8                                   | -0,9530 | 0,5165 | 0,0000 | 0,0000 |
| ENSG00000106211 | HSPB1      | heat shock 27kDa protein 1                                   | 0,4949  | 1,4092 | 0,0001 | 0,0014 |
| ENSG00000144381 | HSPD1      | heat shock 60kDa protein 1 (chaperonin)                      | -0,4179 | 0,7485 | 0,0001 | 0,0008 |
| ENSG00000120694 | HSPH1      | heat shock 105kDa/110kDa protein 1                           | -0,7949 | 0,5764 | 0,0000 | 0,0000 |
| ENSG00000166033 | HTRA1      | HtrA serine peptidase 1                                      | 0,4717  | 1,3868 | 0,0002 | 0,0023 |

|                 |         |                                                                               |         |        |        |        |
|-----------------|---------|-------------------------------------------------------------------------------|---------|--------|--------|--------|
| ENSG00000114378 | HYAL1   | hyaluronoglucosaminidase 1                                                    | 0,4949  | 1,4092 | 0,0001 | 0,0012 |
| ENSG00000186792 | HYAL3   | hyaluronoglucosaminidase 3                                                    | -0,6495 | 0,6375 | 0,0000 | 0,0001 |
| ENSG00000090339 | ICAM1   | intercellular adhesion molecule 1                                             | -0,4179 | 0,7485 | 0,0000 | 0,0000 |
| ENSG00000115738 | ID2     | inhibitor of DNA binding 2, dominant negative helix-loop-helix protein        | -0,4570 | 0,7285 | 0,0000 | 0,0001 |
| ENSG00000235092 | ID2-AS1 | ID2 antisense RNA 1 (head to head)                                            | -0,6102 | 0,6551 | 0,0007 | 0,0073 |
| ENSG00000119912 | IDE     | insulin-degrading enzyme                                                      | -0,4874 | 0,7133 | 0,0000 | 0,0000 |
| ENSG00000166411 | IDH3A   | isocitrate dehydrogenase 3 (NAD+) alpha                                       | -0,4769 | 0,7185 | 0,0000 | 0,0000 |
| ENSG00000067064 | IDI1    | isopentenyl-diphosphate delta isomerase 1                                     | -0,4758 | 0,7190 | 0,0000 | 0,0000 |
| ENSG00000169991 | IFFO2   | intermediate filament family orphan 2                                         | -0,4644 | 0,7248 | 0,0000 | 0,0000 |
| ENSG00000165949 | IFI27   | interferon, alpha-inducible protein 27                                        | 1,4982  | 2,8248 | 0,0000 | 0,0000 |
| ENSG00000165948 | IFI27L1 | interferon, alpha-inducible protein 27-like 1                                 | 0,3831  | 1,3042 | 0,0003 | 0,0038 |
| ENSG00000119632 | IFI27L2 | interferon, alpha-inducible protein 27-like 2                                 | 0,6052  | 1,5212 | 0,0000 | 0,0000 |
| ENSG00000068079 | IFI35   | interferon-induced protein 35                                                 | 0,6815  | 1,6038 | 0,0000 | 0,0000 |
| ENSG00000126709 | IFI6    | interferon, alpha-inducible protein 6                                         | 0,7195  | 1,6466 | 0,0000 | 0,0000 |
| ENSG00000142166 | IFNAR1  | interferon (alpha, beta and omega) receptor 1                                 | -0,3833 | 0,7667 | 0,0000 | 0,0000 |
| ENSG00000006652 | IFRD1   | interferon-related developmental regulator 1                                  | -0,3914 | 0,7624 | 0,0000 | 0,0005 |
| ENSG00000187535 | IFT140  | intraflagellar transport 140                                                  | 0,8043  | 1,7463 | 0,0000 | 0,0000 |
| ENSG00000138002 | IFT172  | intraflagellar transport 172                                                  | 0,6022  | 1,5181 | 0,0000 | 0,0000 |
| ENSG00000032742 | IFT88   | intraflagellar transport 88                                                   | -0,4337 | 0,7403 | 0,0000 | 0,0006 |
| ENSG00000017427 | IGF1    | insulin-like growth factor 1 (somatomedin C)                                  | 1,3973  | 2,6340 | 0,0000 | 0,0000 |
| ENSG00000140443 | IGF1R   | insulin-like growth factor 1 receptor                                         | 0,6509  | 1,5701 | 0,0000 | 0,0000 |
| ENSG00000115457 | IGFBP2  | insulin-like growth factor binding protein 2, 36kDa                           | 0,8443  | 1,7954 | 0,0000 | 0,0000 |
| ENSG00000163453 | IGFBP7  | insulin-like growth factor binding protein 7                                  | -0,4416 | 0,7363 | 0,0000 | 0,0001 |
| ENSG00000204869 | IGFL4   | IGF-like family member 4                                                      | 0,5750  | 1,4896 | 0,0000 | 0,0000 |
| ENSG00000163395 | IGFN1   | immunoglobulin-like and fibronectin type III domain containing 1              | 0,9078  | 1,8762 | 0,0006 | 0,0063 |
| ENSG00000162729 | IGSF8   | immunoglobulin superfamily, member 8                                          | 0,6849  | 1,6076 | 0,0000 | 0,0000 |
| ENSG00000166130 | IKBIP   | IKKB interacting protein                                                      | -0,4618 | 0,7261 | 0,0000 | 0,0000 |
| ENSG00000263528 | IKBKE   | inhibitor of kappa light polypeptide gene enhancer in B-cells, kinase epsilon | -0,7462 | 0,5962 | 0,0000 | 0,0000 |
| ENSG00000110324 | IL10RA  | interleukin 10 receptor, alpha                                                | 1,0647  | 2,0917 | 0,0000 | 0,0000 |
| ENSG00000081985 | IL12RB2 | interleukin 12 receptor, beta 2                                               | 0,6698  | 1,5909 | 0,0006 | 0,0061 |
| ENSG00000172349 | IL16    | interleukin 16                                                                | 0,6416  | 1,5600 | 0,0000 | 0,0000 |

|                 |        |                                                  |         |        |        |        |
|-----------------|--------|--------------------------------------------------|---------|--------|--------|--------|
| ENSG00000056736 | IL17RB | interleukin 17 receptor B                        | 0,6547  | 1,5743 | 0,0000 | 0,0000 |
| ENSG00000163702 | IL17RC | interleukin 17 receptor C                        | 0,6696  | 1,5907 | 0,0000 | 0,0000 |
| ENSG00000144730 | IL17RD | interleukin 17 receptor D                        | -0,4884 | 0,7128 | 0,0000 | 0,0000 |
| ENSG00000142224 | IL19   | interleukin 19                                   | -0,8174 | 0,5675 | 0,0000 | 0,0005 |
| ENSG00000196083 | IL1RAP | interleukin 1 receptor accessory protein         | -0,8202 | 0,5664 | 0,0000 | 0,0000 |
| ENSG00000103522 | IL21R  | interleukin 21 receptor                          | 1,9933  | 3,9813 | 0,0000 | 0,0000 |
| ENSG00000162892 | IL24   | interleukin 24                                   | 0,4183  | 1,3364 | 0,0001 | 0,0012 |
| ENSG00000008517 | IL32   | interleukin 32                                   | -0,7753 | 0,5843 | 0,0000 | 0,0003 |
| ENSG00000134352 | IL6ST  | interleukin 6 signal transducer                  | -0,7050 | 0,6134 | 0,0000 | 0,0000 |
| ENSG00000145103 | ILDR1  | immunoglobulin-like domain containing receptor 1 | 0,6597  | 1,5797 | 0,0000 | 0,0000 |
| ENSG00000143621 | ILF2   | interleukin enhancer binding factor 2            | -0,3835 | 0,7666 | 0,0001 | 0,0015 |
| ENSG00000184903 | IMMP2L | inner mitochondrial membrane peptidase subunit 2 | 0,4809  | 1,3956 | 0,0007 | 0,0071 |
| ENSG00000178035 | IMPDH2 | IMP (inosine 5'-monophosphate) dehydrogenase 2   | 0,4311  | 1,3482 | 0,0000 | 0,0000 |
| ENSG00000259330 | INAFM2 | InaF-motif containing 2                          | -0,6596 | 0,6331 | 0,0000 | 0,0000 |
| ENSG00000153487 | ING1   | inhibitor of growth family, member 1             | -0,4963 | 0,7089 | 0,0000 | 0,0000 |
| ENSG00000111653 | ING4   | inhibitor of growth family, member 4             | 0,7785  | 1,7153 | 0,0000 | 0,0000 |
| ENSG00000123999 | INHHA  | inhibin, alpha                                   | 0,5159  | 1,4299 | 0,0006 | 0,0061 |
| ENSG00000163083 | INHBB  | inhibin, beta B                                  | 0,8206  | 1,7661 | 0,0000 | 0,0000 |
| ENSG00000139269 | INHBE  | inhibin, beta E                                  | 2,0149  | 4,0417 | 0,0000 | 0,0000 |
| ENSG00000151689 | INPP1  | inositol polyphosphate-1-phosphatase             | -0,5939 | 0,6625 | 0,0000 | 0,0000 |
| ENSG00000109452 | INPP4B | inositol polyphosphate-4-phosphatase type II B   | 0,7158  | 1,6424 | 0,0000 | 0,0000 |
| ENSG00000148384 | INPP5E | inositol polyphosphate-5-phosphatase E           | 0,4350  | 1,3520 | 0,0000 | 0,0007 |
| ENSG00000185133 | INPP5J | inositol polyphosphate-5-phosphatase J           | 1,1211  | 2,1752 | 0,0000 | 0,0000 |
| ENSG00000186480 | INSIG1 | insulin induced gene 1                           | 0,4489  | 1,3650 | 0,0000 | 0,0000 |
| ENSG00000171105 | INSR   | insulin receptor                                 | 0,3954  | 1,3153 | 0,0001 | 0,0010 |
| ENSG00000185085 | INTS5  | integrator complex subunit 5                     | 0,4734  | 1,3884 | 0,0000 | 0,0000 |
| ENSG00000086200 | IPO11  | importin 11                                      | -0,4175 | 0,7487 | 0,0000 | 0,0002 |
| ENSG00000196497 | IPO4   | importin 4                                       | -0,4572 | 0,7284 | 0,0006 | 0,0061 |
| ENSG00000065150 | IPO5   | importin 5                                       | -1,0791 | 0,4733 | 0,0000 | 0,0000 |
| ENSG00000166578 | IQCD   | IQ motif containing D                            | 0,8049  | 1,7471 | 0,0000 | 0,0006 |
| ENSG00000103599 | IQCH   | IQ motif containing H                            | 0,5758  | 1,4905 | 0,0007 | 0,0071 |

|                 |               |                                                               |         |        |        |        |
|-----------------|---------------|---------------------------------------------------------------|---------|--------|--------|--------|
| ENSG00000120645 | IQSEC3        | IQ motif and Sec7 domain 3                                    | 0,9142  | 1,8846 | 0,0003 | 0,0031 |
| ENSG00000146243 | IRAK1BP1      | interleukin-1 receptor-associated kinase 1 binding protein 1  | 0,5779  | 1,4927 | 0,0000 | 0,0000 |
| ENSG00000128604 | IRF5          | interferon regulatory factor 5                                | 0,4979  | 1,4122 | 0,0000 | 0,0002 |
| ENSG00000117595 | IRF6          | interferon regulatory factor 6                                | 0,7027  | 1,6275 | 0,0000 | 0,0000 |
| ENSG00000185507 | IRF7          | interferon regulatory factor 7                                | 0,6191  | 1,5359 | 0,0001 | 0,0015 |
| ENSG00000169047 | IRS1          | insulin receptor substrate 1                                  | -0,3979 | 0,7590 | 0,0003 | 0,0034 |
| ENSG00000185950 | IRS2          | insulin receptor substrate 2                                  | -0,9762 | 0,5083 | 0,0000 | 0,0000 |
| ENSG00000176842 | IRX5          | iroquois homeobox 5                                           | 0,8698  | 1,8274 | 0,0000 | 0,0000 |
| ENSG00000143319 | ISG20L2       | interferon stimulated exonuclease gene 20kDa-like 2           | -0,5136 | 0,7005 | 0,0000 | 0,0000 |
| ENSG0000016082  | ISL1          | ISL LIM homeobox 1                                            | -1,0922 | 0,4690 | 0,0000 | 0,0000 |
| ENSG00000100593 | ISM2          | isthmin 2                                                     | 0,6262  | 1,5435 | 0,0000 | 0,0000 |
| ENSG00000143127 | ITGA10        | integrin, alpha 10                                            | 1,2484  | 2,3758 | 0,0000 | 0,0000 |
| ENSG00000164171 | ITGA2         | integrin, alpha 2 (CD49B, alpha 2 subunit of VLA-2 receptor)  | -0,5529 | 0,6817 | 0,0000 | 0,0000 |
| ENSG00000161638 | ITGA5         | integrin, alpha 5 (fibronectin receptor, alpha polypeptide)   | 0,5860  | 1,5011 | 0,0000 | 0,0000 |
| ENSG00000091409 | ITGA6         | integrin, alpha 6                                             | -0,6145 | 0,6531 | 0,0000 | 0,0000 |
| ENSG00000140678 | ITGAX         | integrin, alpha X (complement component 3 receptor 4 subunit) | 1,0175  | 2,0245 | 0,0001 | 0,0011 |
| ENSG00000147166 | ITGB1BP2      | integrin beta 1 binding protein (melusin) 2                   | -0,6688 | 0,6290 | 0,0002 | 0,0027 |
| ENSG00000115221 | ITGB6         | integrin, beta 6                                              | 1,0503  | 2,0710 | 0,0000 | 0,0000 |
| ENSG00000136156 | ITM2B         | integral membrane protein 2B                                  | -0,4180 | 0,7484 | 0,0000 | 0,0002 |
| ENSG00000123104 | ITPR2         | inositol 1,4,5-trisphosphate receptor, type 2                 | -0,6747 | 0,6265 | 0,0000 | 0,0000 |
| ENSG00000099840 | IZUMO4        | IZUMO family member 4                                         | 1,1640  | 2,2408 | 0,0000 | 0,0000 |
| ENSG00000101384 | JAG1          | jagged 1                                                      | -0,4288 | 0,7429 | 0,0000 | 0,0000 |
| ENSG00000184916 | JAG2          | jagged 2                                                      | 0,8444  | 1,7955 | 0,0000 | 0,0000 |
| ENSG00000105639 | JAK3          | Janus kinase 3                                                | 0,6257  | 1,5430 | 0,0000 | 0,0001 |
| ENSG00000280780 | JAKMIP2-AS1   | JAKMIP2 antisense RNA 1                                       | 0,9677  | 1,9558 | 0,0003 | 0,0035 |
| ENSG00000188385 | JAKMIP3       | Janus kinase and microtubule interacting protein 3            | 1,1107  | 2,1595 | 0,0000 | 0,0000 |
| ENSG00000168970 | JMJD7-PLA2G4B | JMJD7-PLA2G4B readthrough                                     | 0,6922  | 1,6158 | 0,0001 | 0,0017 |
| ENSG00000152409 | JMY           | junction mediating and regulatory protein, p53 cofactor       | 0,5110  | 1,4250 | 0,0000 | 0,0000 |
| ENSG00000130522 | JUND          | jun D proto-oncogene                                          | 0,4942  | 1,4085 | 0,0000 | 0,0000 |
| ENSG00000173801 | JUP           | junction plakoglobin                                          | 0,4398  | 1,3564 | 0,0001 | 0,0019 |
| ENSG00000197256 | KANK2         | KN motif and ankyrin repeat domains 2                         | 0,5316  | 1,4455 | 0,0000 | 0,0000 |

|                 |           |                                                                                 |         |        |        |        |
|-----------------|-----------|---------------------------------------------------------------------------------|---------|--------|--------|--------|
| ENSG00000132854 | KANK4     | KN motif and ankyrin repeat domains 4                                           | -0,9543 | 0,5161 | 0,0002 | 0,0029 |
| ENSG00000144445 | KANSL1L   | KAT8 regulatory NSL complex subunit 1-like                                      | 0,4201  | 1,3380 | 0,0000 | 0,0006 |
| ENSG00000165572 | KBTBD6    | kelch repeat and BTB (POZ) domain containing 6                                  | -0,4741 | 0,7199 | 0,0000 | 0,0000 |
| ENSG00000163376 | KBTBD8    | kelch repeat and BTB (POZ) domain containing 8                                  | -0,9048 | 0,5341 | 0,0000 | 0,0000 |
| ENSG00000069424 | KCNAB2    | potassium channel, voltage gated subfamily A regulatory beta subunit 2          | 1,3254  | 2,5060 | 0,0000 | 0,0000 |
| ENSG00000116396 | KCNC4     | potassium channel, voltage gated Shaw related subfamily C, member 4             | 0,5051  | 1,4192 | 0,0000 | 0,0000 |
| ENSG00000026559 | KCNG1     | potassium channel, voltage gated modifier subfamily G, member 1                 | 0,6705  | 1,5916 | 0,0000 | 0,0001 |
| ENSG00000055118 | KCNH2     | potassium channel, voltage gated eag related subfamily H, member 2              | 1,0624  | 2,0884 | 0,0000 | 0,0000 |
| ENSG00000177807 | KCNJ10    | potassium channel, inwardly rectifying subfamily J, member 10                   | 0,6878  | 1,6109 | 0,0000 | 0,0000 |
| ENSG00000187486 | KCNJ11    | potassium channel, inwardly rectifying subfamily J, member 11                   | 1,0039  | 2,0055 | 0,0000 | 0,0000 |
| ENSG00000184185 | KCNJ12    | potassium channel, inwardly rectifying subfamily J, member 12                   | 0,6162  | 1,5329 | 0,0000 | 0,0000 |
| ENSG00000120457 | KCNJ5     | potassium channel, inwardly rectifying subfamily J, member 5                    | -0,4304 | 0,7421 | 0,0000 | 0,0004 |
| ENSG00000100433 | KCNK10    | potassium channel, two pore domain subfamily K, member 10                       | 1,0181  | 2,0252 | 0,0000 | 0,0005 |
| ENSG00000171303 | KCNK3     | potassium channel, two pore domain subfamily K, member 3                        | 0,7403  | 1,6705 | 0,0005 | 0,0049 |
| ENSG00000099337 | KCNK6     | potassium channel, two pore domain subfamily K, member 6                        | -0,6149 | 0,6530 | 0,0000 | 0,0000 |
| ENSG00000171121 | KCNMB3    | potassium channel subfamily M regulatory beta subunit 3                         | -0,7917 | 0,5777 | 0,0008 | 0,0075 |
| ENSG00000105642 | KCNN1     | potassium channel, calcium activated intermediate/small conductance subfamily N | 0,8823  | 1,8433 | 0,0006 | 0,0058 |
| ENSG00000185760 | KCNQ5     | potassium channel, voltage gated KQT-like subfamily Q, member 5                 | 0,9937  | 1,9913 | 0,0003 | 0,0032 |
| ENSG00000170745 | KCNS3     | potassium voltage-gated channel, modifier subfamily S, member 3                 | 0,5230  | 1,4370 | 0,0000 | 0,0000 |
| ENSG00000178695 | KCTD12    | potassium channel tetramerization domain containing 12                          | -1,0463 | 0,4842 | 0,0000 | 0,0000 |
| ENSG00000134901 | KDELC1    | KDEL (Lys-Asp-Glu-Leu) containing 1                                             | -0,5748 | 0,6714 | 0,0002 | 0,0022 |
| ENSG00000136240 | KDELR2    | KDEL (Lys-Asp-Glu-Leu) endoplasmic reticulum protein retention receptor 2       | -0,4154 | 0,7498 | 0,0000 | 0,0001 |
| ENSG00000066135 | KDM4A     | lysine (K)-specific demethylase 4A                                              | 0,3789  | 1,3004 | 0,0000 | 0,0001 |
| ENSG00000127663 | KDM4B     | lysine (K)-specific demethylase 4B                                              | 0,5338  | 1,4477 | 0,0000 | 0,0004 |
| ENSG00000132510 | KDM6B     | lysine (K)-specific demethylase 6B                                              | 0,5724  | 1,4870 | 0,0000 | 0,0000 |
| ENSG00000131773 | KHDRBS3   | KH domain containing, RNA binding, signal transduction associated 3             | -0,4240 | 0,7454 | 0,0002 | 0,0019 |
| ENSG00000102445 | KIAA0226L | KIAA0226-like                                                                   | -0,6403 | 0,6416 | 0,0000 | 0,0000 |
| ENSG00000100890 | KIAA0391  | KIAA0391                                                                        | -0,6428 | 0,6405 | 0,0000 | 0,0000 |
| ENSG00000166783 | KIAA0430  | KIAA0430                                                                        | 0,3883  | 1,3089 | 0,0000 | 0,0001 |
| ENSG00000135709 | KIAA0513  | KIAA0513                                                                        | 0,7582  | 1,6914 | 0,0000 | 0,0002 |
| ENSG00000069712 | KIAA1107  | KIAA1107                                                                        | 1,2222  | 2,3330 | 0,0000 | 0,0000 |

|                 |           |                                                               |         |        |        |        |
|-----------------|-----------|---------------------------------------------------------------|---------|--------|--------|--------|
| ENSG00000109265 | KIAA1211  | KIAA1211                                                      | 0,4853  | 1,3999 | 0,0000 | 0,0004 |
| ENSG00000134444 | KIAA1468  | KIAA1468                                                      | -0,4080 | 0,7537 | 0,0001 | 0,0012 |
| ENSG00000163507 | KIAA1524  | KIAA1524                                                      | -0,4484 | 0,7328 | 0,0000 | 0,0000 |
| ENSG00000110427 | KIAA1549L | KIAA1549-like                                                 | -1,4684 | 0,3614 | 0,0000 | 0,0000 |
| ENSG00000173214 | KIAA1919  | KIAA1919                                                      | -0,3916 | 0,7623 | 0,0009 | 0,0086 |
| ENSG00000136883 | KIF12     | kinesin family member 12                                      | 0,7888  | 1,7276 | 0,0009 | 0,0081 |
| ENSG00000197892 | KIF13B    | kinesin family member 13B                                     | 0,3894  | 1,3099 | 0,0001 | 0,0016 |
| ENSG00000118193 | KIF14     | kinesin family member 14                                      | -0,4372 | 0,7386 | 0,0000 | 0,0000 |
| ENSG00000130294 | KIF1A     | kinesin family member 1A                                      | 0,5009  | 1,4151 | 0,0000 | 0,0003 |
| ENSG00000138182 | KIF20B    | kinesin family member 20B                                     | -0,5176 | 0,6985 | 0,0000 | 0,0000 |
| ENSG00000186638 | KIF24     | kinesin family member 24                                      | 0,3894  | 1,3099 | 0,0000 | 0,0002 |
| ENSG00000066735 | KIF26A    | kinesin family member 26A                                     | 0,7187  | 1,6457 | 0,0000 | 0,0005 |
| ENSG00000084731 | KIF3C     | kinesin family member 3C                                      | 0,7699  | 1,7052 | 0,0000 | 0,0000 |
| ENSG00000090889 | KIF4A     | kinesin family member 4A                                      | -0,5830 | 0,6676 | 0,0000 | 0,0000 |
| ENSG00000155980 | KIF5A     | kinesin family member 5A                                      | 0,8616  | 1,8170 | 0,0010 | 0,0095 |
| ENSG00000167702 | KIFC2     | kinesin family member C2                                      | 0,5177  | 1,4317 | 0,0001 | 0,0011 |
| ENSG00000140859 | KIFC3     | kinesin family member C3                                      | -0,4130 | 0,7510 | 0,0007 | 0,0069 |
| ENSG00000116014 | KISS1R    | KISS1 receptor                                                | 2,0113  | 4,0314 | 0,0000 | 0,0000 |
| ENSG00000157404 | KIT       | v-kit Hardy-Zuckerman 4 feline sarcoma viral oncogene homolog | 1,3402  | 2,5318 | 0,0000 | 0,0000 |
| ENSG00000104892 | KLC3      | kinesin light chain 3                                         | 0,5871  | 1,5022 | 0,0002 | 0,0024 |
| ENSG00000137171 | KLC4      | kinesin light chain 4                                         | 0,5766  | 1,4913 | 0,0000 | 0,0000 |
| ENSG00000127528 | KLF2      | Kruppel-like factor 2                                         | 0,7418  | 1,6723 | 0,0003 | 0,0038 |
| ENSG00000118263 | KLF7      | Kruppel-like factor 7 (ubiquitous)                            | 0,8986  | 1,8642 | 0,0000 | 0,0000 |
| ENSG00000130487 | KLHDC7B   | kelch domain containing 7B                                    | 1,6540  | 3,1471 | 0,0000 | 0,0000 |
| ENSG00000003096 | KLHL13    | kelch-like family member 13                                   | -0,9538 | 0,5163 | 0,0000 | 0,0007 |
| ENSG00000099910 | KLHL22    | kelch-like family member 22                                   | 0,5206  | 1,4345 | 0,0000 | 0,0000 |
| ENSG00000114796 | KLHL24    | kelch-like family member 24                                   | 1,0190  | 2,0265 | 0,0000 | 0,0000 |
| ENSG00000087448 | KLHL42    | kelch-like family member 42                                   | -0,5136 | 0,7005 | 0,0000 | 0,0000 |
| ENSG00000167748 | KLK1      | kallikrein 1                                                  | 0,4674  | 1,3826 | 0,0000 | 0,0001 |
| ENSG00000169035 | KLK7      | kallikrein-related peptidase 7                                | 1,3280  | 2,5105 | 0,0000 | 0,0000 |
| ENSG00000182481 | KPNA2     | karyopherin alpha 2 (RAG cohort 1, importin alpha 1)          | -0,4382 | 0,7380 | 0,0000 | 0,0001 |



|                 |          |                                                            |         |        |        |        |
|-----------------|----------|------------------------------------------------------------|---------|--------|--------|--------|
| ENSG00000102753 | KPNA3    | karyopherin alpha 3 (importin alpha 4)                     | -0,6941 | 0,6181 | 0,0000 | 0,0000 |
| ENSG00000186432 | KPNA4    | karyopherin alpha 4 (importin alpha 3)                     | -0,5941 | 0,6625 | 0,0000 | 0,0000 |
| ENSG00000184619 | KRBA2    | KRAB-A domain containing 2                                 | 0,8643  | 1,8205 | 0,0010 | 0,0094 |
| ENSG00000183762 | KREMEN1  | kringle containing transmembrane protein 1                 | 1,0806  | 2,1149 | 0,0000 | 0,0000 |
| ENSG00000226145 | KRT16P6  | keratin 16 pseudogene 6                                    | 1,2013  | 2,2995 | 0,0000 | 0,0000 |
| ENSG00000128422 | KRT17    | keratin 17, type I                                         | -1,1967 | 0,4363 | 0,0000 | 0,0000 |
| ENSG00000094796 | KRT31    | keratin 31, type I                                         | 0,9947  | 1,9926 | 0,0001 | 0,0013 |
| ENSG00000171360 | KRT38    | keratin 38, type I                                         | 1,0283  | 2,0396 | 0,0002 | 0,0019 |
| ENSG00000186081 | KRT5     | keratin 5, type II                                         | -0,6905 | 0,6196 | 0,0000 | 0,0000 |
| ENSG00000205420 | KRT6A    | keratin 6A, type II                                        | -0,9534 | 0,5164 | 0,0000 | 0,0000 |
| ENSG00000139648 | KRT71    | keratin 71, type II                                        | -1,1752 | 0,4428 | 0,0000 | 0,0000 |
| ENSG00000205426 | KRT81    | keratin 81, type II                                        | 1,2035  | 2,3030 | 0,0000 | 0,0000 |
| ENSG00000170442 | KRT86    | keratin 86, type II                                        | 1,0528  | 2,0745 | 0,0000 | 0,0000 |
| ENSG00000229320 | KRT8P12  | keratin 8 pseudogene 12                                    | -0,4080 | 0,7537 | 0,0001 | 0,0017 |
| ENSG00000212901 | KRTAP3-1 | keratin associated protein 3-1                             | 0,8087  | 1,7517 | 0,0001 | 0,0013 |
| ENSG00000126777 | KTN1     | kinectin 1 (kinesin receptor)                              | -0,6386 | 0,6424 | 0,0000 | 0,0000 |
| ENSG00000126790 | L3HYPDH  | L-3-hydroxyproline dehydratase (trans-)                    | -0,4991 | 0,7076 | 0,0000 | 0,0002 |
| ENSG00000179630 | LACC1    | laccase (multicopper oxidoreductase) domain containing 1   | -0,7611 | 0,5900 | 0,0000 | 0,0000 |
| ENSG00000159166 | LAD1     | ladinin 1                                                  | -0,5597 | 0,6784 | 0,0000 | 0,0000 |
| ENSG00000196976 | LAGE3    | L antigen family, member 3                                 | 0,4336  | 1,3506 | 0,0000 | 0,0003 |
| ENSG00000167618 | LAIR2    | leukocyte-associated immunoglobulin-like receptor 2        | 1,0624  | 2,0883 | 0,0001 | 0,0014 |
| ENSG00000172037 | LAMB2    | laminin, beta 2 (laminin 5)                                | 0,4622  | 1,3776 | 0,0002 | 0,0024 |
| ENSG00000196878 | LAMB3    | laminin, beta 3                                            | 0,4501  | 1,3661 | 0,0001 | 0,0014 |
| ENSG00000185896 | LAMP1    | lysosomal-associated membrane protein 1                    | -0,8993 | 0,5361 | 0,0000 | 0,0000 |
| ENSG00000078081 | LAMP3    | lysosomal-associated membrane protein 3                    | 1,0368  | 2,0517 | 0,0000 | 0,0000 |
| ENSG00000132434 | LANCL2   | LanC lantibiotic synthetase component C-like 2 (bacterial) | -0,4530 | 0,7305 | 0,0000 | 0,0001 |
| ENSG00000162511 | LAPTM5   | lysosomal protein transmembrane 5                          | -0,4657 | 0,7241 | 0,0000 | 0,0005 |
| ENSG00000161813 | LARP4    | La ribonucleoprotein domain family, member 4               | -0,4167 | 0,7491 | 0,0000 | 0,0000 |
| ENSG00000150457 | LATS2    | large tumor suppressor kinase 2                            | -0,6754 | 0,6262 | 0,0000 | 0,0000 |
| ENSG00000143815 | LBR      | lamin B receptor                                           | -0,7694 | 0,5867 | 0,0000 | 0,0000 |
| ENSG00000157578 | LCA5L    | Leber congenital amaurosis 5-like                          | 0,7497  | 1,6815 | 0,0000 | 0,0000 |

|                 |           |                                                                                   |         |        |        |        |
|-----------------|-----------|-----------------------------------------------------------------------------------|---------|--------|--------|--------|
| ENSG00000168806 | LCMT2     | leucine carboxyl methyltransferase 2                                              | -0,3976 | 0,7591 | 0,0001 | 0,0014 |
| ENSG00000184925 | LCN12     | lipocalin 12                                                                      | 1,3753  | 2,5942 | 0,0000 | 0,0000 |
| ENSG00000148346 | LCN2      | lipocalin 2                                                                       | -2,4442 | 0,1837 | 0,0000 | 0,0000 |
| ENSG00000136167 | LCP1      | lymphocyte cytosolic protein 1 (L-plastin)                                        | -0,6790 | 0,6246 | 0,0004 | 0,0043 |
| ENSG00000043462 | LCP2      | lymphocyte cytosolic protein 2 (SH2 domain containing leukocyte protein of 76kDa) | -1,1200 | 0,4601 | 0,0000 | 0,0006 |
| ENSG00000198728 | LDB1      | LIM domain binding 1                                                              | 0,3890  | 1,3094 | 0,0000 | 0,0001 |
| ENSG00000166816 | LDHD      | lactate dehydrogenase D                                                           | 0,9822  | 1,9754 | 0,0003 | 0,0037 |
| ENSG00000203985 | LDLRAD1   | low density lipoprotein receptor class A domain containing 1                      | 2,5875  | 6,0104 | 0,0000 | 0,0000 |
| ENSG00000186007 | LEMD1     | LEM domain containing 1                                                           | 0,9654  | 1,9526 | 0,0000 | 0,0000 |
| ENSG00000226696 | LENG8-AS1 | LENG8 antisense RNA 1                                                             | 0,6261  | 1,5433 | 0,0001 | 0,0009 |
| ENSG00000166477 | LEO1      | LEO1 homolog, Paf1/RNA polymerase II complex component                            | -0,5716 | 0,6729 | 0,0000 | 0,0000 |
| ENSG00000100097 | LGALS1    | lectin, galactoside-binding, soluble, 1                                           | 0,4904  | 1,4048 | 0,0000 | 0,0002 |
| ENSG00000131981 | LGALS3    | lectin, galactoside-binding, soluble, 3                                           | 0,5241  | 1,4380 | 0,0000 | 0,0000 |
| ENSG00000168961 | LGALS9    | lectin, galactoside-binding, soluble, 9                                           | 1,1129  | 2,1628 | 0,0000 | 0,0000 |
| ENSG00000139292 | LGR5      | leucine-rich repeat containing G protein-coupled receptor 5                       | 1,1100  | 2,1585 | 0,0000 | 0,0003 |
| ENSG00000183722 | LHFP      | lipoma HMGIC fusion partner                                                       | -0,6109 | 0,6548 | 0,0000 | 0,0000 |
| ENSG00000107902 | LHPP      | phospholysine phosphohistidine inorganic pyrophosphate phosphatase                | 0,4729  | 1,3879 | 0,0001 | 0,0019 |
| ENSG00000174405 | LIG4      | ligase IV, DNA, ATP-dependent                                                     | -1,3754 | 0,3854 | 0,0000 | 0,0000 |
| ENSG00000239998 | LILRA2    | leukocyte immunoglobulin-like receptor, subfamily A (with TM domain), member 2    | 2,2220  | 4,6655 | 0,0000 | 0,0000 |
| ENSG00000205659 | LIN52     | lin-52 DREAM MuvB core complex component                                          | 0,3871  | 1,3078 | 0,0000 | 0,0007 |
| ENSG00000104863 | LIN7B     | lin-7 homolog B (C. elegans)                                                      | 0,6208  | 1,5378 | 0,0009 | 0,0087 |
| ENSG00000175701 | LINC00116 | long intergenic non-protein coding RNA 116                                        | 0,4224  | 1,3401 | 0,0008 | 0,0077 |
| ENSG00000222041 | LINC00152 | long intergenic non-protein coding RNA 152                                        | -0,4709 | 0,7215 | 0,0000 | 0,0000 |
| ENSG00000196668 | LINC00173 | long intergenic non-protein coding RNA 173                                        | -0,8621 | 0,5501 | 0,0000 | 0,0000 |
| ENSG00000179406 | LINC00174 | long intergenic non-protein coding RNA 174                                        | 0,6664  | 1,5871 | 0,0000 | 0,0005 |
| ENSG00000175699 | LINC00521 | long intergenic non-protein coding RNA 521                                        | 1,6133  | 3,0595 | 0,0000 | 0,0000 |
| ENSG00000276476 | LINC00540 | long intergenic non-protein coding RNA 540                                        | 1,1043  | 2,1499 | 0,0001 | 0,0008 |
| ENSG00000258441 | LINC00641 | long intergenic non-protein coding RNA 641                                        | -0,4589 | 0,7276 | 0,0000 | 0,0007 |
| ENSG00000263753 | LINC00667 | long intergenic non-protein coding RNA 667                                        | -0,5470 | 0,6844 | 0,0000 | 0,0003 |
| ENSG00000267535 | LINC00868 | long intergenic non-protein coding RNA 868                                        | -0,7632 | 0,5892 | 0,0000 | 0,0000 |
| ENSG00000235703 | LINC00894 | long intergenic non-protein coding RNA 894                                        | 0,6572  | 1,5770 | 0,0004 | 0,0042 |

|                 |           |                                                        |         |        |        |        |
|-----------------|-----------|--------------------------------------------------------|---------|--------|--------|--------|
| ENSG00000231711 | LINC00899 | long intergenic non-protein coding RNA 899             | 0,5708  | 1,4854 | 0,0000 | 0,0002 |
| ENSG00000188825 | LINC00910 | long intergenic non-protein coding RNA 910             | 0,5797  | 1,4946 | 0,0005 | 0,0056 |
| ENSG00000235884 | LINC00941 | long intergenic non-protein coding RNA 941             | -0,4888 | 0,7126 | 0,0000 | 0,0004 |
| ENSG00000256128 | LINC00944 | long intergenic non-protein coding RNA 944             | -0,9775 | 0,5079 | 0,0004 | 0,0039 |
| ENSG00000281205 | LINC00950 | long intergenic non-protein coding RNA 950             | 1,7012  | 3,2517 | 0,0000 | 0,0000 |
| ENSG00000228784 | LINC00954 | long intergenic non-protein coding RNA 954             | 0,9011  | 1,8675 | 0,0002 | 0,0026 |
| ENSG00000235314 | LINC00957 | long intergenic non-protein coding RNA 957             | 0,8077  | 1,7505 | 0,0000 | 0,0000 |
| ENSG00000204054 | LINC00963 | long intergenic non-protein coding RNA 963             | 0,5079  | 1,4219 | 0,0000 | 0,0000 |
| ENSG00000240476 | LINC00973 | long intergenic non-protein coding RNA 973             | 0,7144  | 1,6408 | 0,0001 | 0,0011 |
| ENSG00000244041 | LINC01011 | long intergenic non-protein coding RNA 1011            | 0,7661  | 1,7007 | 0,0000 | 0,0004 |
| ENSG00000249378 | LINC01060 | long intergenic non-protein coding RNA 1060            | -0,7160 | 0,6088 | 0,0008 | 0,0077 |
| ENSG00000222033 | LINC01124 | long intergenic non-protein coding RNA 1124            | 0,7131  | 1,6393 | 0,0000 | 0,0000 |
| ENSG00000232987 | LINC01219 | long intergenic non-protein coding RNA 1219            | 1,6591  | 3,1582 | 0,0000 | 0,0000 |
| ENSG00000231742 | LINC01273 | long intergenic non-protein coding RNA 1273            | 0,7320  | 1,6609 | 0,0000 | 0,0001 |
| ENSG00000280587 | LINC01348 | long intergenic non-protein coding RNA 1348            | 0,7868  | 1,7252 | 0,0000 | 0,0006 |
| ENSG00000262468 | LINC01569 | long intergenic non-protein coding RNA 1569            | 0,6608  | 1,5810 | 0,0000 | 0,0007 |
| ENSG00000259518 | LINC01583 | long intergenic non-protein coding RNA 1583            | 1,3173  | 2,4921 | 0,0000 | 0,0000 |
| ENSG00000169783 | LINGO1    | leucine rich repeat and Ig domain containing 1         | 1,8391  | 3,5779 | 0,0000 | 0,0000 |
| ENSG00000174482 | LINGO2    | leucine rich repeat and Ig domain containing 2         | 0,9997  | 1,9995 | 0,0002 | 0,0019 |
| ENSG00000073350 | LLGL2     | lethal giant larvae homolog 2 (Drosophila)             | 0,5204  | 1,4343 | 0,0003 | 0,0034 |
| ENSG00000139233 | LLPH      | LLP homolog, long-term synaptic facilitation (Aplysia) | -0,4966 | 0,7088 | 0,0000 | 0,0000 |
| ENSG00000139636 | LMBR1L    | limb development membrane protein 1-like               | 0,4029  | 1,3222 | 0,0003 | 0,0034 |
| ENSG00000071282 | LMCD1     | LIM and cysteine-rich domains 1                        | 0,6279  | 1,5454 | 0,0000 | 0,0001 |
| ENSG00000135363 | LMO2      | LIM domain only 2 (rhombotin-like 1)                   | -0,4129 | 0,7511 | 0,0003 | 0,0032 |
| ENSG00000136153 | LMO7      | LIM domain 7                                           | -0,6155 | 0,6527 | 0,0000 | 0,0000 |
| ENSG00000163431 | LMOD1     | leiomodoin 1 (smooth muscle)                           | 1,1826  | 2,2698 | 0,0000 | 0,0002 |
| ENSG00000142235 | LMTK3     | lemur tyrosine kinase 3                                | 0,6799  | 1,6020 | 0,0000 | 0,0002 |
| ENSG00000196365 | LONP1     | lon peptidase 1, mitochondrial                         | 0,4293  | 1,3466 | 0,0001 | 0,0011 |
| ENSG00000113083 | LOX       | lysyl oxidase                                          | 1,6207  | 3,0752 | 0,0000 | 0,0000 |
| ENSG00000134013 | LOXL2     | lysyl oxidase-like 2                                   | 0,5349  | 1,4488 | 0,0000 | 0,0002 |
| ENSG00000213071 | LPAL2     | lipoprotein, Lp(a)-like 2, pseudogene                  | -0,7271 | 0,6041 | 0,0007 | 0,0068 |

|                 |           |                                                                     |         |        |        |        |
|-----------------|-----------|---------------------------------------------------------------------|---------|--------|--------|--------|
| ENSG00000198121 | LPAR1     | lysophosphatidic acid receptor 1                                    | 0,7740  | 1,7099 | 0,0000 | 0,0005 |
| ENSG00000087253 | LPCAT2    | lysophosphatidylcholine acyltransferase 2                           | -0,4923 | 0,7109 | 0,0000 | 0,0000 |
| ENSG00000132793 | LPIN3     | lipin 3                                                             | 0,4905  | 1,4050 | 0,0000 | 0,0004 |
| ENSG00000175445 | LPL       | lipoprotein lipase                                                  | -1,3799 | 0,3843 | 0,0000 | 0,0000 |
| ENSG00000136141 | LRCH1     | leucine-rich repeats and calponin homology (CH) domain containing 1 | -0,7111 | 0,6109 | 0,0000 | 0,0000 |
| ENSG00000144749 | LRIG1     | leucine-rich repeats and immunoglobulin-like domains 1              | -0,4082 | 0,7536 | 0,0000 | 0,0000 |
| ENSG00000123384 | LRP1      | low density lipoprotein receptor-related protein 1                  | 0,8748  | 1,8337 | 0,0001 | 0,0012 |
| ENSG00000081479 | LRP2      | low density lipoprotein receptor-related protein 2                  | 1,1130  | 2,1630 | 0,0000 | 0,0000 |
| ENSG00000247675 | LRP4-AS1  | LRP4 antisense RNA 1                                                | 0,8274  | 1,7745 | 0,0003 | 0,0036 |
| ENSG00000165501 | LRR1      | leucine rich repeat protein 1                                       | -0,4400 | 0,7371 | 0,0000 | 0,0001 |
| ENSG00000204950 | LRRC10B   | leucine rich repeat containing 10B                                  | 0,9750  | 1,9657 | 0,0000 | 0,0000 |
| ENSG00000010626 | LRRC23    | leucine rich repeat containing 23                                   | 0,5211  | 1,4350 | 0,0000 | 0,0000 |
| ENSG00000268324 | LRRC2-AS1 | LRRC2 antisense RNA 1                                               | 0,8889  | 1,8517 | 0,0010 | 0,0096 |
| ENSG00000137507 | LRRC32    | leucine rich repeat containing 32                                   | 2,2318  | 4,6972 | 0,0000 | 0,0000 |
| ENSG00000171757 | LRRC34    | leucine rich repeat containing 34                                   | -0,5718 | 0,6728 | 0,0000 | 0,0000 |
| ENSG00000108829 | LRRC59    | leucine rich repeat containing 59                                   | -0,5823 | 0,6679 | 0,0000 | 0,0000 |
| ENSG00000178026 | LRRC75B   | leucine rich repeat containing 75B                                  | 0,9352  | 1,9122 | 0,0000 | 0,0000 |
| ENSG00000197147 | LRRC8B    | leucine rich repeat containing 8 family, member B                   | -0,5210 | 0,6969 | 0,0000 | 0,0000 |
| ENSG00000171488 | LRRC8C    | leucine rich repeat containing 8 family, member C                   | -1,5061 | 0,3521 | 0,0000 | 0,0000 |
| ENSG00000124831 | LRRFIP1   | leucine rich repeat (in FLII) interacting protein 1                 | -0,5687 | 0,6742 | 0,0000 | 0,0000 |
| ENSG00000148356 | LRSAM1    | leucine rich repeat and sterile alpha motif containing 1            | 0,6958  | 1,6198 | 0,0000 | 0,0000 |
| ENSG00000041802 | LSG1      | large 60S subunit nuclear export GTPase 1                           | -0,4269 | 0,7439 | 0,0000 | 0,0002 |
| ENSG00000106355 | LSM5      | LSM5 homolog, U6 small nuclear RNA and mRNA degradation associated  | -0,5290 | 0,6930 | 0,0000 | 0,0000 |
| ENSG00000181016 | LSMEM1    | leucine-rich single-pass membrane protein 1                         | -0,6714 | 0,6279 | 0,0001 | 0,0015 |
| ENSG00000227507 | LTB       | lymphotoxin beta (TNF superfamily, member 3)                        | -0,9869 | 0,5046 | 0,0001 | 0,0008 |
| ENSG00000049323 | LTBP1     | latent transforming growth factor beta binding protein 1            | -0,5981 | 0,6606 | 0,0000 | 0,0000 |
| ENSG00000119681 | LTBP2     | latent transforming growth factor beta binding protein 2            | -0,8883 | 0,5403 | 0,0000 | 0,0000 |
| ENSG00000012223 | LTF       | lactotransferrin                                                    | 0,9523  | 1,9350 | 0,0005 | 0,0051 |
| ENSG00000135521 | LTV1      | LTV1 ribosome biogenesis factor                                     | -0,5732 | 0,6721 | 0,0000 | 0,0000 |
| ENSG00000248323 | LUCAT1    | lung cancer associated transcript 1 (non-protein coding)            | 0,4061  | 1,3251 | 0,0005 | 0,0056 |
| ENSG00000169641 | LUZP1     | leucine zipper protein 1                                            | -0,5074 | 0,7035 | 0,0000 | 0,0000 |

|                 |          |                                                                        |         |        |        |        |
|-----------------|----------|------------------------------------------------------------------------|---------|--------|--------|--------|
| ENSG00000204421 | LY6G6C   | lymphocyte antigen 6 complex, locus G6C                                | 0,9833  | 1,9769 | 0,0001 | 0,0014 |
| ENSG00000145220 | LYAR     | Ly1 antibody reactive                                                  | -0,6826 | 0,6230 | 0,0000 | 0,0000 |
| ENSG00000159871 | LYPD5    | LY6/PLAUR domain containing 5                                          | 0,6097  | 1,5259 | 0,0002 | 0,0027 |
| ENSG00000150556 | LYPD6B   | LY6/PLAUR domain containing 6B                                         | 1,3396  | 2,5307 | 0,0000 | 0,0000 |
| ENSG00000102897 | LYRM1    | LYR motif containing 1                                                 | -0,4194 | 0,7477 | 0,0001 | 0,0015 |
| ENSG00000232859 | LYRM9    | LYR motif containing 9                                                 | 0,8432  | 1,7940 | 0,0000 | 0,0000 |
| ENSG00000140280 | LYSMD2   | LysM, putative peptidoglycan-binding, domain containing 2              | -0,6445 | 0,6397 | 0,0000 | 0,0000 |
| ENSG00000099949 | LZTR1    | leucine-zipper-like transcription regulator 1                          | 0,5044  | 1,4185 | 0,0000 | 0,0001 |
| ENSG00000107816 | LZTS2    | leucine zipper, putative tumor suppressor 2                            | 0,4318  | 1,3489 | 0,0002 | 0,0022 |
| ENSG00000183742 | MACC1    | metastasis associated in colon cancer 1                                | 2,4979  | 5,6487 | 0,0000 | 0,0000 |
| ENSG00000133315 | MACROD1  | MACRO domain containing 1                                              | 0,4802  | 1,3949 | 0,0000 | 0,0003 |
| ENSG00000178573 | MAF      | v-maf avian musculoaponeurotic fibrosarcoma oncogene homolog           | 0,8344  | 1,7831 | 0,0005 | 0,0048 |
| ENSG00000204103 | MAFB     | v-maf avian musculoaponeurotic fibrosarcoma oncogene homolog B         | 0,5983  | 1,5139 | 0,0000 | 0,0000 |
| ENSG00000046774 | MAGEC2   | melanoma antigen family C2                                             | 0,4904  | 1,4049 | 0,0000 | 0,0000 |
| ENSG00000198042 | MAK16    | MAK16 homolog                                                          | -0,5996 | 0,6599 | 0,0000 | 0,0000 |
| ENSG00000172175 | MALT1    | MALT1 paracaspase                                                      | -0,5727 | 0,6724 | 0,0000 | 0,0000 |
| ENSG00000177239 | MAN1B1   | mannosidase, alpha, class 1B, member 1                                 | 0,3979  | 1,3176 | 0,0000 | 0,0007 |
| ENSG00000140400 | MAN2C1   | mannosidase, alpha, class 2C, member 1                                 | 0,5614  | 1,4757 | 0,0000 | 0,0000 |
| ENSG00000109323 | MANBA    | mannosidase, beta A, lysosomal                                         | 0,4951  | 1,4094 | 0,0000 | 0,0000 |
| ENSG00000189221 | MAOA     | monoamine oxidase A                                                    | 0,5503  | 1,4644 | 0,0001 | 0,0013 |
| ENSG00000166963 | MAP1A    | microtubule-associated protein 1A                                      | 0,7829  | 1,7206 | 0,0009 | 0,0089 |
| ENSG00000131711 | MAP1B    | microtubule-associated protein 1B                                      | 0,5085  | 1,4226 | 0,0000 | 0,0000 |
| ENSG00000130758 | MAP3K10  | mitogen-activated protein kinase kinase kinase 10                      | 0,5253  | 1,4392 | 0,0010 | 0,0091 |
| ENSG00000168067 | MAP4K2   | mitogen-activated protein kinase kinase kinase kinase 2                | 0,5975  | 1,5131 | 0,0000 | 0,0001 |
| ENSG00000180834 | MAP6D1   | MAP6 domain containing 1                                               | -0,4191 | 0,7479 | 0,0004 | 0,0045 |
| ENSG00000181085 | MAPK15   | mitogen-activated protein kinase 15                                    | 0,9136  | 1,8837 | 0,0008 | 0,0079 |
| ENSG00000102882 | MAPK3    | mitogen-activated protein kinase 3                                     | 0,4007  | 1,3202 | 0,0002 | 0,0019 |
| ENSG00000121653 | MAPK8IP1 | mitogen-activated protein kinase 8 interacting protein 1               | 1,0478  | 2,0673 | 0,0000 | 0,0000 |
| ENSG00000084764 | MAPRE3   | microtubule-associated protein, RP/EB family, member 3                 | 0,7547  | 1,6873 | 0,0000 | 0,0000 |
| ENSG00000186868 | MAPT     | microtubule-associated protein tau                                     | 1,0253  | 2,0354 | 0,0000 | 0,0000 |
| ENSG00000144583 | MARCH4   | membrane-associated ring finger (C3HC4) 4, E3 ubiquitin protein ligase | -1,0267 | 0,4908 | 0,0000 | 0,0000 |

|                 |         |                                                                        |         |        |        |        |
|-----------------|---------|------------------------------------------------------------------------|---------|--------|--------|--------|
| ENSG00000165406 | MARCH8  | membrane-associated ring finger (C3HC4) 8, E3 ubiquitin protein ligase | 0,5123  | 1,4263 | 0,0000 | 0,0000 |
| ENSG00000166986 | MARS    | methionyl-tRNA synthetase                                              | 0,5071  | 1,4212 | 0,0000 | 0,0000 |
| ENSG00000247626 | MARS2   | methionyl-tRNA synthetase 2, mitochondrial                             | -0,6793 | 0,6245 | 0,0000 | 0,0000 |
| ENSG00000105613 | MAST1   | microtubule associated serine/threonine kinase 1                       | 0,6761  | 1,5978 | 0,0005 | 0,0051 |
| ENSG00000151224 | MAT1A   | methionine adenosyltransferase I, alpha                                | 1,7079  | 3,2670 | 0,0000 | 0,0000 |
| ENSG00000168906 | MAT2A   | methionine adenosyltransferase II, alpha                               | -0,6718 | 0,6277 | 0,0000 | 0,0000 |
| ENSG00000280987 | MATR3   | matrin 3                                                               | -0,6925 | 0,6188 | 0,0000 | 0,0001 |
| ENSG00000166987 | MBD6    | methyl-CpG binding domain protein 6                                    | 0,4413  | 1,3578 | 0,0000 | 0,0001 |
| ENSG00000151332 | MBIP    | MAP3K12 binding inhibitory protein 1                                   | -0,4389 | 0,7377 | 0,0000 | 0,0003 |
| ENSG00000171444 | MCC     | mutated in colorectal cancers                                          | -0,3900 | 0,7632 | 0,0000 | 0,0001 |
| ENSG00000180398 | MCFD2   | multiple coagulation factor deficiency 2                               | -0,5454 | 0,6852 | 0,0000 | 0,0000 |
| ENSG00000175471 | MCTP1   | multiple C2 domains, transmembrane 1                                   | 0,6895  | 1,6127 | 0,0000 | 0,0000 |
| ENSG00000140563 | MCTP2   | multiple C2 domains, transmembrane 2                                   | -0,5571 | 0,6797 | 0,0001 | 0,0017 |
| ENSG00000232119 | MCTS1   | malignant T cell amplified sequence 1                                  | -0,4180 | 0,7485 | 0,0003 | 0,0031 |
| ENSG00000144893 | MED12L  | mediator complex subunit 12-like                                       | -0,7277 | 0,6039 | 0,0000 | 0,0000 |
| ENSG00000123066 | MED13L  | mediator complex subunit 13-like                                       | -0,3905 | 0,7629 | 0,0000 | 0,0000 |
| ENSG00000175221 | MED16   | mediator complex subunit 16                                            | 0,5303  | 1,4442 | 0,0003 | 0,0033 |
| ENSG00000112282 | MED23   | mediator complex subunit 23                                            | 0,4152  | 1,3335 | 0,0000 | 0,0000 |
| ENSG00000104973 | MED25   | mediator complex subunit 25                                            | 0,4206  | 1,3385 | 0,0005 | 0,0056 |
| ENSG00000136146 | MED4    | mediator complex subunit 4                                             | -0,4462 | 0,7340 | 0,0000 | 0,0001 |
| ENSG00000145794 | MEGF10  | multiple EGF-like-domains 10                                           | -1,5085 | 0,3515 | 0,0000 | 0,0000 |
| ENSG00000157890 | MEGF11  | multiple EGF-like-domains 11                                           | 1,1302  | 2,1889 | 0,0000 | 0,0000 |
| ENSG00000162591 | MEGF6   | multiple EGF-like-domains 6                                            | 0,8465  | 1,7981 | 0,0003 | 0,0036 |
| ENSG00000111142 | METAP2  | methionyl aminopeptidase 2                                             | -0,4661 | 0,7239 | 0,0000 | 0,0001 |
| ENSG00000037897 | METTL1  | methyltransferase like 1                                               | -0,5990 | 0,6602 | 0,0000 | 0,0000 |
| ENSG00000010165 | METTL13 | methyltransferase like 13                                              | -0,4397 | 0,7373 | 0,0000 | 0,0000 |
| ENSG00000139160 | METTL20 | methyltransferase like 20                                              | 0,8470  | 1,7987 | 0,0003 | 0,0031 |
| ENSG00000165819 | METTL3  | methyltransferase like 3                                               | -0,4044 | 0,7556 | 0,0000 | 0,0001 |
| ENSG00000185432 | METTL7A | methyltransferase like 7A                                              | 0,9397  | 1,9181 | 0,0000 | 0,0003 |
| ENSG00000123600 | METTL8  | methyltransferase like 8                                               | -0,3795 | 0,7687 | 0,0001 | 0,0015 |
| ENSG00000197006 | METTL9  | methyltransferase like 9                                               | -0,4160 | 0,7495 | 0,0000 | 0,0006 |

|                 |             |                                                                                   |         |        |        |        |
|-----------------|-------------|-----------------------------------------------------------------------------------|---------|--------|--------|--------|
| ENSG00000254726 | MEX3A       | mex-3 RNA binding family member A                                                 | -0,4737 | 0,7201 | 0,0000 | 0,0000 |
| ENSG00000117122 | MFAP2       | microfibrillar-associated protein 2                                               | 0,7675  | 1,7023 | 0,0000 | 0,0000 |
| ENSG00000198948 | MFAP3L      | microfibrillar-associated protein 3-like                                          | -0,9080 | 0,5329 | 0,0000 | 0,0000 |
| ENSG00000140545 | MFGE8       | milk fat globule-EGF factor 8 protein                                             | 0,4232  | 1,3409 | 0,0004 | 0,0041 |
| ENSG00000168389 | MFSD2A      | major facilitator superfamily domain containing 2A                                | -0,7125 | 0,6102 | 0,0000 | 0,0000 |
| ENSG00000128268 | MGAT3       | mannosyl (beta-1,4-)-glycoprotein beta-1,4-N-acetylglucosaminyltransferase        | 0,9438  | 1,9236 | 0,0000 | 0,0000 |
| ENSG00000167889 | MGAT5B      | mannosyl (alpha-1,6-)-glycoprotein beta-1,6-N-acetyl-glucosaminyltransferase, iso | -0,5431 | 0,6863 | 0,0010 | 0,0093 |
| ENSG00000170430 | MGMT        | O-6-methylguanine-DNA methyltransferase                                           | 0,6526  | 1,5720 | 0,0000 | 0,0004 |
| ENSG00000154305 | MIA3        | melanoma inhibitory activity family, member 3                                     | 0,3793  | 1,3007 | 0,0000 | 0,0001 |
| ENSG00000225783 | MIAT        | myocardial infarction associated transcript (non-protein coding)                  | 1,1191  | 2,1721 | 0,0000 | 0,0000 |
| ENSG00000165487 | MICU2       | mitochondrial calcium uptake 2                                                    | -0,6377 | 0,6427 | 0,0000 | 0,0000 |
| ENSG00000177427 | MIEF2       | mitochondrial elongation factor 2                                                 | 0,3996  | 1,3191 | 0,0003 | 0,0030 |
| ENSG00000125457 | MIF4GD      | MIF4G domain containing                                                           | 0,4916  | 1,4060 | 0,0000 | 0,0000 |
| ENSG00000170854 | MINA        | MYC induced nuclear antigen                                                       | -0,4486 | 0,7327 | 0,0001 | 0,0009 |
| ENSG00000173436 | MINOS1      | mitochondrial inner membrane organizing system 1                                  | -0,6551 | 0,6350 | 0,0000 | 0,0000 |
| ENSG00000027001 | MIPEP       | mitochondrial intermediate peptidase                                              | -0,4202 | 0,7473 | 0,0001 | 0,0018 |
| ENSG00000215417 | MIR17HG     | miR-17-92 cluster host gene                                                       | -1,2412 | 0,4230 | 0,0000 | 0,0000 |
| ENSG00000247095 | MIR210HG    | MIR210 host gene                                                                  | 1,0848  | 2,1210 | 0,0000 | 0,0000 |
| ENSG00000270069 | MIR22HG     | MIR222 host gene                                                                  | -0,7921 | 0,5775 | 0,0000 | 0,0000 |
| ENSG00000186594 | MIR22HG     | MIR22 host gene                                                                   | -0,5278 | 0,6936 | 0,0000 | 0,0000 |
| ENSG00000253522 | MIR3142HG   | MIR3142 host gene                                                                 | -0,8441 | 0,5571 | 0,0000 | 0,0000 |
| ENSG00000172965 | MIR4435-2HG | MIR4435-2 host gene                                                               | -0,4891 | 0,7125 | 0,0000 | 0,0000 |
| ENSG00000223749 | MIR503HG    | MIR503 host gene                                                                  | 0,4410  | 1,3576 | 0,0001 | 0,0012 |
| ENSG00000148773 | MKI67       | marker of proliferation Ki-67                                                     | -0,5533 | 0,6814 | 0,0000 | 0,0000 |
| ENSG00000099875 | MKNK2       | MAP kinase interacting serine/threonine kinase 2                                  | 0,4374  | 1,3542 | 0,0001 | 0,0016 |
| ENSG00000179455 | MKRN3       | makorin ring finger protein 3                                                     | -0,9323 | 0,5240 | 0,0000 | 0,0000 |
| ENSG00000011143 | MKS1        | Meckel syndrome, type 1                                                           | 0,4573  | 1,3730 | 0,0000 | 0,0003 |
| ENSG00000150051 | MKX         | mohawk homeobox                                                                   | 0,6819  | 1,6042 | 0,0004 | 0,0043 |
| ENSG00000110917 | MLEC        | malectin                                                                          | -0,3989 | 0,7584 | 0,0000 | 0,0000 |
| ENSG00000178053 | MLF1        | myeloid leukemia factor 1                                                         | 0,4599  | 1,3755 | 0,0000 | 0,0004 |
| ENSG00000168404 | MLKL        | mixed lineage kinase domain-like                                                  | -0,5908 | 0,6640 | 0,0000 | 0,0000 |

|                 |           |                                                                  |         |        |        |        |
|-----------------|-----------|------------------------------------------------------------------|---------|--------|--------|--------|
| ENSG00000171843 | MLLT3     | myeloid/lymphoid or mixed-lineage leukemia; translocated to, 3   | 0,4389  | 1,3556 | 0,0002 | 0,0025 |
| ENSG00000115648 | MLPH      | melanophilin                                                     | -0,4749 | 0,7195 | 0,0000 | 0,0000 |
| ENSG00000167965 | MLST8     | MTOR associated protein, LST8 homolog                            | 0,5433  | 1,4573 | 0,0000 | 0,0005 |
| ENSG00000009950 | MLXIPL    | MLX interacting protein-like                                     | 0,7676  | 1,7024 | 0,0000 | 0,0000 |
| ENSG00000099953 | MMP11     | matrix metalloproteinase 11                                      | 1,1746  | 2,2573 | 0,0000 | 0,0000 |
| ENSG00000102996 | MMP15     | matrix metalloproteinase 15 (membrane-inserted)                  | 0,5047  | 1,4188 | 0,0002 | 0,0026 |
| ENSG00000125966 | MMP24     | matrix metalloproteinase 24 (membrane-inserted)                  | 0,5156  | 1,4296 | 0,0005 | 0,0053 |
| ENSG00000126005 | MMP24-AS1 | MMP24 antisense RNA 1                                            | 0,8548  | 1,8085 | 0,0000 | 0,0000 |
| ENSG00000100985 | MMP9      | matrix metalloproteinase 9                                       | -1,7019 | 0,3074 | 0,0000 | 0,0000 |
| ENSG00000173269 | MMRN2     | multimerin 2                                                     | 0,8309  | 1,7787 | 0,0000 | 0,0000 |
| ENSG00000106384 | MOGAT3    | monoacylglycerol O-acyltransferase 3                             | 1,0698  | 2,0992 | 0,0000 | 0,0000 |
| ENSG00000164077 | MON1A     | MON1 secretory trafficking family member A                       | -0,3906 | 0,7628 | 0,0006 | 0,0063 |
| ENSG00000171160 | MORN4     | MORN repeat containing 4                                         | 0,7250  | 1,6529 | 0,0000 | 0,0000 |
| ENSG00000101928 | MOSPD1    | motile sperm domain containing 1                                 | -0,3871 | 0,7647 | 0,0001 | 0,0010 |
| ENSG00000103152 | MPG       | N-methylpurine DNA glycosylase                                   | 0,4886  | 1,4031 | 0,0007 | 0,0068 |
| ENSG00000124383 | MPHOSPH10 | M-phase phosphoprotein 10 (U3 small nucleolar ribonucleoprotein) | -0,4848 | 0,7146 | 0,0000 | 0,0001 |
| ENSG00000135698 | MPHOSPH6  | M-phase phosphoprotein 6                                         | -0,4868 | 0,7136 | 0,0000 | 0,0003 |
| ENSG00000196199 | MPHOSPH8  | M-phase phosphoprotein 8                                         | -0,5361 | 0,6896 | 0,0000 | 0,0000 |
| ENSG00000178802 | MPI       | mannose phosphate isomerase                                      | 0,5177  | 1,4317 | 0,0000 | 0,0000 |
| ENSG00000108852 | MPP2      | membrane protein, palmitoylated 2 (MAGUK p55 subfamily member 2) | 0,5665  | 1,4809 | 0,0000 | 0,0001 |
| ENSG00000072415 | MPP5      | membrane protein, palmitoylated 5 (MAGUK p55 subfamily member 5) | -0,5452 | 0,6853 | 0,0000 | 0,0000 |
| ENSG00000105926 | MPP6      | membrane protein, palmitoylated 6 (MAGUK p55 subfamily member 6) | -0,6262 | 0,6479 | 0,0000 | 0,0000 |
| ENSG00000154889 | MPPE1     | metallophosphoesterase 1                                         | 0,4103  | 1,3290 | 0,0002 | 0,0025 |
| ENSG00000160588 | MPZL3     | myelin protein zero-like 3                                       | 0,5610  | 1,4752 | 0,0000 | 0,0000 |
| ENSG00000153029 | MR1       | major histocompatibility complex, class I-related                | 0,5641  | 1,4785 | 0,0000 | 0,0000 |
| ENSG00000118242 | MREG      | melanoregulin                                                    | -0,5490 | 0,6835 | 0,0000 | 0,0000 |
| ENSG00000179832 | MROH1     | maestro heat-like repeat family member 1                         | 0,5949  | 1,5104 | 0,0000 | 0,0002 |
| ENSG00000184313 | MROH7     | maestro heat-like repeat family member 7                         | 0,8990  | 1,8647 | 0,0010 | 0,0091 |
| ENSG00000169288 | MRPL1     | mitochondrial ribosomal protein L1                               | -0,4173 | 0,7488 | 0,0004 | 0,0046 |
| ENSG00000114686 | MRPL3     | mitochondrial ribosomal protein L3                               | -0,4156 | 0,7497 | 0,0001 | 0,0012 |
| ENSG00000106591 | MRPL32    | mitochondrial ribosomal protein L32                              | -0,4869 | 0,7135 | 0,0000 | 0,0001 |



|                 |          |                                                                   |         |        |        |        |
|-----------------|----------|-------------------------------------------------------------------|---------|--------|--------|--------|
| ENSG00000132313 | MRPL35   | mitochondrial ribosomal protein L35                               | -0,3925 | 0,7618 | 0,0002 | 0,0027 |
| ENSG00000102738 | MRPS31   | mitochondrial ribosomal protein S31                               | -0,5440 | 0,6858 | 0,0000 | 0,0000 |
| ENSG00000135972 | MRPS9    | mitochondrial ribosomal protein S9                                | -0,4230 | 0,7459 | 0,0000 | 0,0003 |
| ENSG00000053372 | MRTO4    | MRT4 homolog, ribosome maturation factor                          | -0,6979 | 0,6165 | 0,0000 | 0,0000 |
| ENSG00000120458 | MSANTD2  | Myb/SANT-like DNA-binding domain containing 2                     | -0,6832 | 0,6228 | 0,0000 | 0,0000 |
| ENSG00000204410 | MSH5     | mutS homolog 5                                                    | 0,5424  | 1,4564 | 0,0007 | 0,0071 |
| ENSG00000174099 | MSRB3    | methionine sulfoxide reductase B3                                 | -0,4149 | 0,7501 | 0,0000 | 0,0001 |
| ENSG00000173531 | MST1     | macrophage stimulating 1                                          | 1,1666  | 2,2448 | 0,0000 | 0,0000 |
| ENSG00000163132 | MSX1     | msh homeobox 1                                                    | -0,8682 | 0,5478 | 0,0000 | 0,0000 |
| ENSG00000205362 | MT1A     | metallothionein 1A                                                | 0,9716  | 1,9610 | 0,0000 | 0,0000 |
| ENSG00000187193 | MT1X     | metallothionein 1X                                                | 0,8607  | 1,8159 | 0,0000 | 0,0000 |
| ENSG00000087250 | MT3      | metallothionein 3                                                 | 1,1910  | 2,2830 | 0,0000 | 0,0000 |
| ENSG00000237973 | MTCO1P12 | MT-CO1 pseudogene 12                                              | -0,3790 | 0,7689 | 0,0007 | 0,0073 |
| ENSG00000147649 | MTDH     | metadherin                                                        | -0,4058 | 0,7548 | 0,0000 | 0,0001 |
| ENSG00000127989 | MTERF1   | mitochondrial transcription termination factor 1                  | -0,4793 | 0,7173 | 0,0000 | 0,0006 |
| ENSG00000163738 | MTHFD2L  | methylenetetrahydrofolate dehydrogenase (NADP+ dependent) 2-like  | -0,5713 | 0,6730 | 0,0000 | 0,0000 |
| ENSG00000132749 | MTL5     | metallothionein-like 5, testis-specific (tesmin)                  | 0,4950  | 1,4093 | 0,0000 | 0,0002 |
| ENSG00000014914 | MTMR11   | myotubularin related protein 11                                   | 0,4797  | 1,3945 | 0,0002 | 0,0024 |
| ENSG00000100330 | MTMR3    | myotubularin related protein 3                                    | 0,3821  | 1,3033 | 0,0000 | 0,0001 |
| ENSG00000139505 | MTMR6    | myotubularin related protein 6                                    | -0,7404 | 0,5986 | 0,0000 | 0,0000 |
| ENSG00000220785 | MTMR9LP  | myotubularin related protein 9-like, pseudogene                   | 0,8233  | 1,7695 | 0,0001 | 0,0011 |
| ENSG00000198888 | MT-ND1   | mitochondrially encoded NADH dehydrogenase 1                      | -0,4631 | 0,7254 | 0,0000 | 0,0000 |
| ENSG00000210082 | MT-RNR2  | mitochondrially encoded 16S RNA                                   | 0,6561  | 1,5759 | 0,0000 | 0,0000 |
| ENSG00000124275 | MTRR     | 5-methyltetrahydrofolate-homocysteine methyltransferase reductase | -0,5470 | 0,6844 | 0,0000 | 0,0000 |
| ENSG00000170873 | MTSS1    | metastasis suppressor 1                                           | -0,4226 | 0,7461 | 0,0000 | 0,0000 |
| ENSG00000132613 | MTSS1L   | metastasis suppressor 1-like                                      | 0,7013  | 1,6260 | 0,0000 | 0,0000 |
| ENSG00000210194 | MT-TE    | mitochondrially encoded tRNA glutamic acid                        | -0,7239 | 0,6055 | 0,0000 | 0,0006 |
| ENSG00000129422 | MTUS1    | microtubule associated tumor suppressor 1                         | 0,5609  | 1,4752 | 0,0000 | 0,0000 |
| ENSG00000185499 | MUC1     | mucin 1, cell surface associated                                  | 0,5682  | 1,4826 | 0,0008 | 0,0079 |
| ENSG00000181143 | MUC16    | mucin 16, cell surface associated                                 | 1,4143  | 2,6653 | 0,0000 | 0,0000 |
| ENSG00000204544 | MUC21    | mucin 21, cell surface associated                                 | 0,9458  | 1,9263 | 0,0006 | 0,0059 |

|                 |         |                                                         |         |        |        |        |
|-----------------|---------|---------------------------------------------------------|---------|--------|--------|--------|
| ENSG00000132781 | MUTYH   | mutY DNA glycosylase                                    | 0,4612  | 1,3767 | 0,0003 | 0,0029 |
| ENSG00000013364 | MVP     | major vault protein                                     | 1,2045  | 2,3045 | 0,0000 | 0,0000 |
| ENSG00000059728 | MXD1    | MAX dimerization protein 1                              | 0,7205  | 1,6477 | 0,0000 | 0,0000 |
| ENSG00000213347 | MXD3    | MAX dimerization protein 3                              | 0,8272  | 1,7743 | 0,0000 | 0,0000 |
| ENSG00000123933 | MXD4    | MAX dimerization protein 4                              | 1,1963  | 2,2915 | 0,0000 | 0,0000 |
| ENSG00000119950 | MXI1    | MAX interactor 1, dimerization protein                  | 0,8633  | 1,8192 | 0,0000 | 0,0000 |
| ENSG00000179820 | MYADM   | myeloid-associated differentiation marker               | 0,4444  | 1,3607 | 0,0000 | 0,0000 |
| ENSG00000086967 | MYBPC2  | myosin binding protein C, fast type                     | 1,1251  | 2,1811 | 0,0000 | 0,0000 |
| ENSG00000214114 | MYCBP   | MYC binding protein                                     | -0,5054 | 0,7044 | 0,0000 | 0,0001 |
| ENSG00000005810 | MYCBP2  | MYC binding protein 2, E3 ubiquitin protein ligase      | -0,8720 | 0,5464 | 0,0000 | 0,0000 |
| ENSG00000172927 | MYEOV   | myeloma overexpressed                                   | -0,4289 | 0,7428 | 0,0000 | 0,0000 |
| ENSG00000144821 | MYH15   | myosin, heavy chain 15                                  | -2,0542 | 0,2408 | 0,0000 | 0,0000 |
| ENSG00000078814 | MYH7B   | myosin, heavy chain 7B, cardiac muscle, beta            | 1,3042  | 2,4694 | 0,0000 | 0,0000 |
| ENSG00000272975 | MYHAS   | myosin heavy chain gene cluster antisense RNA           | 0,9810  | 1,9739 | 0,0002 | 0,0027 |
| ENSG00000101608 | MYL12A  | myosin, light chain 12A, regulatory, non-sarcomeric     | -0,4518 | 0,7311 | 0,0000 | 0,0000 |
| ENSG00000118680 | MYL12B  | myosin, light chain 12B, regulatory                     | -0,4358 | 0,7393 | 0,0000 | 0,0001 |
| ENSG00000215375 | MYL5    | myosin, light chain 5, regulatory                       | 0,6596  | 1,5796 | 0,0000 | 0,0004 |
| ENSG00000101335 | MYL9    | myosin, light chain 9, regulatory                       | 0,6245  | 1,5417 | 0,0000 | 0,0000 |
| ENSG00000065534 | MYLK    | myosin light chain kinase                               | 1,0508  | 2,0716 | 0,0000 | 0,0000 |
| ENSG00000091536 | MYO15A  | myosin XVA                                              | 0,9991  | 1,9987 | 0,0000 | 0,0003 |
| ENSG00000266714 | MYO15B  | myosin XVB                                              | 0,6083  | 1,5244 | 0,0000 | 0,0005 |
| ENSG00000196535 | MYO18A  | myosin XVIIIIA                                          | 0,7761  | 1,7125 | 0,0000 | 0,0000 |
| ENSG00000124920 | MYRF    | myelin regulatory factor                                | 0,6735  | 1,5950 | 0,0000 | 0,0000 |
| ENSG00000196132 | MYT1    | myelin transcription factor 1                           | 2,0029  | 4,0080 | 0,0000 | 0,0000 |
| ENSG00000204899 | MZT1    | mitotic spindle organizing protein 1                    | -0,9575 | 0,5150 | 0,0000 | 0,0000 |
| ENSG00000139597 | N4BP2L1 | NEDD4 binding protein 2-like 1                          | 0,5845  | 1,4995 | 0,0006 | 0,0060 |
| ENSG00000145911 | N4BP3   | NEDD4 binding protein 3                                 | 0,7209  | 1,6482 | 0,0000 | 0,0005 |
| ENSG00000150456 | N6AMT2  | N-6 adenine-specific DNA methyltransferase 2 (putative) | -0,8565 | 0,5523 | 0,0000 | 0,0000 |
| ENSG00000164134 | NAA15   | N(alpha)-acetyltransferase 15, NatA auxiliary subunit   | -0,4979 | 0,7081 | 0,0000 | 0,0000 |
| ENSG00000172766 | NAA16   | N(alpha)-acetyltransferase 16, NatA auxiliary subunit   | -0,4147 | 0,7502 | 0,0002 | 0,0021 |
| ENSG00000139977 | NAA30   | N(alpha)-acetyltransferase 30, NatC catalytic subunit   | -0,4755 | 0,7192 | 0,0000 | 0,0000 |

|                 |          |                                                                   |         |        |        |        |
|-----------------|----------|-------------------------------------------------------------------|---------|--------|--------|--------|
| ENSG00000121579 | NAA50    | N(alpha)-acetyltransferase 50, NatE catalytic subunit             | -0,4053 | 0,7551 | 0,0000 | 0,0005 |
| ENSG00000237886 | NALT1    | NOTCH1 associated lncRNA in T cell acute lymphoblastic leukemia 1 | 0,9374  | 1,9151 | 0,0000 | 0,0006 |
| ENSG00000105835 | NAMPT    | nicotinamide phosphoribosyltransferase                            | -0,6989 | 0,6160 | 0,0000 | 0,0000 |
| ENSG00000229644 | NAMPTP1  | nicotinamide phosphoribosyltransferase pseudogene 1               | -0,6928 | 0,6187 | 0,0000 | 0,0000 |
| ENSG00000188613 | NANOS1   | nanos homolog 1 (Drosophila)                                      | -0,8164 | 0,5679 | 0,0000 | 0,0000 |
| ENSG00000268061 | NAPA-AS1 | NAPA antisense RNA 1                                              | 0,9276  | 1,9021 | 0,0000 | 0,0001 |
| ENSG00000161048 | NAPEPLD  | N-acyl phosphatidylethanolamine phospholipase D                   | -0,4838 | 0,7151 | 0,0000 | 0,0000 |
| ENSG00000134265 | NAPG     | N-ethylmaleimide-sensitive factor attachment protein, gamma       | -0,3976 | 0,7591 | 0,0000 | 0,0000 |
| ENSG00000103245 | NARFL    | nuclear prelamin A recognition factor-like                        | 0,4694  | 1,3845 | 0,0002 | 0,0020 |
| ENSG00000167011 | NAT16    | N-acetyltransferase 16 (GCN5-related, putative)                   | 0,6070  | 1,5231 | 0,0000 | 0,0000 |
| ENSG00000243477 | NAT6     | N-acetyltransferase 6 (GCN5-related)                              | 0,4762  | 1,3911 | 0,0000 | 0,0003 |
| ENSG00000274180 | NATD1    | N-acetyltransferase domain containing 1                           | 0,4462  | 1,3625 | 0,0000 | 0,0004 |
| ENSG00000172915 | NBEA     | neurobeachin                                                      | -1,4272 | 0,3718 | 0,0000 | 0,0000 |
| ENSG00000160796 | NBEAL2   | neurobeachin-like 2                                               | 0,7693  | 1,7045 | 0,0000 | 0,0000 |
| ENSG00000104320 | NBN      | nibrin                                                            | -0,4078 | 0,7538 | 0,0001 | 0,0008 |
| ENSG00000104490 | NCALD    | neurocalcin delta                                                 | -1,2876 | 0,4096 | 0,0000 | 0,0000 |
| ENSG00000149294 | NCAM1    | neural cell adhesion molecule 1                                   | 1,1600  | 2,2346 | 0,0000 | 0,0000 |
| ENSG00000136937 | NCBP1    | nuclear cap binding protein subunit 1, 80kDa                      | -0,4446 | 0,7348 | 0,0000 | 0,0000 |
| ENSG00000144959 | NCEH1    | neutral cholesterol ester hydrolase 1                             | -0,5217 | 0,6965 | 0,0000 | 0,0000 |
| ENSG00000116701 | NCF2     | neutrophil cytosolic factor 2                                     | 1,0394  | 2,0553 | 0,0000 | 0,0001 |
| ENSG00000239213 | NCK1-AS1 | NCK1 antisense RNA 1 (head to head)                               | 0,4759  | 1,3907 | 0,0003 | 0,0032 |
| ENSG00000213672 | NCKIPSD  | NCK interacting protein with SH3 domain                           | 0,5665  | 1,4809 | 0,0000 | 0,0000 |
| ENSG00000115053 | NCL      | nucleolin                                                         | -0,5501 | 0,6830 | 0,0000 | 0,0000 |
| ENSG00000266412 | NCOA4    | nuclear receptor coactivator 4                                    | -0,4332 | 0,7406 | 0,0000 | 0,0000 |
| ENSG00000124160 | NCOA5    | nuclear receptor coactivator 5                                    | -0,4221 | 0,7463 | 0,0000 | 0,0000 |
| ENSG00000240108 | NCOR1P1  | nuclear receptor corepressor 1 pseudogene 1                       | 1,2944  | 2,4527 | 0,0000 | 0,0000 |
| ENSG00000188211 | NCR3LG1  | natural killer cell cytotoxicity receptor 3 ligand 1              | -0,5768 | 0,6704 | 0,0000 | 0,0000 |
| ENSG00000166579 | NDEL1    | nudE neurodevelopment protein 1-like 1                            | -0,3874 | 0,7645 | 0,0000 | 0,0000 |
| ENSG00000102471 | NDFIP2   | Nedd4 family interacting protein 2                                | -0,9094 | 0,5324 | 0,0000 | 0,0000 |
| ENSG00000185115 | NDNL2    | necdin-like 2, SMC5-SMC6 complex component                        | -0,4634 | 0,7253 | 0,0000 | 0,0004 |
| ENSG00000124479 | NDP      | Norrie disease (pseudoglioma)                                     | -1,0871 | 0,4707 | 0,0000 | 0,0000 |

|                 |          |                                                                                       |         |        |        |        |
|-----------------|----------|---------------------------------------------------------------------------------------|---------|--------|--------|--------|
| ENSG00000104419 | NDRG1    | N-myc downstream regulated 1                                                          | 0,9860  | 1,9808 | 0,0000 | 0,0000 |
| ENSG00000103034 | NDRG4    | NDRG family member 4                                                                  | 0,7671  | 1,7019 | 0,0000 | 0,0000 |
| ENSG00000185633 | NDUFA4L2 | NADH dehydrogenase (ubiquinone) 1 alpha subcomplex, 4-like 2                          | 0,8035  | 1,7454 | 0,0006 | 0,0060 |
| ENSG00000123545 | NDUF4F4  | NADH dehydrogenase (ubiquinone) complex I, assembly factor 4                          | -0,6985 | 0,6162 | 0,0000 | 0,0000 |
| ENSG00000245532 | NEAT1    | nuclear paraspeckle assembly transcript 1 (non-protein coding)                        | 0,9105  | 1,8797 | 0,0000 | 0,0000 |
| ENSG00000078114 | NEBL     | nebulette                                                                             | -0,5334 | 0,6909 | 0,0000 | 0,0000 |
| ENSG00000125967 | NECAB3   | N-terminal EF-hand calcium binding protein 3                                          | 0,5378  | 1,4518 | 0,0000 | 0,0007 |
| ENSG00000140398 | NEIL1    | nei-like DNA glycosylase 1                                                            | 0,4342  | 1,3511 | 0,0005 | 0,0052 |
| ENSG00000160602 | NEK8     | NIMA-related kinase 8                                                                 | 0,5875  | 1,5026 | 0,0000 | 0,0000 |
| ENSG00000165525 | NEMF     | nuclear export mediator factor                                                        | -0,4395 | 0,7374 | 0,0000 | 0,0001 |
| ENSG00000173848 | NET1     | neuroepithelial cell transforming 1                                                   | -0,7381 | 0,5995 | 0,0000 | 0,0000 |
| ENSG00000171208 | NETO2    | neuropilin (NRP) and tolloid (TLL)-like 2                                             | -0,4531 | 0,7305 | 0,0000 | 0,0002 |
| ENSG00000124257 | NEURL2   | neuralized E3 ubiquitin protein ligase 2                                              | 0,7956  | 1,7357 | 0,0003 | 0,0030 |
| ENSG00000100968 | NFATC4   | nuclear factor of activated T-cells, cytoplasmic, calcineurin-dependent 4             | 0,5069  | 1,4210 | 0,0000 | 0,0005 |
| ENSG00000050344 | NFE2L3   | nuclear factor, erythroid 2-like 3                                                    | -0,7718 | 0,5857 | 0,0000 | 0,0000 |
| ENSG00000162599 | NFIA     | nuclear factor I/A                                                                    | -0,4607 | 0,7266 | 0,0002 | 0,0025 |
| ENSG00000147862 | NFIB     | nuclear factor I/B                                                                    | 0,5041  | 1,4182 | 0,0000 | 0,0001 |
| ENSG00000165030 | NFIL3    | nuclear factor, interleukin 3 regulated                                               | 0,4233  | 1,3410 | 0,0000 | 0,0002 |
| ENSG00000008441 | NFIX     | nuclear factor I/X (CCAAT-binding transcription factor)                               | 0,5380  | 1,4520 | 0,0000 | 0,0000 |
| ENSG00000109320 | NFKB1    | nuclear factor of kappa light polypeptide gene enhancer in B-cells 1                  | -0,5318 | 0,6917 | 0,0000 | 0,0000 |
| ENSG00000100906 | NFKBIA   | nuclear factor of kappa light polypeptide gene enhancer in B-cells inhibitor, alpha   | -0,4122 | 0,7515 | 0,0000 | 0,0000 |
| ENSG00000146232 | NFKBIE   | nuclear factor of kappa light polypeptide gene enhancer in B-cells inhibitor, epsilon | -0,7802 | 0,5823 | 0,0000 | 0,0000 |
| ENSG00000144802 | NFKBIZ   | nuclear factor of kappa light polypeptide gene enhancer in B-cells inhibitor, zeta    | -0,6065 | 0,6568 | 0,0004 | 0,0046 |
| ENSG00000120837 | NFYB     | nuclear transcription factor Y, beta                                                  | -0,3864 | 0,7650 | 0,0001 | 0,0011 |
| ENSG00000066248 | NGEF     | neuronal guanine nucleotide exchange factor                                           | 0,7871  | 1,7256 | 0,0000 | 0,0000 |
| ENSG00000064300 | NGFR     | nerve growth factor receptor                                                          | 0,5318  | 1,4458 | 0,0002 | 0,0019 |
| ENSG00000155438 | NIFK     | nucleolar protein interacting with the FHA domain of MKI67                            | -0,5729 | 0,6723 | 0,0000 | 0,0000 |
| ENSG00000131669 | NINJ1    | ninjurin 1                                                                            | 0,4396  | 1,3563 | 0,0008 | 0,0076 |
| ENSG00000132603 | NIP7     | NIP7, nucleolar pre-rRNA processing protein                                           | -0,7054 | 0,6133 | 0,0000 | 0,0000 |
| ENSG00000140157 | NIPA2    | non imprinted in Prader-Willi/Angelman syndrome 2                                     | -0,8018 | 0,5736 | 0,0000 | 0,0000 |
| ENSG00000163293 | NIPAL1   | NIPA-like domain containing 1                                                         | -0,7362 | 0,6003 | 0,0000 | 0,0000 |

|                 |          |                                                            |         |        |        |        |
|-----------------|----------|------------------------------------------------------------|---------|--------|--------|--------|
| ENSG00000104361 | NIPAL2   | NIPA-like domain containing 2                              | -0,4991 | 0,7076 | 0,0002 | 0,0020 |
| ENSG00000172548 | NIPAL4   | NIPA-like domain containing 4                              | -1,2509 | 0,4202 | 0,0000 | 0,0000 |
| ENSG00000184117 | NIPSNAP1 | nipsnap homolog 1 (C. elegans)                             | 0,5783  | 1,4931 | 0,0000 | 0,0000 |
| ENSG00000158793 | NIT1     | nitrilase 1                                                | 0,5371  | 1,4511 | 0,0000 | 0,0000 |
| ENSG00000140807 | NKD1     | naked cuticle homolog 1 (Drosophila)                       | 0,6214  | 1,5384 | 0,0000 | 0,0000 |
| ENSG00000145506 | NKD2     | naked cuticle homolog 2 (Drosophila)                       | 1,0421  | 2,0592 | 0,0000 | 0,0000 |
| ENSG00000169992 | NLGN2    | neuroligin 2                                               | 0,5343  | 1,4482 | 0,0000 | 0,0000 |
| ENSG00000196338 | NLGN3    | neuroligin 3                                               | 0,9647  | 1,9517 | 0,0002 | 0,0021 |
| ENSG00000167984 | NLRC3    | NLR family, CARD domain containing 3                       | 0,8298  | 1,7774 | 0,0006 | 0,0062 |
| ENSG00000091592 | NLRP1    | NLR family, pyrin domain containing 1                      | 1,2860  | 2,4385 | 0,0000 | 0,0000 |
| ENSG00000160703 | NLRX1    | NLR family member X1                                       | 0,5819  | 1,4968 | 0,0000 | 0,0002 |
| ENSG00000239672 | NME1     | NME/NM23 nucleoside diphosphate kinase 1                   | -0,4883 | 0,7129 | 0,0000 | 0,0002 |
| ENSG00000103024 | NME3     | NME/NM23 nucleoside diphosphate kinase 3                   | 0,9364  | 1,9137 | 0,0000 | 0,0001 |
| ENSG00000103202 | NME4     | NME/NM23 nucleoside diphosphate kinase 4                   | 0,5336  | 1,4475 | 0,0000 | 0,0000 |
| ENSG00000157064 | NMNAT2   | nicotinamide nucleotide adenyltransferase 2                | -0,4146 | 0,7502 | 0,0003 | 0,0030 |
| ENSG00000153406 | NMRAL1   | NmrA-like family domain containing 1                       | 0,4906  | 1,4050 | 0,0000 | 0,0000 |
| ENSG00000109255 | NMU      | neuromedin U                                               | -0,5196 | 0,6976 | 0,0001 | 0,0014 |
| ENSG00000173145 | NOC3L    | NOC3-like DNA replication regulator                        | -0,6650 | 0,6307 | 0,0000 | 0,0000 |
| ENSG00000167207 | NOD2     | nucleotide-binding oligomerization domain containing 2     | 0,4601  | 1,3756 | 0,0000 | 0,0000 |
| ENSG00000115761 | NOL10    | nucleolar protein 10                                       | -0,4864 | 0,7138 | 0,0000 | 0,0000 |
| ENSG00000130935 | NOL11    | nucleolar protein 11                                       | -0,4564 | 0,7288 | 0,0000 | 0,0002 |
| ENSG00000140939 | NOL3     | nucleolar protein 3 (apoptosis repressor with CARD domain) | 0,4137  | 1,3321 | 0,0000 | 0,0007 |
| ENSG00000165271 | NOL6     | nucleolar protein 6 (RNA-associated)                       | -0,5063 | 0,7040 | 0,0000 | 0,0000 |
| ENSG00000198000 | NOL8     | nucleolar protein 8                                        | -0,4970 | 0,7086 | 0,0000 | 0,0000 |
| ENSG00000166197 | NOLC1    | nucleolar and coiled-body phosphoprotein 1                 | -0,5073 | 0,7035 | 0,0000 | 0,0000 |
| ENSG00000103512 | NOMO1    | NODAL modulator 1                                          | -0,4199 | 0,7475 | 0,0000 | 0,0003 |
| ENSG00000048162 | NOP16    | NOP16 nucleolar protein                                    | -0,5494 | 0,6833 | 0,0000 | 0,0000 |
| ENSG00000101361 | NOP56    | NOP56 ribonucleoprotein                                    | -0,5184 | 0,6981 | 0,0000 | 0,0000 |
| ENSG00000055044 | NOP58    | NOP58 ribonucleoprotein                                    | -0,4449 | 0,7347 | 0,0000 | 0,0002 |
| ENSG00000196943 | NOP9     | NOP9 nucleolar protein                                     | -0,4648 | 0,7246 | 0,0000 | 0,0000 |
| ENSG00000185269 | NOTUM    | notum pectinacetyltransferase homolog (Drosophila)         | 0,9134  | 1,8835 | 0,0000 | 0,0004 |

|                 |           |                                                                      |         |        |        |        |
|-----------------|-----------|----------------------------------------------------------------------|---------|--------|--------|--------|
| ENSG00000119655 | NPC2      | Niemann-Pick disease, type C2                                        | -0,7041 | 0,6138 | 0,0000 | 0,0000 |
| ENSG00000107281 | NPDC1     | neural proliferation, differentiation and control, 1                 | 0,4920  | 1,4064 | 0,0002 | 0,0027 |
| ENSG00000215440 | NPEPL1    | aminopeptidase-like 1                                                | 0,4600  | 1,3756 | 0,0004 | 0,0041 |
| ENSG00000144061 | NPHP1     | nephronophthisis 1 (juvenile)                                        | 0,5211  | 1,4350 | 0,0002 | 0,0020 |
| ENSG00000161270 | NPHS1     | nephrosis 1, congenital, Finnish type (nephrin)                      | 0,8967  | 1,8618 | 0,0001 | 0,0013 |
| ENSG00000181163 | NPM1      | nucleophosmin (nucleolar phosphoprotein B23, numatrin)               | -0,4572 | 0,7284 | 0,0000 | 0,0005 |
| ENSG00000168743 | NPNT      | nephronectin                                                         | 1,2528  | 2,3830 | 0,0000 | 0,0000 |
| ENSG00000126368 | NR1D1     | nuclear receptor subfamily 1, group D, member 1                      | 1,0727  | 2,1033 | 0,0000 | 0,0000 |
| ENSG00000237187 | NR2F1-AS1 | NR2F1 antisense RNA 1                                                | -0,4788 | 0,7176 | 0,0011 | 0,0099 |
| ENSG00000185551 | NR2F2     | nuclear receptor subfamily 2, group F, member 2                      | -0,8872 | 0,5407 | 0,0000 | 0,0000 |
| ENSG00000247809 | NR2F2-AS1 | NR2F2 antisense RNA 1                                                | -0,7222 | 0,6062 | 0,0003 | 0,0029 |
| ENSG00000153234 | NR4A2     | nuclear receptor subfamily 4, group A, member 2                      | 0,6870  | 1,6099 | 0,0000 | 0,0002 |
| ENSG00000185189 | NRBP2     | nuclear receptor binding protein 2                                   | 0,6154  | 1,5320 | 0,0000 | 0,0001 |
| ENSG00000134986 | NREP      | neuronal regeneration related protein                                | 0,7820  | 1,7196 | 0,0000 | 0,0000 |
| ENSG00000180530 | NRIP1     | nuclear receptor interacting protein 1                               | -0,8064 | 0,5718 | 0,0000 | 0,0000 |
| ENSG00000124785 | NRN1      | neuritin 1                                                           | 0,9796  | 1,9719 | 0,0000 | 0,0000 |
| ENSG00000099250 | NRP1      | neuropilin 1                                                         | -0,9289 | 0,5253 | 0,0000 | 0,0000 |
| ENSG00000125841 | NRSN2     | neurensin 2                                                          | 0,3809  | 1,3021 | 0,0000 | 0,0002 |
| ENSG00000147383 | NSDHL     | NAD(P) dependent steroid dehydrogenase-like                          | -0,4265 | 0,7441 | 0,0000 | 0,0000 |
| ENSG00000073969 | NSF       | N-ethylmaleimide-sensitive factor                                    | -0,4032 | 0,7562 | 0,0002 | 0,0020 |
| ENSG00000165802 | NSMF      | NMDA receptor synaptonuclear signaling and neuronal migration factor | 0,5020  | 1,4162 | 0,0000 | 0,0000 |
| ENSG00000037474 | NSUN2     | NOP2/Sun RNA methyltransferase family, member 2                      | -0,4805 | 0,7167 | 0,0000 | 0,0000 |
| ENSG00000144130 | NT5DC4    | 5'-nucleotidase domain containing 4                                  | 0,5746  | 1,4893 | 0,0000 | 0,0002 |
| ENSG00000135318 | NT5E      | 5'-nucleotidase, ecto (CD73)                                         | -1,6011 | 0,3296 | 0,0000 | 0,0000 |
| ENSG00000205309 | NT5M      | 5',3'-nucleotidase, mitochondrial                                    | 0,6808  | 1,6030 | 0,0000 | 0,0001 |
| ENSG00000185652 | NTF3      | neurotrophin 3                                                       | -1,0463 | 0,4842 | 0,0000 | 0,0000 |
| ENSG00000182667 | NTM       | neurotrimin                                                          | 1,0089  | 2,0124 | 0,0000 | 0,0000 |
| ENSG00000196358 | NTNG2     | netrin G2                                                            | 0,9081  | 1,8766 | 0,0000 | 0,0000 |
| ENSG00000148053 | NTRK2     | neurotrophic tyrosine kinase, receptor, type 2                       | -0,6725 | 0,6274 | 0,0000 | 0,0000 |
| ENSG00000070081 | NUCB2     | nucleobindin 2                                                       | 0,4778  | 1,3926 | 0,0000 | 0,0000 |
| ENSG00000069275 | NUCKS1    | nuclear casein kinase and cyclin-dependent kinase substrate 1        | -0,4901 | 0,7120 | 0,0000 | 0,0000 |

|                 |         |                                                                    |         |        |        |        |
|-----------------|---------|--------------------------------------------------------------------|---------|--------|--------|--------|
| ENSG00000120526 | NUDCD1  | NudC domain containing 1                                           | -0,5699 | 0,6737 | 0,0000 | 0,0000 |
| ENSG00000106268 | NUDT1   | nudix (nucleoside diphosphate linked moiety X)-type motif 1        | 0,5491  | 1,4632 | 0,0000 | 0,0001 |
| ENSG00000136159 | NUDT15  | nudix (nucleoside diphosphate linked moiety X)-type motif 15       | -0,7160 | 0,6088 | 0,0000 | 0,0000 |
| ENSG00000186364 | NUDT17  | nudix (nucleoside diphosphate linked moiety X)-type motif 17       | 0,7344  | 1,6638 | 0,0000 | 0,0000 |
| ENSG00000140876 | NUDT7   | nudix (nucleoside diphosphate linked moiety X)-type motif 7        | 0,5157  | 1,4297 | 0,0009 | 0,0089 |
| ENSG00000083635 | NUFIP1  | nuclear fragile X mental retardation protein interacting protein 1 | -0,5722 | 0,6726 | 0,0000 | 0,0000 |
| ENSG00000105245 | NUMBL   | numb homolog (Drosophila)-like                                     | 0,5946  | 1,5101 | 0,0000 | 0,0000 |
| ENSG00000124789 | NUP153  | nucleoporin 153kDa                                                 | -0,4191 | 0,7479 | 0,0000 | 0,0000 |
| ENSG00000163002 | NUP35   | nucleoporin 35kDa                                                  | -0,4589 | 0,7275 | 0,0000 | 0,0005 |
| ENSG00000139496 | NUP58   | nucleoporin 58kDa                                                  | -0,4352 | 0,7396 | 0,0000 | 0,0000 |
| ENSG00000136243 | NUPL2   | nucleoporin like 2                                                 | -0,7391 | 0,5991 | 0,0000 | 0,0000 |
| ENSG00000153989 | NUS1    | NUS1 dehydrodolichyl diphosphate synthase subunit                  | -0,5213 | 0,6967 | 0,0000 | 0,0000 |
| ENSG00000182575 | NXPH3   | neurexophilin 3                                                    | 1,3719  | 2,5881 | 0,0000 | 0,0000 |
| ENSG00000111335 | OAS2    | 2'-5'-oligoadenylate synthetase 2, 69/71kDa                        | 0,3914  | 1,3116 | 0,0000 | 0,0006 |
| ENSG00000111331 | OAS3    | 2'-5'-oligoadenylate synthetase 3, 100kDa                          | -0,4733 | 0,7203 | 0,0000 | 0,0000 |
| ENSG00000135114 | OASL    | 2'-5'-oligoadenylate synthetase-like                               | 0,8850  | 1,8467 | 0,0002 | 0,0021 |
| ENSG00000107960 | OBFC1   | oligonucleotide/oligosaccharide-binding fold containing 1          | 0,3937  | 1,3138 | 0,0002 | 0,0020 |
| ENSG00000124006 | OBSL1   | obscurin-like 1                                                    | 0,4409  | 1,3574 | 0,0002 | 0,0027 |
| ENSG00000099330 | OCEL1   | occludin/ELL domain containing 1                                   | 0,9396  | 1,9179 | 0,0000 | 0,0000 |
| ENSG00000115758 | ODC1    | ornithine decarboxylase 1                                          | -0,5836 | 0,6673 | 0,0000 | 0,0000 |
| ENSG00000197444 | OGDHL   | oxoglutarate dehydrogenase-like                                    | 0,5309  | 1,4448 | 0,0000 | 0,0000 |
| ENSG00000119900 | OGFRL1  | opioid growth factor receptor-like 1                               | -0,4879 | 0,7131 | 0,0000 | 0,0001 |
| ENSG00000130558 | OLFM1   | olfactomedin 1                                                     | -0,6353 | 0,6438 | 0,0000 | 0,0000 |
| ENSG00000185585 | OLFML2A | olfactomedin-like 2A                                               | 0,8802  | 1,8406 | 0,0000 | 0,0000 |
| ENSG00000116774 | OLFML3  | olfactomedin-like 3                                                | 0,9431  | 1,9227 | 0,0002 | 0,0026 |
| ENSG00000198836 | OPA1    | optic atrophy 1 (autosomal dominant)                               | -0,4181 | 0,7484 | 0,0000 | 0,0000 |
| ENSG00000178814 | OPLAH   | 5-oxoprolinase (ATP-hydrolysing)                                   | 1,0086  | 2,0120 | 0,0000 | 0,0000 |
| ENSG00000125510 | OPRL1   | opiate receptor-like 1                                             | 0,9605  | 1,9459 | 0,0000 | 0,0003 |
| ENSG00000183251 | OR51B4  | olfactory receptor, family 51, subfamily B, member 4               | 1,6260  | 3,0866 | 0,0000 | 0,0000 |
| ENSG00000175938 | ORAI3   | ORAI calcium release-activated calcium modulator 3                 | 0,4907  | 1,4051 | 0,0000 | 0,0000 |
| ENSG00000164815 | ORC5    | origin recognition complex, subunit 5                              | -0,4116 | 0,7518 | 0,0000 | 0,0003 |

|                 |           |                                                           |         |        |        |        |
|-----------------|-----------|-----------------------------------------------------------|---------|--------|--------|--------|
| ENSG00000184792 | OSBP2     | oxysterol binding protein 2                               | 0,7144  | 1,6408 | 0,0000 | 0,0000 |
| ENSG00000021762 | OSBPL5    | oxysterol binding protein-like 5                          | 1,1804  | 2,2663 | 0,0000 | 0,0000 |
| ENSG00000116885 | OSCP1     | organic solute carrier partner 1                          | 0,8533  | 1,8067 | 0,0000 | 0,0000 |
| ENSG00000223891 | OSER1-AS1 | OSER1 antisense RNA 1 (head to head)                      | 0,5422  | 1,4562 | 0,0000 | 0,0001 |
| ENSG00000140961 | OSGIN1    | oxidative stress induced growth inhibitor 1               | 0,6282  | 1,5456 | 0,0000 | 0,0007 |
| ENSG00000081087 | OSTM1     | osteopetrosis associated transmembrane protein 1          | -0,4304 | 0,7421 | 0,0000 | 0,0001 |
| ENSG00000089723 | OTUB2     | OTU deubiquitinase, ubiquitin aldehyde binding 2          | -0,4209 | 0,7470 | 0,0001 | 0,0015 |
| ENSG00000165312 | OTUD1     | OTU deubiquitinase 1                                      | 0,4905  | 1,4049 | 0,0003 | 0,0031 |
| ENSG00000164164 | OTUD4     | OTU deubiquitinase 4                                      | -0,3915 | 0,7623 | 0,0000 | 0,0001 |
| ENSG00000155100 | OTUD6B    | OTU domain containing 6B                                  | -0,6011 | 0,6593 | 0,0000 | 0,0000 |
| ENSG00000083720 | OXCT1     | 3-oxoacid CoA transferase 1                               | -0,6981 | 0,6164 | 0,0000 | 0,0000 |
| ENSG00000108405 | P2RX1     | purinergic receptor P2X, ligand gated ion channel, 1      | 1,2804  | 2,4290 | 0,0000 | 0,0000 |
| ENSG00000083454 | P2RX5     | purinergic receptor P2X, ligand gated ion channel, 5      | -0,5168 | 0,6989 | 0,0000 | 0,0003 |
| ENSG00000099957 | P2RX6     | purinergic receptor P2X, ligand gated ion channel, 6      | 1,2458  | 2,3715 | 0,0000 | 0,0000 |
| ENSG00000089041 | P2RX7     | purinergic receptor P2X, ligand gated ion channel, 7      | 1,3688  | 2,5825 | 0,0000 | 0,0000 |
| ENSG00000101104 | PABPC1L   | poly(A) binding protein, cytoplasmic 1-like               | 0,4161  | 1,3343 | 0,0001 | 0,0018 |
| ENSG00000165912 | PACIN3    | protein kinase C and casein kinase substrate in neurons 3 | 0,3950  | 1,3149 | 0,0006 | 0,0062 |
| ENSG00000142619 | PADI3     | peptidyl arginine deiminase, type III                     | 0,6593  | 1,5793 | 0,0000 | 0,0000 |
| ENSG00000122133 | PAEP      | progesterone-associated endometrial protein               | 1,4327  | 2,6995 | 0,0000 | 0,0000 |
| ENSG00000149269 | PAK1      | p21 protein (Cdc42/Rac)-activated kinase 1                | 0,6520  | 1,5714 | 0,0000 | 0,0000 |
| ENSG00000111845 | PAK1IP1   | PAK1 interacting protein 1                                | -0,5501 | 0,6830 | 0,0000 | 0,0000 |
| ENSG00000145730 | PAM       | peptidylglycine alpha-amidating monooxygenase             | 0,4962  | 1,4105 | 0,0000 | 0,0000 |
| ENSG00000135473 | PAN2      | PAN2 poly(A) specific ribonuclease subunit                | 0,5605  | 1,4748 | 0,0000 | 0,0000 |
| ENSG00000261485 | PAN3-AS1  | PAN3 antisense RNA 1                                      | -0,7869 | 0,5796 | 0,0000 | 0,0003 |
| ENSG00000110218 | PANX1     | pannexin 1                                                | -0,6964 | 0,6171 | 0,0000 | 0,0000 |
| ENSG00000090060 | PAPOLA    | poly(A) polymerase alpha                                  | -0,6351 | 0,6439 | 0,0000 | 0,0000 |
| ENSG00000198682 | PAPSS2    | 3'-phosphoadenosine 5'-phosphosulfate synthase 2          | -0,8830 | 0,5422 | 0,0000 | 0,0000 |
| ENSG00000160781 | PAQR6     | progesterone and adiponectin receptor family member VI    | 0,5886  | 1,5038 | 0,0008 | 0,0074 |
| ENSG00000170915 | PAQR8     | progesterone and adiponectin receptor family member VIII  | 0,9587  | 1,9435 | 0,0000 | 0,0000 |
| ENSG00000102981 | PARD6A    | par-6 family cell polarity regulator alpha                | 0,6714  | 1,5926 | 0,0007 | 0,0068 |
| ENSG00000169116 | PARM1     | prostate androgen-regulated mucin-like protein 1          | 1,0471  | 2,0663 | 0,0000 | 0,0000 |



|                 |            |                                                                              |         |        |        |        |
|-----------------|------------|------------------------------------------------------------------------------|---------|--------|--------|--------|
| ENSG00000143799 | PARP1      | poly (ADP-ribose) polymerase 1                                               | -0,4217 | 0,7465 | 0,0000 | 0,0000 |
| ENSG00000178685 | PARP10     | poly (ADP-ribose) polymerase family, member 10                               | 0,6373  | 1,5554 | 0,0001 | 0,0015 |
| ENSG00000138617 | PARP16     | poly (ADP-ribose) polymerase family, member 16                               | 0,3913  | 1,3115 | 0,0003 | 0,0033 |
| ENSG00000041880 | PARP3      | poly (ADP-ribose) polymerase family, member 3                                | 0,4209  | 1,3387 | 0,0000 | 0,0002 |
| ENSG00000102699 | PARP4      | poly (ADP-ribose) polymerase family, member 4                                | -0,8754 | 0,5451 | 0,0000 | 0,0000 |
| ENSG00000224976 | PARP4P2    | poly (ADP-ribose) polymerase family, member 4 pseudogene 2                   | -0,8731 | 0,5460 | 0,0001 | 0,0008 |
| ENSG00000151883 | PARP8      | poly (ADP-ribose) polymerase family, member 8                                | -0,4975 | 0,7083 | 0,0000 | 0,0000 |
| ENSG00000196092 | PAX5       | paired box 5                                                                 | 0,4520  | 1,3679 | 0,0003 | 0,0031 |
| ENSG00000009709 | PAX7       | paired box 7                                                                 | 1,5064  | 2,8410 | 0,0000 | 0,0000 |
| ENSG00000189223 | PAX8-AS1   | PAX8 antisense RNA 1                                                         | -0,4163 | 0,7493 | 0,0000 | 0,0000 |
| ENSG00000273344 | PAXIP1-AS1 | PAXIP1 antisense RNA 1 (head to head)                                        | 0,4478  | 1,3640 | 0,0000 | 0,0002 |
| ENSG00000102390 | PBDC1      | polysaccharide biosynthesis domain containing 1                              | -0,4438 | 0,7352 | 0,0000 | 0,0000 |
| ENSG00000185630 | PBX1       | pre-B-cell leukemia homeobox 1                                               | -0,8185 | 0,5670 | 0,0005 | 0,0055 |
| ENSG00000163346 | PBXIP1     | pre-B-cell leukemia homeobox interacting protein 1                           | 0,9408  | 1,9196 | 0,0000 | 0,0000 |
| ENSG00000090097 | PCBP4      | poly(rC) binding protein 4                                                   | 0,3811  | 1,3023 | 0,0003 | 0,0030 |
| ENSG00000175198 | PCCA       | propionyl CoA carboxylase, alpha polypeptide                                 | -0,4375 | 0,7384 | 0,0002 | 0,0027 |
| ENSG00000197479 | PCDHB11    | protocadherin beta 11                                                        | 0,8839  | 1,8454 | 0,0010 | 0,0089 |
| ENSG00000187372 | PCDHB13    | protocadherin beta 13                                                        | 0,7492  | 1,6809 | 0,0010 | 0,0096 |
| ENSG00000240184 | PCDHGC3    | protocadherin gamma subfamily C, 3                                           | -0,6153 | 0,6528 | 0,0000 | 0,0000 |
| ENSG00000132635 | PCED1A     | PC-esterase domain containing 1A                                             | 0,5043  | 1,4184 | 0,0000 | 0,0001 |
| ENSG00000179715 | PCED1B     | PC-esterase domain containing 1B                                             | 1,5470  | 2,9222 | 0,0000 | 0,0000 |
| ENSG00000126226 | PCID2      | PCI domain containing 2                                                      | -0,7582 | 0,5913 | 0,0000 | 0,0000 |
| ENSG00000100982 | PCIF1      | PDX1 C-terminal inhibiting factor 1                                          | 0,5574  | 1,4716 | 0,0000 | 0,0000 |
| ENSG00000124253 | PCK1       | phosphoenolpyruvate carboxykinase 1 (soluble)                                | 1,1173  | 2,1695 | 0,0000 | 0,0006 |
| ENSG00000100889 | PCK2       | phosphoenolpyruvate carboxykinase 2 (mitochondrial)                          | 0,5449  | 1,4589 | 0,0000 | 0,0000 |
| ENSG00000186472 | PCLO       | piccolo presynaptic cytomatrix protein                                       | -1,0835 | 0,4719 | 0,0000 | 0,0000 |
| ENSG00000168300 | PCMTD1     | protein-L-isoaspartate (D-aspartate) O-methyltransferase domain containing 1 | 0,6115  | 1,5279 | 0,0000 | 0,0000 |
| ENSG00000183036 | PCP4       | Purkinje cell protein 4                                                      | 2,7178  | 6,5787 | 0,0000 | 0,0000 |
| ENSG00000115257 | PCSK4      | proprotein convertase subtilisin/kexin type 4                                | 0,9902  | 1,9865 | 0,0001 | 0,0007 |
| ENSG00000140479 | PCSK6      | proprotein convertase subtilisin/kexin type 6                                | -0,6284 | 0,6469 | 0,0000 | 0,0000 |
| ENSG00000145882 | PCYOX1L    | prenylcysteine oxidase 1 like                                                | 0,7782  | 1,7150 | 0,0000 | 0,0000 |

|                 |        |                                                               |         |        |        |        |
|-----------------|--------|---------------------------------------------------------------|---------|--------|--------|--------|
| ENSG00000150593 | PDCD4  | programmed cell death 4 (neoplastic transformation inhibitor) | 0,4043  | 1,3235 | 0,0000 | 0,0000 |
| ENSG00000186642 | PDE2A  | phosphodiesterase 2A, cGMP-stimulated                         | 0,6423  | 1,5608 | 0,0003 | 0,0036 |
| ENSG00000152270 | PDE3B  | phosphodiesterase 3B, cGMP-inhibited                          | -0,8676 | 0,5481 | 0,0000 | 0,0000 |
| ENSG00000160191 | PDE9A  | phosphodiesterase 9A                                          | -1,0734 | 0,4752 | 0,0000 | 0,0000 |
| ENSG00000145431 | PDGFC  | platelet derived growth factor C                              | 1,1743  | 2,2569 | 0,0000 | 0,0000 |
| ENSG00000113721 | PDGFRB | platelet-derived growth factor receptor, beta polypeptide     | 0,8929  | 1,8569 | 0,0008 | 0,0074 |
| ENSG00000083642 | PDS5B  | PDS5 cohesin associated factor B                              | -0,4595 | 0,7272 | 0,0000 | 0,0000 |
| ENSG00000148459 | PSS1   | prenyl (decaprenyl) diphosphate synthase, subunit 1           | -0,6245 | 0,6487 | 0,0000 | 0,0000 |
| ENSG00000139515 | PDX1   | pancreatic and duodenal homeobox 1                            | -0,5649 | 0,6760 | 0,0000 | 0,0006 |
| ENSG00000186862 | PDZD7  | PDZ domain containing 7                                       | 0,8434  | 1,7942 | 0,0000 | 0,0000 |
| ENSG00000121440 | PDZRN3 | PDZ domain containing ring finger 3                           | 0,5918  | 1,5071 | 0,0000 | 0,0000 |
| ENSG00000162734 | PEA15  | phosphoprotein enriched in astrocytes 15                      | -0,3978 | 0,7590 | 0,0000 | 0,0001 |
| ENSG00000187800 | PEAR1  | platelet endothelial aggregation receptor 1                   | 0,6430  | 1,5616 | 0,0000 | 0,0004 |
| ENSG00000139946 | PELI2  | pellino E3 ubiquitin protein ligase family member 2           | -0,6567 | 0,6343 | 0,0000 | 0,0000 |
| ENSG00000174516 | PELI3  | pellino E3 ubiquitin protein ligase family member 3           | 0,5794  | 1,4942 | 0,0001 | 0,0012 |
| ENSG00000133027 | PEMT   | phosphatidylethanolamine N-methyltransferase                  | 0,5015  | 1,4157 | 0,0002 | 0,0021 |
| ENSG00000179094 | PER1   | period circadian clock 1                                      | 1,3530  | 2,5545 | 0,0000 | 0,0000 |
| ENSG00000112378 | PERP   | PERP, TP53 apoptosis effector                                 | -0,5820 | 0,6680 | 0,0000 | 0,0000 |
| ENSG00000114268 | PFKFB4 | 6-phosphofructo-2-kinase/fructose-2,6-biphosphatase 4         | 0,7575  | 1,6905 | 0,0000 | 0,0000 |
| ENSG00000070087 | PFN2   | profilin 2                                                    | -0,4125 | 0,7513 | 0,0001 | 0,0007 |
| ENSG00000161395 | PGAP3  | post-GPI attachment to proteins 3                             | 0,4569  | 1,3726 | 0,0006 | 0,0061 |
| ENSG00000096088 | PGC    | progastricsin (pepsinogen C)                                  | 0,8877  | 1,8502 | 0,0004 | 0,0044 |
| ENSG00000119630 | PGF    | placental growth factor                                       | 0,5958  | 1,5113 | 0,0007 | 0,0069 |
| ENSG00000169299 | PGM2   | phosphoglucomutase 2                                          | -0,4547 | 0,7297 | 0,0000 | 0,0001 |
| ENSG00000101856 | PGRMC1 | progesterone receptor membrane component 1                    | -0,5380 | 0,6887 | 0,0000 | 0,0000 |
| ENSG00000112511 | PHF1   | PHD finger protein 1                                          | 0,6075  | 1,5237 | 0,0000 | 0,0000 |
| ENSG00000106443 | PHF14  | PHD finger protein 14                                         | -0,6423 | 0,6407 | 0,0000 | 0,0000 |
| ENSG00000135365 | PHF21A | PHD finger protein 21A                                        | 0,6918  | 1,6154 | 0,0000 | 0,0000 |
| ENSG00000226057 | PHF2P2 | PHD finger protein 2 pseudogene 2                             | 1,2885  | 2,4427 | 0,0000 | 0,0000 |
| ENSG0000010318  | PHF7   | PHD finger protein 7                                          | 0,3815  | 1,3027 | 0,0007 | 0,0068 |
| ENSG00000181649 | PHLDA2 | pleckstrin homology-like domain, family A, member 2           | -0,5111 | 0,7017 | 0,0004 | 0,0045 |

|                 |             |                                                               |         |        |        |        |
|-----------------|-------------|---------------------------------------------------------------|---------|--------|--------|--------|
| ENSG00000144824 | PHLDB2      | pleckstrin homology-like domain, family B, member 2           | -0,3937 | 0,7612 | 0,0000 | 0,0001 |
| ENSG00000081913 | PHLPP1      | PH domain and leucine rich repeat protein phosphatase 1       | 0,3951  | 1,3150 | 0,0001 | 0,0008 |
| ENSG00000040199 | PHLPP2      | PH domain and leucine rich repeat protein phosphatase 2       | -0,4041 | 0,7557 | 0,0000 | 0,0002 |
| ENSG00000054148 | PHPT1       | phosphohistidine phosphatase 1                                | 0,4193  | 1,3373 | 0,0002 | 0,0021 |
| ENSG00000038210 | PI4K2B      | phosphatidylinositol 4-kinase type 2 beta                     | -0,4383 | 0,7380 | 0,0000 | 0,0003 |
| ENSG00000105229 | PIAS4       | protein inhibitor of activated STAT, 4                        | 0,4818  | 1,3964 | 0,0001 | 0,0008 |
| ENSG00000083535 | PIBF1       | progesterone immunomodulatory binding factor 1                | -0,4457 | 0,7342 | 0,0000 | 0,0005 |
| ENSG00000173947 | PIFO        | primary cilia formation                                       | 0,9013  | 1,8677 | 0,0005 | 0,0051 |
| ENSG00000101464 | PIGU        | phosphatidylinositol glycan anchor biosynthesis, class U      | -0,3893 | 0,7635 | 0,0001 | 0,0007 |
| ENSG00000277161 | PIGW        | phosphatidylinositol glycan anchor biosynthesis, class W      | -0,7840 | 0,5808 | 0,0000 | 0,0000 |
| ENSG00000155629 | PIK3AP1     | phosphoinositide-3-kinase adaptor protein 1                   | -0,8254 | 0,5643 | 0,0000 | 0,0000 |
| ENSG00000100100 | PIK3IP1     | phosphoinositide-3-kinase interacting protein 1               | 1,6895  | 3,2255 | 0,0000 | 0,0000 |
| ENSG00000228839 | PIK3IP1-AS1 | PIK3IP1 antisense RNA 1 (head to head)                        | 0,9295  | 1,9046 | 0,0006 | 0,0061 |
| ENSG00000145675 | PIK3R1      | phosphoinositide-3-kinase, regulatory subunit 1 (alpha)       | -0,6235 | 0,6491 | 0,0000 | 0,0000 |
| ENSG00000198355 | PIM3        | Pim-3 proto-oncogene, serine/threonine kinase                 | 0,4646  | 1,3799 | 0,0001 | 0,0011 |
| ENSG00000158828 | PINK1       | PTEN induced putative kinase 1                                | 0,5325  | 1,4465 | 0,0000 | 0,0000 |
| ENSG00000117242 | PINK1-AS    | PINK1 antisense RNA                                           | -0,6003 | 0,6596 | 0,0000 | 0,0000 |
| ENSG00000107242 | PIP5K1B     | phosphatidylinositol-4-phosphate 5-kinase, type I, beta       | -0,8859 | 0,5412 | 0,0000 | 0,0000 |
| ENSG00000167103 | PIP5KL1     | phosphatidylinositol-4-phosphate 5-kinase-like 1              | 1,1579  | 2,2313 | 0,0000 | 0,0000 |
| ENSG00000180957 | PITPNB      | phosphatidylinositol transfer protein, beta                   | -0,4737 | 0,7201 | 0,0000 | 0,0000 |
| ENSG00000154217 | PITPNC1     | phosphatidylinositol transfer protein, cytoplasmic 1          | -0,4606 | 0,7267 | 0,0000 | 0,0000 |
| ENSG00000090975 | PITPNM2     | phosphatidylinositol transfer protein, membrane-associated 2  | 0,4960  | 1,4103 | 0,0002 | 0,0027 |
| ENSG00000091622 | PITPNM3     | PITPNM family member 3                                        | 0,8899  | 1,8531 | 0,0000 | 0,0000 |
| ENSG00000164093 | PITX2       | paired-like homeodomain 2                                     | 0,7123  | 1,6384 | 0,0004 | 0,0040 |
| ENSG00000125207 | PIWIL1      | piwi-like RNA-mediated gene silencing 1                       | -1,3850 | 0,3829 | 0,0000 | 0,0000 |
| ENSG00000198961 | PJA2        | praja ring finger 2, E3 ubiquitin protein ligase              | 0,3953  | 1,3152 | 0,0000 | 0,0000 |
| ENSG00000008710 | PKD1        | polycystic kidney disease 1 (autosomal dominant)              | 0,6304  | 1,5480 | 0,0000 | 0,0002 |
| ENSG00000166473 | PKD1L2      | polycystic kidney disease 1-like 2 (gene/pseudogene)          | 0,8091  | 1,7521 | 0,0002 | 0,0022 |
| ENSG00000118762 | PKD2        | polycystic kidney disease 2 (autosomal dominant)              | -0,4818 | 0,7161 | 0,0000 | 0,0000 |
| ENSG00000170927 | PKHD1       | polycystic kidney and hepatic disease 1 (autosomal recessive) | 0,9587  | 1,9435 | 0,0000 | 0,0000 |
| ENSG00000260804 | PKI55       | DKFZp434H1419                                                 | -1,1800 | 0,4413 | 0,0000 | 0,0000 |

|                 |         |                                                                                     |         |        |        |        |
|-----------------|---------|-------------------------------------------------------------------------------------|---------|--------|--------|--------|
| ENSG00000127564 | PKMYT1  | protein kinase, membrane associated tyrosine/threonine 1                            | 0,4950  | 1,4094 | 0,0000 | 0,0003 |
| ENSG00000081277 | PKP1    | plakophilin 1                                                                       | 0,5702  | 1,4848 | 0,0000 | 0,0001 |
| ENSG00000159337 | PLA2G4D | phospholipase A2, group IVD (cytosolic)                                             | 0,9572  | 1,9416 | 0,0000 | 0,0000 |
| ENSG00000168907 | PLA2G4F | phospholipase A2, group IVF                                                         | 1,6325  | 3,1005 | 0,0000 | 0,0000 |
| ENSG00000184381 | PLA2G6  | phospholipase A2, group VI (cytosolic, calcium-independent)                         | 0,7202  | 1,6474 | 0,0000 | 0,0003 |
| ENSG00000170965 | PLAC1   | placenta-specific 1                                                                 | 0,9031  | 1,8700 | 0,0002 | 0,0020 |
| ENSG00000181690 | PLAG1   | pleiomorphic adenoma gene 1                                                         | 0,4576  | 1,3733 | 0,0001 | 0,0014 |
| ENSG00000104368 | PLAT    | plasminogen activator, tissue                                                       | -0,4794 | 0,7173 | 0,0009 | 0,0083 |
| ENSG00000011422 | PLAUR   | plasminogen activator, urokinase receptor                                           | -0,5572 | 0,6796 | 0,0000 | 0,0000 |
| ENSG00000163803 | PLB1    | phospholipase B1                                                                    | 0,7388  | 1,6688 | 0,0000 | 0,0000 |
| ENSG00000187091 | PLCD1   | phospholipase C, delta 1                                                            | 0,9170  | 1,8881 | 0,0000 | 0,0000 |
| ENSG00000149527 | PLCH2   | phospholipase C, eta 2                                                              | 1,3480  | 2,5456 | 0,0000 | 0,0000 |
| ENSG00000075651 | PLD1    | phospholipase D1, phosphatidylcholine-specific                                      | 0,5936  | 1,5090 | 0,0000 | 0,0000 |
| ENSG00000105223 | PLD3    | phospholipase D family, member 3                                                    | 0,7724  | 1,7082 | 0,0000 | 0,0000 |
| ENSG00000115956 | PLEK    | pleckstrin                                                                          | -0,6106 | 0,6549 | 0,0000 | 0,0000 |
| ENSG00000021300 | PLEKHB1 | pleckstrin homology domain containing, family B (evectins) member 1                 | 1,3020  | 2,4658 | 0,0000 | 0,0000 |
| ENSG00000175985 | PLEKHD1 | pleckstrin homology domain containing, family D (with coiled-coil domains) member 1 | 0,8138  | 1,7579 | 0,0002 | 0,0025 |
| ENSG00000068137 | PLEKHH3 | pleckstrin homology domain containing, family H (with MyTH4 domain) member 3        | 0,9100  | 1,8790 | 0,0000 | 0,0000 |
| ENSG00000225190 | PLEKHM1 | pleckstrin homology domain containing, family M (with RUN domain) member 1          | 0,5454  | 1,4595 | 0,0000 | 0,0006 |
| ENSG00000178385 | PLEKHM3 | pleckstrin homology domain containing, family M, member 3                           | 0,9615  | 1,9473 | 0,0000 | 0,0000 |
| ENSG00000145632 | PLK2    | polo-like kinase 2                                                                  | -0,6202 | 0,6506 | 0,0000 | 0,0000 |
| ENSG00000162407 | PLPP3   | phospholipid phosphatase 3                                                          | -0,4283 | 0,7431 | 0,0004 | 0,0045 |
| ENSG00000105520 | PLPPR2  | phospholipid phosphatase related 2                                                  | 0,6215  | 1,5385 | 0,0000 | 0,0005 |
| ENSG00000102024 | PLS3    | plastin 3                                                                           | -0,3942 | 0,7609 | 0,0000 | 0,0001 |
| ENSG00000221866 | PLXNA4  | plexin A4                                                                           | 0,8548  | 1,8085 | 0,0008 | 0,0079 |
| ENSG00000136040 | PLXNC1  | plexin C1                                                                           | -0,7205 | 0,6069 | 0,0002 | 0,0023 |
| ENSG00000124225 | PMEPA1  | prostate transmembrane protein, androgen induced 1                                  | -0,9484 | 0,5182 | 0,0000 | 0,0000 |
| ENSG00000100417 | PMM1    | phosphomannomutase 1                                                                | 0,4946  | 1,4090 | 0,0000 | 0,0002 |
| ENSG00000140650 | PMM2    | phosphomannomutase 2                                                                | -0,4496 | 0,7323 | 0,0000 | 0,0004 |
| ENSG00000240694 | PNMA2   | paraneoplastic Ma antigen 2                                                         | -0,8564 | 0,5523 | 0,0000 | 0,0000 |
| ENSG00000141744 | PNMT    | phenylethanolamine N-methyltransferase                                              | 1,0949  | 2,1360 | 0,0001 | 0,0009 |

|                 |          |                                                                                     |         |        |        |        |
|-----------------|----------|-------------------------------------------------------------------------------------|---------|--------|--------|--------|
| ENSG00000100941 | PNN      | pinin, desmosome associated protein                                                 | -0,4846 | 0,7147 | 0,0000 | 0,0000 |
| ENSG00000115946 | PNO1     | partner of NOB1 homolog                                                             | -0,6879 | 0,6207 | 0,0000 | 0,0000 |
| ENSG00000198805 | PNP      | purine nucleoside phosphorylase                                                     | -0,3878 | 0,7643 | 0,0001 | 0,0009 |
| ENSG00000177666 | PNPLA2   | patatin-like phospholipase domain containing 2                                      | 0,5327  | 1,4466 | 0,0000 | 0,0000 |
| ENSG00000100344 | PNPLA3   | patatin-like phospholipase domain containing 3                                      | -0,4773 | 0,7183 | 0,0008 | 0,0079 |
| ENSG00000032444 | PNPLA6   | patatin-like phospholipase domain containing 6                                      | 0,5328  | 1,4467 | 0,0001 | 0,0017 |
| ENSG00000130653 | PNPLA7   | patatin-like phospholipase domain containing 7                                      | 0,9156  | 1,8863 | 0,0001 | 0,0011 |
| ENSG00000138035 | PNPT1    | polyribonucleotide nucleotidyltransferase 1                                         | -0,4466 | 0,7338 | 0,0000 | 0,0001 |
| ENSG00000146278 | PNRC1    | proline-rich nuclear receptor coactivator 1                                         | 0,7030  | 1,6279 | 0,0000 | 0,0000 |
| ENSG00000139323 | POC1B    | POC1 centriolar protein B                                                           | -0,5151 | 0,6997 | 0,0000 | 0,0000 |
| ENSG00000163389 | POGLUT1  | protein O-glucosyltransferase 1                                                     | -0,4029 | 0,7563 | 0,0006 | 0,0063 |
| ENSG00000175482 | POLD4    | polymerase (DNA-directed), delta 4, accessory subunit                               | 0,7973  | 1,7379 | 0,0000 | 0,0000 |
| ENSG00000148229 | POLE3    | polymerase (DNA directed), epsilon 3, accessory subunit                             | -0,4720 | 0,7209 | 0,0000 | 0,0000 |
| ENSG00000166169 | POLL     | polymerase (DNA directed), lambda                                                   | 0,5256  | 1,4395 | 0,0000 | 0,0000 |
| ENSG00000125630 | POLR1B   | polymerase (RNA) I polypeptide B, 128kDa                                            | -0,5463 | 0,6848 | 0,0000 | 0,0000 |
| ENSG00000100413 | POLR3H   | polymerase (RNA) III (DNA directed) polypeptide H (22.9kD)                          | -0,4584 | 0,7278 | 0,0000 | 0,0001 |
| ENSG00000161980 | POLR3K   | polymerase (RNA) III (DNA directed) polypeptide K, 12.3 kDa                         | -0,4355 | 0,7394 | 0,0002 | 0,0019 |
| ENSG00000132963 | POMP     | proteasome maturation protein                                                       | -0,6845 | 0,6222 | 0,0000 | 0,0000 |
| ENSG00000130714 | POMT1    | protein-O-mannosyltransferase 1                                                     | 0,3907  | 1,3111 | 0,0002 | 0,0020 |
| ENSG00000009830 | POMT2    | protein-O-mannosyltransferase 2                                                     | -0,4060 | 0,7547 | 0,0000 | 0,0000 |
| ENSG00000105854 | PON2     | paraoxonase 2                                                                       | -0,5433 | 0,6862 | 0,0000 | 0,0000 |
| ENSG00000104356 | POP1     | POP1 homolog, ribonuclease P/MRP subunit                                            | -0,7906 | 0,5781 | 0,0000 | 0,0000 |
| ENSG00000172336 | POP7     | POP7 homolog, ribonuclease P/MRP subunit                                            | -0,4256 | 0,7445 | 0,0000 | 0,0003 |
| ENSG00000128513 | POT1     | protection of telomeres 1                                                           | 0,4541  | 1,3699 | 0,0000 | 0,0001 |
| ENSG00000152192 | POU4F1   | POU class 4 homeobox 1                                                              | -1,6260 | 0,3240 | 0,0000 | 0,0000 |
| ENSG00000184271 | POU6F1   | POU class 6 homeobox 1                                                              | 0,5895  | 1,5047 | 0,0001 | 0,0011 |
| ENSG00000186951 | PPARA    | peroxisome proliferator-activated receptor alpha                                    | 0,7040  | 1,6291 | 0,0000 | 0,0000 |
| ENSG00000155846 | PPARGC1B | peroxisome proliferator-activated receptor gamma, coactivator 1 beta                | -0,7360 | 0,6004 | 0,0000 | 0,0000 |
| ENSG00000143847 | PPFIA4   | protein tyrosine phosphatase, receptor type, f polypeptide (PTPRF), interacting pro | 0,9423  | 1,9216 | 0,0000 | 0,0000 |
| ENSG00000166387 | PPFIBP2  | PTPRF interacting protein, binding protein 2 (liprin beta 2)                        | 0,9112  | 1,8806 | 0,0000 | 0,0000 |
| ENSG00000134283 | PPHLN1   | periphilin 1                                                                        | -0,4004 | 0,7576 | 0,0001 | 0,0012 |

|                 |             |                                                                          |         |        |        |        |
|-----------------|-------------|--------------------------------------------------------------------------|---------|--------|--------|--------|
| ENSG00000196262 | PPIA        | peptidylprolyl isomerase A (cyclophilin A)                               | -0,4105 | 0,7524 | 0,0001 | 0,0008 |
| ENSG00000219797 | PPIAP9      | peptidylprolyl isomerase A (cyclophilin A) pseudogene 9                  | -0,5935 | 0,6627 | 0,0008 | 0,0073 |
| ENSG00000108179 | PPIF        | peptidylprolyl isomerase F                                               | -0,5073 | 0,7035 | 0,0000 | 0,0000 |
| ENSG00000145725 | PPP5K2      | diphosphoinositol pentakisphosphate kinase 2                             | -0,4907 | 0,7117 | 0,0000 | 0,0000 |
| ENSG00000118898 | PPL         | periplakin                                                               | 0,5760  | 1,4907 | 0,0000 | 0,0000 |
| ENSG00000115241 | PPM1G       | protein phosphatase, Mg2+/Mn2+ dependent, 1G                             | -0,3787 | 0,7692 | 0,0000 | 0,0003 |
| ENSG00000163590 | PPM1L       | protein phosphatase, Mg2+/Mn2+ dependent, 1L                             | -0,4465 | 0,7338 | 0,0000 | 0,0001 |
| ENSG00000164088 | PPM1M       | protein phosphatase, Mg2+/Mn2+ dependent, 1M                             | 0,4206  | 1,3384 | 0,0000 | 0,0006 |
| ENSG00000143224 | PPOX        | protoporphyrinogen oxidase                                               | 0,5143  | 1,4283 | 0,0000 | 0,0000 |
| ENSG00000186298 | PPP1CC      | protein phosphatase 1, catalytic subunit, gamma isozyme                  | -0,5288 | 0,6931 | 0,0000 | 0,0000 |
| ENSG00000087074 | PPP1R15A    | protein phosphatase 1, regulatory subunit 15A                            | 0,6901  | 1,6134 | 0,0000 | 0,0000 |
| ENSG00000101445 | PPP1R16B    | protein phosphatase 1, regulatory subunit 16B                            | 1,0476  | 2,0671 | 0,0001 | 0,0017 |
| ENSG00000162148 | PPP1R32     | protein phosphatase 1, regulatory subunit 32                             | 1,3744  | 2,5926 | 0,0000 | 0,0000 |
| ENSG00000104866 | PPP1R37     | protein phosphatase 1, regulatory subunit 37                             | 0,4501  | 1,3662 | 0,0009 | 0,0085 |
| ENSG00000173281 | PPP1R3B     | protein phosphatase 1, regulatory subunit 3B                             | 1,0150  | 2,0209 | 0,0000 | 0,0000 |
| ENSG00000119938 | PPP1R3C     | protein phosphatase 1, regulatory subunit 3C                             | 0,9782  | 1,9700 | 0,0000 | 0,0000 |
| ENSG00000137713 | PPP2R1B     | protein phosphatase 2, regulatory subunit A, beta                        | -0,4375 | 0,7384 | 0,0000 | 0,0000 |
| ENSG00000092020 | PPP2R3C     | protein phosphatase 2, regulatory subunit B'', gamma                     | -0,4970 | 0,7086 | 0,0000 | 0,0001 |
| ENSG00000068971 | PPP2R5B     | protein phosphatase 2, regulatory subunit B', beta                       | 0,3995  | 1,3191 | 0,0011 | 0,0099 |
| ENSG00000154845 | PPP4R1      | protein phosphatase 4, regulatory subunit 1                              | -0,5348 | 0,6903 | 0,0000 | 0,0000 |
| ENSG00000100796 | PPP4R3A     | protein phosphatase 4, regulatory subunit 3A                             | -0,4240 | 0,7454 | 0,0000 | 0,0001 |
| ENSG00000119698 | PPP4R4      | protein phosphatase 4, regulatory subunit 4                              | -0,3860 | 0,7652 | 0,0002 | 0,0026 |
| ENSG00000162976 | PQLC3       | PQ loop repeat containing 3                                              | 0,4170  | 1,3351 | 0,0003 | 0,0030 |
| ENSG00000165828 | PRAP1       | proline-rich acidic protein 1                                            | 1,2843  | 2,4357 | 0,0000 | 0,0001 |
| ENSG00000142611 | PRDM16      | PR domain containing 16                                                  | 0,8345  | 1,7832 | 0,0000 | 0,0000 |
| ENSG00000124126 | PREX1       | phosphatidylinositol-3,4,5-trisphosphate-dependent Rac exchange factor 1 | 0,8202  | 1,7657 | 0,0000 | 0,0000 |
| ENSG00000131791 | PRKAB2      | protein kinase, AMP-activated, beta 2 non-catalytic subunit              | 0,4362  | 1,3530 | 0,0000 | 0,0000 |
| ENSG00000106617 | PRKAG2      | protein kinase, AMP-activated, gamma 2 non-catalytic subunit             | -0,5335 | 0,6909 | 0,0000 | 0,0000 |
| ENSG00000224424 | PRKAR2A-AS1 | PRKAR2A antisense RNA 1                                                  | 1,2083  | 2,3106 | 0,0000 | 0,0000 |
| ENSG00000005249 | PRKAR2B     | protein kinase, cAMP-dependent, regulatory, type II, beta                | -1,1241 | 0,4588 | 0,0000 | 0,0000 |
| ENSG00000126583 | PRKCG       | protein kinase C, gamma                                                  | -0,8602 | 0,5509 | 0,0000 | 0,0000 |

|                 |           |                                                                   |         |        |        |        |
|-----------------|-----------|-------------------------------------------------------------------|---------|--------|--------|--------|
| ENSG00000067606 | PRKCZ     | protein kinase C, zeta                                            | 0,4428  | 1,3593 | 0,0001 | 0,0008 |
| ENSG00000183943 | PRKX      | protein kinase, X-linked                                          | -0,8941 | 0,5381 | 0,0000 | 0,0000 |
| ENSG00000167525 | PROCA1    | protein interacting with cyclin A1                                | 0,5396  | 1,4536 | 0,0002 | 0,0022 |
| ENSG00000162997 | PRORS1P   | prolyl-tRNA synthetase associated domain containing 1, pseudogene | 0,5546  | 1,4688 | 0,0003 | 0,0030 |
| ENSG00000147471 | PROSC     | proline synthetase co-transcribed homolog (bacterial)             | -0,4962 | 0,7090 | 0,0000 | 0,0000 |
| ENSG00000167595 | PROSER3   | proline and serine rich 3                                         | 0,5125  | 1,4265 | 0,0000 | 0,0005 |
| ENSG00000117707 | PROX1     | prospero homeobox 1                                               | 0,8966  | 1,8617 | 0,0000 | 0,0000 |
| ENSG00000230461 | PROX1-AS1 | PROX1 antisense RNA 1                                             | 0,5727  | 1,4873 | 0,0004 | 0,0043 |
| ENSG00000134186 | PRPF38B   | pre-mRNA processing factor 38B                                    | -0,4975 | 0,7083 | 0,0000 | 0,0000 |
| ENSG00000110844 | PRPF40B   | PRP40 homolog, pre-mRNA processing factor B                       | 0,5162  | 1,4301 | 0,0000 | 0,0000 |
| ENSG00000135406 | PRPH      | peripherin                                                        | 0,8300  | 1,7777 | 0,0000 | 0,0002 |
| ENSG00000068489 | PRR11     | proline rich 11                                                   | -0,3969 | 0,7595 | 0,0000 | 0,0005 |
| ENSG00000183248 | PRR36     | proline rich 36                                                   | 0,6527  | 1,5721 | 0,0000 | 0,0006 |
| ENSG00000204469 | PRRC2A    | proline-rich coiled-coil 2A                                       | 0,3841  | 1,3051 | 0,0004 | 0,0044 |
| ENSG00000224940 | PRRT4     | proline-rich transmembrane protein 4                              | 0,9508  | 1,9329 | 0,0001 | 0,0015 |
| ENSG00000112812 | PRSS16    | protease, serine, 16 (thymus)                                     | 0,4882  | 1,4027 | 0,0000 | 0,0003 |
| ENSG00000275896 | PRSS2     | protease, serine, 2 (trypsin 2)                                   | 2,1131  | 4,3263 | 0,0000 | 0,0000 |
| ENSG00000103355 | PRSS33    | protease, serine, 33                                              | 1,2703  | 2,4121 | 0,0000 | 0,0000 |
| ENSG00000052344 | PRSS8     | protease, serine, 8                                               | 1,0239  | 2,0335 | 0,0002 | 0,0023 |
| ENSG00000099256 | PRTFDC1   | phosphoribosyl transferase domain containing 1                    | -0,5884 | 0,6651 | 0,0000 | 0,0001 |
| ENSG00000196415 | PRTN3     | proteinase 3                                                      | 0,9680  | 1,9561 | 0,0004 | 0,0044 |
| ENSG00000106772 | PRUNE2    | prune homolog 2 (Drosophila)                                      | 0,7797  | 1,7168 | 0,0000 | 0,0004 |
| ENSG00000105227 | PRX       | periaxin                                                          | 0,6290  | 1,5465 | 0,0000 | 0,0002 |
| ENSG00000146005 | PSD2      | pleckstrin and Sec7 domain containing 2                           | 1,9523  | 3,8700 | 0,0000 | 0,0000 |
| ENSG00000231924 | PSG1      | pregnancy specific beta-1-glycoprotein 1                          | 1,0987  | 2,1416 | 0,0000 | 0,0000 |
| ENSG00000243130 | PSG11     | pregnancy specific beta-1-glycoprotein 11                         | 1,1239  | 2,1793 | 0,0000 | 0,0000 |
| ENSG00000204941 | PSG5      | pregnancy specific beta-1-glycoprotein 5                          | 1,4477  | 2,7277 | 0,0000 | 0,0000 |
| ENSG00000106588 | PSMA2     | proteasome subunit alpha 2                                        | -0,6132 | 0,6537 | 0,0000 | 0,0000 |
| ENSG00000100567 | PSMA3     | proteasome subunit alpha 3                                        | -0,4880 | 0,7130 | 0,0000 | 0,0000 |
| ENSG00000143106 | PSMA5     | proteasome subunit alpha 5                                        | -0,4596 | 0,7272 | 0,0000 | 0,0001 |
| ENSG00000100764 | PSMC1     | proteasome 26S subunit, ATPase 1                                  | -0,7064 | 0,6128 | 0,0000 | 0,0000 |

|                 |           |                                                                                       |         |        |        |        |
|-----------------|-----------|---------------------------------------------------------------------------------------|---------|--------|--------|--------|
| ENSG00000161057 | PSMC2     | proteasome 26S subunit, ATPase 2                                                      | -0,6962 | 0,6172 | 0,0000 | 0,0000 |
| ENSG00000087191 | PSMC5     | proteasome 26S subunit, ATPase 5                                                      | -0,4379 | 0,7382 | 0,0000 | 0,0001 |
| ENSG00000100519 | PSMC6     | proteasome 26S subunit, ATPase 6                                                      | -0,5877 | 0,6654 | 0,0000 | 0,0000 |
| ENSG00000173692 | PSMD1     | proteasome 26S subunit, non-ATPase 1                                                  | -0,4791 | 0,7174 | 0,0000 | 0,0000 |
| ENSG00000197170 | PSMD12    | proteasome 26S subunit, non-ATPase 12                                                 | -0,4249 | 0,7449 | 0,0000 | 0,0001 |
| ENSG00000115233 | PSMD14    | proteasome 26S subunit, non-ATPase 14                                                 | -0,4157 | 0,7496 | 0,0000 | 0,0001 |
| ENSG00000175166 | PSMD2     | proteasome 26S subunit, non-ATPase 2                                                  | -0,3837 | 0,7665 | 0,0000 | 0,0003 |
| ENSG00000226752 | PSMD5-AS1 | PSMD5 antisense RNA 1 (head to head)                                                  | 0,3906  | 1,3109 | 0,0000 | 0,0005 |
| ENSG00000163636 | PSMD6     | proteasome 26S subunit, non-ATPase 6                                                  | -0,3791 | 0,7689 | 0,0001 | 0,0018 |
| ENSG00000131467 | PSME3     | proteasome activator subunit 3                                                        | -0,4782 | 0,7179 | 0,0000 | 0,0001 |
| ENSG00000230487 | PSMG3-AS1 | PSMG3 antisense RNA 1 (head to head)                                                  | -0,4878 | 0,7131 | 0,0004 | 0,0043 |
| ENSG00000204540 | PSORS1C1  | psoriasis susceptibility 1 candidate 1                                                | 0,5523  | 1,4664 | 0,0000 | 0,0005 |
| ENSG00000121390 | PSPC1     | paraspeckle component 1                                                               | -0,4269 | 0,7439 | 0,0000 | 0,0001 |
| ENSG00000140368 | PSTPIP1   | proline-serine-threonine phosphatase interacting protein 1                            | 1,4427  | 2,7182 | 0,0000 | 0,0000 |
| ENSG00000152229 | PSTPIP2   | proline-serine-threonine phosphatase interacting protein 2                            | -0,8557 | 0,5526 | 0,0000 | 0,0000 |
| ENSG00000156471 | PTDSS1    | phosphatidylserine synthase 1                                                         | -0,6583 | 0,6336 | 0,0000 | 0,0000 |
| ENSG00000165983 | PTER      | phosphotriesterase related                                                            | -0,4491 | 0,7325 | 0,0000 | 0,0001 |
| ENSG00000125384 | PTGER2    | prostaglandin E receptor 2 (subtype EP2), 53kDa                                       | -0,9557 | 0,5156 | 0,0001 | 0,0011 |
| ENSG00000106853 | PTGR1     | prostaglandin reductase 1                                                             | -0,4021 | 0,7567 | 0,0000 | 0,0002 |
| ENSG00000095303 | PTGS1     | prostaglandin-endoperoxide synthase 1 (prostaglandin G/H synthase and cyclooxygenase) | 1,2577  | 2,3912 | 0,0000 | 0,0000 |
| ENSG00000160801 | PTH1R     | parathyroid hormone 1 receptor                                                        | 0,9235  | 1,8968 | 0,0000 | 0,0005 |
| ENSG00000112655 | PTK7      | protein tyrosine kinase 7 (inactive)                                                  | 0,4188  | 1,3368 | 0,0002 | 0,0020 |
| ENSG00000184007 | PTP4A2    | protein tyrosine phosphatase type IVA, member 2                                       | -0,4449 | 0,7347 | 0,0000 | 0,0000 |
| ENSG00000184489 | PTP4A3    | protein tyrosine phosphatase type IVA, member 3                                       | 1,2096  | 2,3128 | 0,0000 | 0,0000 |
| ENSG00000163629 | PTPN13    | protein tyrosine phosphatase, non-receptor type 13 (APO-1/CD95 (Fas)-associated)      | 1,3501  | 2,5493 | 0,0000 | 0,0000 |
| ENSG00000111679 | PTPN6     | protein tyrosine phosphatase, non-receptor type 6                                     | 0,5544  | 1,4685 | 0,0000 | 0,0000 |
| ENSG00000143851 | PTPN7     | protein tyrosine phosphatase, non-receptor type 7                                     | -0,8293 | 0,5628 | 0,0000 | 0,0000 |
| ENSG00000142949 | PTPRF     | protein tyrosine phosphatase, receptor type, F                                        | 0,6399  | 1,5582 | 0,0000 | 0,0000 |
| ENSG00000080031 | PTPRH     | protein tyrosine phosphatase, receptor type, H                                        | 0,7365  | 1,6661 | 0,0000 | 0,0000 |
| ENSG00000155093 | PTPRN2    | protein tyrosine phosphatase, receptor type, N polypeptide 2                          | -0,6162 | 0,6524 | 0,0000 | 0,0000 |
| ENSG00000177469 | PTRF      | polymerase I and transcript release factor                                            | -0,4324 | 0,7410 | 0,0000 | 0,0000 |



|                 |           |                                                     |         |        |        |        |
|-----------------|-----------|-----------------------------------------------------|---------|--------|--------|--------|
| ENSG00000141378 | PTRH2     | peptidyl-tRNA hydrolase 2                           | -0,5669 | 0,6751 | 0,0000 | 0,0000 |
| ENSG00000080608 | PUM3      | pumilio RNA-binding family member 3                 | -0,8936 | 0,5383 | 0,0000 | 0,0000 |
| ENSG00000146676 | PURB      | purine-rich element binding protein B               | -0,5507 | 0,6827 | 0,0000 | 0,0000 |
| ENSG00000177192 | PUS1      | pseudouridylate synthase 1                          | -0,4131 | 0,7510 | 0,0000 | 0,0006 |
| ENSG00000091127 | PUS7      | pseudouridylate synthase 7 (putative)               | -0,6607 | 0,6326 | 0,0000 | 0,0000 |
| ENSG00000129317 | PUS7L     | pseudouridylate synthase 7-like                     | -0,5686 | 0,6743 | 0,0000 | 0,0000 |
| ENSG00000177707 | PVRL3     | poliovirus receptor-related 3                       | -1,2898 | 0,4090 | 0,0000 | 0,0000 |
| ENSG00000136045 | PWP1      | PWP1 homolog, endonuclein                           | -0,3878 | 0,7643 | 0,0000 | 0,0007 |
| ENSG00000130508 | PXDN      | peroxidasin                                         | 1,0600  | 2,0849 | 0,0001 | 0,0014 |
| ENSG00000183010 | PYCR1     | pyrroline-5-carboxylate reductase 1                 | 0,7647  | 1,6990 | 0,0000 | 0,0000 |
| ENSG00000145337 | PYURF     | PIGY upstream reading frame                         | -0,4448 | 0,7347 | 0,0001 | 0,0009 |
| ENSG00000131096 | PYY       | peptide YY                                          | -0,9026 | 0,5349 | 0,0002 | 0,0025 |
| ENSG00000237575 | PYY2      | peptide YY, 2 (pseudogene)                          | -0,8438 | 0,5572 | 0,0003 | 0,0032 |
| ENSG00000112531 | QKI       | QKI, KH domain containing, RNA binding              | -0,8607 | 0,5507 | 0,0000 | 0,0000 |
| ENSG00000103485 | QPRT      | quinolinate phosphoribosyltransferase               | 0,4683  | 1,3834 | 0,0000 | 0,0000 |
| ENSG00000151576 | QTRTD1    | queuine tRNA-ribosyltransferase domain containing 1 | -0,5046 | 0,7048 | 0,0000 | 0,0000 |
| ENSG00000179912 | R3HDM2    | R3H domain containing 2                             | 0,4726  | 1,3876 | 0,0000 | 0,0000 |
| ENSG00000131242 | RAB11FIP4 | RAB11 family interacting protein 4 (class II)       | 0,7664  | 1,7011 | 0,0000 | 0,0000 |
| ENSG00000139832 | RAB20     | RAB20, member RAS oncogene family                   | -0,6547 | 0,6352 | 0,0000 | 0,0000 |
| ENSG00000167964 | RAB26     | RAB26, member RAS oncogene family                   | 1,0868  | 2,1240 | 0,0000 | 0,0000 |
| ENSG00000041353 | RAB27B    | RAB27B, member RAS oncogene family                  | -0,6190 | 0,6511 | 0,0004 | 0,0044 |
| ENSG00000137502 | RAB30     | RAB30, member RAS oncogene family                   | 0,5860  | 1,5010 | 0,0000 | 0,0000 |
| ENSG00000168461 | RAB31     | RAB31, member RAS oncogene family                   | -0,6907 | 0,6196 | 0,0000 | 0,0000 |
| ENSG00000179331 | RAB39A    | RAB39A, member RAS oncogene family                  | -1,1415 | 0,4533 | 0,0000 | 0,0001 |
| ENSG00000155961 | RAB39B    | RAB39B, member RAS oncogene family                  | 0,7648  | 1,6991 | 0,0000 | 0,0000 |
| ENSG00000105649 | RAB3A     | RAB3A, member RAS oncogene family                   | 0,9123  | 1,8821 | 0,0000 | 0,0000 |
| ENSG00000169213 | RAB3B     | RAB3B, member RAS oncogene family                   | -0,4321 | 0,7412 | 0,0000 | 0,0000 |
| ENSG00000197562 | RAB40C    | RAB40C, member RAS oncogene family                  | 0,5417  | 1,4557 | 0,0002 | 0,0020 |
| ENSG00000154917 | RAB6B     | RAB6B, member RAS oncogene family                   | 0,7481  | 1,6796 | 0,0000 | 0,0000 |
| ENSG00000276600 | RAB7B     | RAB7B, member RAS oncogene family                   | 1,4672  | 2,7648 | 0,0000 | 0,0000 |
| ENSG00000136933 | RABEPK    | Rab9 effector protein with kelch motifs             | -0,4912 | 0,7114 | 0,0000 | 0,0001 |

|                 |           |                                                                                     |         |        |        |        |
|-----------------|-----------|-------------------------------------------------------------------------------------|---------|--------|--------|--------|
| ENSG00000137955 | RABGGTB   | Rab geranylgeranyltransferase, beta subunit                                         | -0,4308 | 0,7418 | 0,0000 | 0,0002 |
| ENSG00000144840 | RABL3     | RAB, member of RAS oncogene family-like 3                                           | -0,4118 | 0,7517 | 0,0002 | 0,0026 |
| ENSG00000136238 | RAC1      | ras-related C3 botulinum toxin substrate 1 (rho family, small GTP binding protein R | -0,4734 | 0,7203 | 0,0000 | 0,0000 |
| ENSG00000244588 | RAD21L1   | RAD21 cohesin complex component like 1                                              | -0,6829 | 0,6229 | 0,0003 | 0,0029 |
| ENSG00000245849 | RAD51-AS1 | RAD51 antisense RNA 1 (head to head)                                                | 0,6263  | 1,5436 | 0,0000 | 0,0003 |
| ENSG00000172613 | RAD9A     | RAD9 checkpoint clamp component A                                                   | 0,4004  | 1,3199 | 0,0005 | 0,0055 |
| ENSG00000164520 | RAET1E    | retinoic acid early transcript 1E                                                   | -0,7319 | 0,6021 | 0,0000 | 0,0000 |
| ENSG00000155918 | RAET1L    | retinoic acid early transcript 1L                                                   | 1,2697  | 2,4110 | 0,0000 | 0,0000 |
| ENSG00000039560 | RAI14     | retinoic acid induced 14                                                            | -0,4614 | 0,7263 | 0,0000 | 0,0000 |
| ENSG00000131831 | RAI2      | retinoic acid induced 2                                                             | -0,9965 | 0,5012 | 0,0000 | 0,0000 |
| ENSG00000160271 | RALGDS    | ral guanine nucleotide dissociation stimulator                                      | 0,5886  | 1,5038 | 0,0000 | 0,0000 |
| ENSG00000136828 | RALGPS1   | Ral GEF with PH domain and SH3 binding motif 1                                      | 0,8119  | 1,7555 | 0,0000 | 0,0000 |
| ENSG00000132329 | RAMP1     | receptor (G protein-coupled) activity modifying protein 1                           | 0,5528  | 1,4669 | 0,0010 | 0,0090 |
| ENSG00000132341 | RAN       | RAN, member RAS oncogene family                                                     | -0,5503 | 0,6829 | 0,0000 | 0,0000 |
| ENSG00000137040 | RANBP6    | RAN binding protein 6                                                               | -0,5997 | 0,6599 | 0,0000 | 0,0000 |
| ENSG00000076864 | RAP1GAP   | RAP1 GTPase activating protein                                                      | 1,2025  | 2,3013 | 0,0000 | 0,0000 |
| ENSG00000125249 | RAP2A     | RAP2A, member of RAS oncogene family                                                | -0,7490 | 0,5950 | 0,0000 | 0,0000 |
| ENSG00000181467 | RAP2B     | RAP2B, member of RAS oncogene family                                                | -0,5677 | 0,6747 | 0,0000 | 0,0000 |
| ENSG00000131759 | RARA      | retinoic acid receptor, alpha                                                       | 0,3867  | 1,3074 | 0,0006 | 0,0060 |
| ENSG00000106538 | RARRES2   | retinoic acid receptor responder (tazarotene induced) 2                             | 0,6975  | 1,6217 | 0,0002 | 0,0019 |
| ENSG00000133321 | RARRES3   | retinoic acid receptor responder (tazarotene induced) 3                             | 1,4385  | 2,7104 | 0,0000 | 0,0000 |
| ENSG00000113643 | RARS      | arginyl-tRNA synthetase                                                             | -0,4384 | 0,7379 | 0,0000 | 0,0002 |
| ENSG00000257037 | RARSP1    | arginyl-tRNA synthetase pseudogene 1                                                | 1,1815  | 2,2681 | 0,0000 | 0,0001 |
| ENSG00000185989 | RASA3     | RAS p21 protein activator 3                                                         | -0,9594 | 0,5143 | 0,0000 | 0,0000 |
| ENSG00000111344 | RASAL1    | RAS protein activator like 1 (GAP1 like)                                            | 0,7583  | 1,6915 | 0,0000 | 0,0000 |
| ENSG00000138670 | RASGEF1B  | RasGEF domain family, member 1B                                                     | 0,4628  | 1,3782 | 0,0005 | 0,0049 |
| ENSG00000146090 | RASGEF1C  | RasGEF domain family, member 1C                                                     | 1,2373  | 2,3576 | 0,0000 | 0,0000 |
| ENSG00000058335 | RASGRF1   | Ras protein-specific guanine nucleotide-releasing factor 1                          | 0,4694  | 1,3845 | 0,0000 | 0,0000 |
| ENSG00000152689 | RASGRP3   | RAS guanyl releasing protein 3 (calcium and DAG-regulated)                          | -1,2626 | 0,4168 | 0,0000 | 0,0000 |
| ENSG00000122035 | RASL11A   | RAS-like, family 11, member A                                                       | -1,0533 | 0,4819 | 0,0000 | 0,0000 |
| ENSG00000169435 | RASSF6    | Ras association (RalGDS/AF-6) domain family member 6                                | 1,6425  | 3,1220 | 0,0000 | 0,0000 |

|                 |           |                                                                               |         |        |        |        |
|-----------------|-----------|-------------------------------------------------------------------------------|---------|--------|--------|--------|
| ENSG00000139687 | RB1       | retinoblastoma 1                                                              | -0,5478 | 0,6840 | 0,0000 | 0,0000 |
| ENSG00000125826 | RBCK1     | RanBP-type and C3HC4-type zinc finger containing 1                            | 0,7604  | 1,6939 | 0,0000 | 0,0000 |
| ENSG00000171174 | RBKS      | ribokinase                                                                    | 0,7400  | 1,6701 | 0,0000 | 0,0004 |
| ENSG00000244462 | RBM12     | RNA binding motif protein 12                                                  | -0,3851 | 0,7657 | 0,0000 | 0,0000 |
| ENSG00000119707 | RBM25     | RNA binding motif protein 25                                                  | -0,6288 | 0,6467 | 0,0000 | 0,0000 |
| ENSG00000139746 | RBM26     | RNA binding motif protein 26                                                  | -0,9297 | 0,5250 | 0,0000 | 0,0000 |
| ENSG00000227354 | RBM26-AS1 | RBM26 antisense RNA 1                                                         | -0,6120 | 0,6543 | 0,0009 | 0,0082 |
| ENSG00000184898 | RBM43     | RNA binding motif protein 43                                                  | 0,6417  | 1,5601 | 0,0000 | 0,0003 |
| ENSG00000147274 | RBMX      | RNA binding motif protein, X-linked                                           | -0,4007 | 0,7575 | 0,0000 | 0,0002 |
| ENSG00000166831 | RBPMS2    | RNA binding protein with multiple splicing 2                                  | -0,8808 | 0,5431 | 0,0000 | 0,0000 |
| ENSG00000136161 | RCBTB2    | regulator of chromosome condensation (RCC1) and BTB (POZ) domain containing p | -0,8739 | 0,5457 | 0,0000 | 0,0000 |
| ENSG00000120158 | RCL1      | RNA terminal phosphate cyclase-like 1                                         | -0,5463 | 0,6848 | 0,0000 | 0,0000 |
| ENSG00000049449 | RCN1      | reticulocalbin 1, EF-hand calcium binding domain                              | -0,3878 | 0,7643 | 0,0000 | 0,0002 |
| ENSG00000142552 | RCN3      | reticulocalbin 3, EF-hand calcium binding domain                              | 0,7807  | 1,7179 | 0,0000 | 0,0001 |
| ENSG00000167771 | RCOR2     | REST corepressor 2                                                            | 0,7706  | 1,7059 | 0,0001 | 0,0011 |
| ENSG00000198570 | RD3       | retinal degeneration 3                                                        | 1,4912  | 2,8113 | 0,0000 | 0,0000 |
| ENSG00000240857 | RDH14     | retinol dehydrogenase 14 (all-trans/9-cis/11-cis)                             | -0,4702 | 0,7219 | 0,0000 | 0,0006 |
| ENSG00000278023 | RDM1      | RAD52 motif containing 1                                                      | 0,6223  | 1,5393 | 0,0000 | 0,0001 |
| ENSG00000132563 | REEP2     | receptor accessory protein 2                                                  | 0,7194  | 1,6465 | 0,0000 | 0,0000 |
| ENSG00000142599 | RERE      | arginine-glutamic acid dipeptide (RE) repeats                                 | 0,6450  | 1,5637 | 0,0000 | 0,0000 |
| ENSG00000134533 | RERG      | RAS-like, estrogen-regulated, growth inhibitor                                | 0,8718  | 1,8300 | 0,0008 | 0,0078 |
| ENSG00000133119 | RFC3      | replication factor C (activator 1) 3, 38kDa                                   | -0,6805 | 0,6240 | 0,0000 | 0,0000 |
| ENSG00000132005 | RFX1      | regulatory factor X, 1 (influences HLA class II expression)                   | 0,6926  | 1,6162 | 0,0000 | 0,0000 |
| ENSG00000087903 | RFX2      | regulatory factor X, 2 (influences HLA class II expression)                   | 0,5828  | 1,4977 | 0,0000 | 0,0000 |
| ENSG00000196460 | RFX8      | RFX family member 8, lacking RFX DNA binding domain                           | 0,5060  | 1,4201 | 0,0001 | 0,0012 |
| ENSG00000143344 | RGL1      | ral guanine nucleotide dissociation stimulator-like 1                         | 0,5550  | 1,4692 | 0,0000 | 0,0000 |
| ENSG00000205517 | RGL3      | ral guanine nucleotide dissociation stimulator-like 3                         | 0,5243  | 1,4382 | 0,0002 | 0,0027 |
| ENSG00000182175 | RGMA      | repulsive guidance molecule family member a                                   | 0,8241  | 1,7705 | 0,0003 | 0,0033 |
| ENSG00000076344 | RGS11     | regulator of G-protein signaling 11                                           | 1,8350  | 3,5677 | 0,0000 | 0,0000 |
| ENSG00000159788 | RGS12     | regulator of G-protein signaling 12                                           | 0,5463  | 1,4603 | 0,0000 | 0,0000 |
| ENSG00000138835 | RGS3      | regulator of G-protein signaling 3                                            | 0,5577  | 1,4720 | 0,0000 | 0,0000 |

|                 |           |                                                         |         |        |        |        |
|-----------------|-----------|---------------------------------------------------------|---------|--------|--------|--------|
| ENSG00000005486 | RHBDD2    | rhomboid domain containing 2                            | 0,4418  | 1,3583 | 0,0000 | 0,0002 |
| ENSG00000129667 | RHBDF2    | rhomboid 5 homolog 2 (Drosophila)                       | 0,4954  | 1,4097 | 0,0003 | 0,0032 |
| ENSG00000132677 | RHBG      | Rh family, B glycoprotein (gene/pseudogene)             | 1,7409  | 3,3425 | 0,0000 | 0,0000 |
| ENSG00000143878 | RHOB      | ras homolog family member B                             | -0,6917 | 0,6191 | 0,0000 | 0,0000 |
| ENSG00000072422 | RHOBTB1   | Rho-related BTB domain containing 1                     | 1,4099  | 2,6572 | 0,0000 | 0,0000 |
| ENSG00000119729 | RHOQ      | ras homolog family member Q                             | 0,3914  | 1,3117 | 0,0000 | 0,0001 |
| ENSG00000116574 | RHOU      | ras homolog family member U                             | -1,0161 | 0,4944 | 0,0000 | 0,0000 |
| ENSG00000128408 | RIBC2     | RIB43A domain with coiled-coils 2                       | 0,6668  | 1,5876 | 0,0000 | 0,0000 |
| ENSG00000060709 | RIMBP2    | RIMS binding protein 2                                  | 0,5482  | 1,4623 | 0,0000 | 0,0000 |
| ENSG00000117016 | RIMS3     | regulating synaptic membrane exocytosis 3               | 1,4987  | 2,8259 | 0,0000 | 0,0000 |
| ENSG00000204227 | RING1     | ring finger protein 1                                   | 0,4371  | 1,3539 | 0,0000 | 0,0000 |
| ENSG00000135249 | RINT1     | RAD50 interactor 1                                      | -0,6311 | 0,6457 | 0,0000 | 0,0000 |
| ENSG00000124784 | RIOK1     | RIO kinase 1                                            | -0,4602 | 0,7269 | 0,0000 | 0,0006 |
| ENSG00000058729 | RIOK2     | RIO kinase 2                                            | -0,4121 | 0,7515 | 0,0001 | 0,0010 |
| ENSG00000240250 | RN7SL541P | RNA, 7SL, cytoplasmic 541, pseudogene                   | 0,8617  | 1,8171 | 0,0005 | 0,0054 |
| ENSG00000136104 | RNASEH2B  | ribonuclease H2, subunit B                              | -0,6409 | 0,6413 | 0,0000 | 0,0000 |
| ENSG00000133135 | RNF128    | ring finger protein 128, E3 ubiquitin protein ligase    | 0,8454  | 1,7968 | 0,0000 | 0,0000 |
| ENSG00000110315 | RNF141    | ring finger protein 141                                 | -0,4701 | 0,7219 | 0,0000 | 0,0000 |
| ENSG00000151692 | RNF144A   | ring finger protein 144A                                | -1,8745 | 0,2727 | 0,0000 | 0,0000 |
| ENSG00000168159 | RNF187    | ring finger protein 187                                 | 0,4848  | 1,3994 | 0,0000 | 0,0000 |
| ENSG00000121481 | RNF2      | ring finger protein 2                                   | -0,5078 | 0,7033 | 0,0000 | 0,0001 |
| ENSG00000212864 | RNF208    | ring finger protein 208                                 | 0,9610  | 1,9467 | 0,0000 | 0,0000 |
| ENSG00000178222 | RNF212    | ring finger protein 212                                 | 0,5677  | 1,4821 | 0,0003 | 0,0037 |
| ENSG00000099999 | RNF215    | ring finger protein 215                                 | 0,6936  | 1,6173 | 0,0000 | 0,0000 |
| ENSG00000152193 | RNF219    | ring finger protein 219                                 | -0,9844 | 0,5054 | 0,0000 | 0,0000 |
| ENSG00000237330 | RNF223    | ring finger protein 223                                 | 1,3571  | 2,5618 | 0,0000 | 0,0000 |
| ENSG00000127870 | RNF6      | ring finger protein (C3H2C3 type) 6                     | -0,5500 | 0,6830 | 0,0000 | 0,0000 |
| ENSG00000169855 | ROBO1     | roundabout guidance receptor 1                          | 2,4076  | 5,3059 | 0,0000 | 0,0000 |
| ENSG00000185008 | ROBO2     | roundabout guidance receptor 2                          | 1,5053  | 2,8388 | 0,0000 | 0,0000 |
| ENSG00000134318 | ROCK2     | Rho-associated, coiled-coil containing protein kinase 2 | -0,5566 | 0,6799 | 0,0000 | 0,0000 |
| ENSG00000067836 | ROGDI     | rogdi homolog                                           | 0,6433  | 1,5619 | 0,0000 | 0,0000 |

|                 |                |                                                       |         |        |        |        |
|-----------------|----------------|-------------------------------------------------------|---------|--------|--------|--------|
| ENSG00000125995 | ROMO1          | reactive oxygen species modulator 1                   | 0,4978  | 1,4121 | 0,0000 | 0,0007 |
| ENSG00000185483 | ROR1           | receptor tyrosine kinase-like orphan receptor 1       | -0,9264 | 0,5262 | 0,0000 | 0,0000 |
| ENSG00000069667 | RORA           | RAR-related orphan receptor A                         | 0,4228  | 1,3405 | 0,0000 | 0,0001 |
| ENSG00000143365 | RORC           | RAR-related orphan receptor C                         | 0,6065  | 1,5226 | 0,0001 | 0,0013 |
| ENSG00000088899 | RP5-1187M17.10 | Leucine zipper putative tumor suppressor 3            | 0,9999  | 1,9999 | 0,0000 | 0,0000 |
| ENSG00000197498 | RPF2           | ribosome production factor 2 homolog                  | -0,4588 | 0,7276 | 0,0000 | 0,0002 |
| ENSG00000153574 | RPIA           | ribose 5-phosphate isomerase A                        | -0,4992 | 0,7075 | 0,0000 | 0,0000 |
| ENSG00000213228 | RPL12P38       | ribosomal protein L12 pseudogene 38                   | -0,6264 | 0,6478 | 0,0000 | 0,0000 |
| ENSG00000236509 | RPL21P133      | ribosomal protein L21 pseudogene 133                  | 1,8989  | 3,7292 | 0,0000 | 0,0000 |
| ENSG00000163584 | RPL22L1        | ribosomal protein L22-like 1                          | -0,7076 | 0,6123 | 0,0000 | 0,0000 |
| ENSG00000148688 | RPP30          | ribonuclease P/MRP 30kDa subunit                      | -0,4584 | 0,7278 | 0,0000 | 0,0007 |
| ENSG00000115268 | RPS15          | ribosomal protein S15                                 | 0,5036  | 1,4177 | 0,0000 | 0,0000 |
| ENSG00000233927 | RPS28          | ribosomal protein S28                                 | 0,4138  | 1,3322 | 0,0004 | 0,0042 |
| ENSG00000237432 | RPS7P12        | ribosomal protein S7 pseudogene 12                    | 1,8118  | 3,5107 | 0,0000 | 0,0000 |
| ENSG00000165526 | RPUSD4         | RNA pseudouridylylase domain containing 4             | -0,4409 | 0,7367 | 0,0000 | 0,0001 |
| ENSG00000048392 | RRM2B          | ribonucleotide reductase M2 B (TP53 inducible)        | -0,5776 | 0,6701 | 0,0000 | 0,0000 |
| ENSG00000143303 | RRNAD1         | ribosomal RNA adenine dimethylase domain containing 1 | 0,4157  | 1,3340 | 0,0000 | 0,0004 |
| ENSG00000067533 | RRP15          | ribosomal RNA processing 15 homolog                   | -0,6874 | 0,6210 | 0,0000 | 0,0000 |
| ENSG00000160208 | RRP1B          | ribosomal RNA processing 1B                           | -0,4715 | 0,7212 | 0,0000 | 0,0000 |
| ENSG00000124541 | RRP36          | ribosomal RNA processing 36                           | -0,5120 | 0,7012 | 0,0000 | 0,0000 |
| ENSG00000179041 | RRS1           | ribosome biogenesis regulator homolog                 | -0,8565 | 0,5523 | 0,0000 | 0,0000 |
| ENSG00000171490 | RSL1D1         | ribosomal L1 domain containing 1                      | -0,3827 | 0,7670 | 0,0001 | 0,0019 |
| ENSG00000148484 | RSU1           | Ras suppressor protein 1                              | -0,7312 | 0,6024 | 0,0000 | 0,0000 |
| ENSG00000115310 | RTN4           | reticulin 4                                           | -0,4751 | 0,7194 | 0,0000 | 0,0000 |
| ENSG00000163825 | RTP3           | receptor (chemosensory) transporter protein 3         | 1,3880  | 2,6171 | 0,0000 | 0,0000 |
| ENSG00000020633 | RUNX3          | runt-related transcription factor 3                   | -0,4065 | 0,7544 | 0,0001 | 0,0011 |
| ENSG00000198853 | RUSC2          | RUN and SH3 domain containing 2                       | 0,4261  | 1,3436 | 0,0000 | 0,0006 |
| ENSG00000111832 | RWDD1          | RWD domain containing 1                               | -0,3999 | 0,7579 | 0,0001 | 0,0010 |
| ENSG00000013392 | RWDD2A         | RWD domain containing 2A                              | 0,6111  | 1,5274 | 0,0000 | 0,0000 |
| ENSG00000196218 | RYR1           | ryanodine receptor 1 (skeletal)                       | -0,4764 | 0,7188 | 0,0001 | 0,0012 |
| ENSG00000198626 | RYR2           | ryanodine receptor 2 (cardiac)                        | 0,5438  | 1,4578 | 0,0000 | 0,0000 |

|                 |         |                                                      |         |        |        |        |
|-----------------|---------|------------------------------------------------------|---------|--------|--------|--------|
| ENSG00000189334 | S100A14 | S100 calcium binding protein A14                     | 1,3400  | 2,5315 | 0,0000 | 0,0000 |
| ENSG00000188015 | S100A3  | S100 calcium binding protein A3                      | 0,5804  | 1,4953 | 0,0000 | 0,0000 |
| ENSG00000125910 | S1PR4   | sphingosine-1-phosphate receptor 4                   | 1,0487  | 2,0687 | 0,0001 | 0,0010 |
| ENSG00000180739 | S1PR5   | sphingosine-1-phosphate receptor 5                   | -0,6374 | 0,6429 | 0,0000 | 0,0001 |
| ENSG00000173432 | SAA1    | serum amyloid A1                                     | -1,1029 | 0,4656 | 0,0000 | 0,0000 |
| ENSG00000134339 | SAA2    | serum amyloid A2                                     | -1,2079 | 0,4329 | 0,0000 | 0,0000 |
| ENSG00000148965 | SAA4    | serum amyloid A4, constitutive                       | -0,9179 | 0,5293 | 0,0007 | 0,0072 |
| ENSG00000211456 | SACM1L  | SAC1 suppressor of actin mutations 1-like (yeast)    | -0,3992 | 0,7583 | 0,0000 | 0,0001 |
| ENSG00000151835 | SACS    | sacsin molecular chaperone                           | -0,6013 | 0,6592 | 0,0000 | 0,0000 |
| ENSG00000020577 | SAMD4A  | sterile alpha motif domain containing 4A             | -0,4390 | 0,7376 | 0,0000 | 0,0000 |
| ENSG00000101347 | SAMHD1  | SAM domain and HD domain 1                           | -0,6496 | 0,6375 | 0,0000 | 0,0000 |
| ENSG00000150459 | SAP18   | Sin3A-associated protein, 18kDa                      | -0,3786 | 0,7692 | 0,0001 | 0,0019 |
| ENSG00000164576 | SAP30L  | SAP30-like                                           | -0,5463 | 0,6848 | 0,0000 | 0,0000 |
| ENSG00000123453 | SARDH   | sarcosine dehydrogenase                              | 1,6640  | 3,1689 | 0,0000 | 0,0000 |
| ENSG00000130066 | SAT1    | spermidine/spermine N1-acetyltransferase 1           | 0,3789  | 1,3004 | 0,0000 | 0,0001 |
| ENSG00000182568 | SATB1   | SATB homeobox 1                                      | -1,1964 | 0,4364 | 0,0000 | 0,0000 |
| ENSG00000225648 | SBDSP1  | Shwachman-Bodian-Diamond syndrome pseudogene 1       | -0,5214 | 0,6967 | 0,0000 | 0,0000 |
| ENSG00000188322 | SBK1    | SH3 domain binding kinase 1                          | 0,5902  | 1,5054 | 0,0000 | 0,0000 |
| ENSG00000109929 | SC5D    | sterol-C5-desaturase                                 | -0,5204 | 0,6972 | 0,0000 | 0,0000 |
| ENSG00000214279 | SCART1  | scavenger receptor protein family member             | 0,8959  | 1,8608 | 0,0000 | 0,0003 |
| ENSG00000145284 | SCD5    | stearoyl-CoA desaturase 5                            | -0,7757 | 0,5841 | 0,0000 | 0,0000 |
| ENSG00000184178 | SCFD2   | sec1 family domain containing 2                      | -0,5366 | 0,6894 | 0,0000 | 0,0001 |
| ENSG00000124939 | SCGB2A1 | secretoglobin, family 2A, member 1                   | 2,1269  | 4,3678 | 0,0000 | 0,0000 |
| ENSG00000047634 | SCML1   | sex comb on midleg-like 1 (Drosophila)               | -0,3942 | 0,7609 | 0,0000 | 0,0004 |
| ENSG00000007314 | SCN4A   | sodium channel, voltage gated, type IV alpha subunit | 1,2948  | 2,4535 | 0,0000 | 0,0000 |
| ENSG00000183873 | SCN5A   | sodium channel, voltage gated, type V alpha subunit  | 1,2196  | 2,3288 | 0,0000 | 0,0000 |
| ENSG00000111319 | SCNN1A  | sodium channel, non voltage gated 1 alpha subunit    | -0,6156 | 0,6526 | 0,0000 | 0,0000 |
| ENSG00000162572 | SCNN1D  | sodium channel, non voltage gated 1 delta subunit    | 0,7248  | 1,6527 | 0,0003 | 0,0038 |
| ENSG00000141295 | SCRN2   | secernin 2                                           | 0,4142  | 1,3325 | 0,0006 | 0,0061 |
| ENSG00000198301 | SDAD1   | SDA1 domain containing 1                             | -0,4589 | 0,7275 | 0,0000 | 0,0001 |
| ENSG00000124145 | SDC4    | syndecan 4                                           | -0,8398 | 0,5587 | 0,0000 | 0,0000 |

|                 |            |                                                                                                                            |         |        |        |        |
|-----------------|------------|----------------------------------------------------------------------------------------------------------------------------|---------|--------|--------|--------|
| ENSG00000137575 | SDCBP      | syndecan binding protein (syntenin)                                                                                        | -0,4766 | 0,7187 | 0,0000 | 0,0000 |
| ENSG00000154079 | SDHAF4     | succinate dehydrogenase complex assembly factor 4                                                                          | 0,4828  | 1,3975 | 0,0001 | 0,0015 |
| ENSG00000069188 | SDK2       | sidekick cell adhesion molecule 2                                                                                          | 0,9580  | 1,9427 | 0,0002 | 0,0022 |
| ENSG00000214491 | SEC14L6    | SEC14-like lipid binding 6                                                                                                 | 0,4038  | 1,3230 | 0,0006 | 0,0058 |
| ENSG00000008952 | SEC62      | SEC62 homolog, preprotein translocation factor                                                                             | -0,3856 | 0,7655 | 0,0000 | 0,0001 |
| ENSG00000141574 | SECTM1     | secreted and transmembrane 1                                                                                               | 0,5773  | 1,4921 | 0,0000 | 0,0007 |
| ENSG00000085415 | SEH1L      | SEH1-like nucleoporin                                                                                                      | -0,6409 | 0,6413 | 0,0000 | 0,0000 |
| ENSG00000143416 | SELENBP1   | selenium binding protein 1                                                                                                 | 0,7012  | 1,6259 | 0,0000 | 0,0000 |
| ENSG00000110876 | SELPLG     | selectin P ligand                                                                                                          | 0,5110  | 1,4250 | 0,0001 | 0,0009 |
| ENSG00000075213 | SEMA3A     | sema domain, immunoglobulin domain (Ig), short basic domain, secreted, (semaphorin)                                        | 1,2613  | 2,3972 | 0,0000 | 0,0000 |
| ENSG00000012171 | SEMA3B     | sema domain, immunoglobulin domain (Ig), short basic domain, secreted, (semaphorin)                                        | 0,5895  | 1,5048 | 0,0000 | 0,0001 |
| ENSG00000232352 | SEMA3B-AS1 | SEMA3B antisense RNA 1 (head to head)                                                                                      | 0,8775  | 1,8372 | 0,0009 | 0,0082 |
| ENSG00000001617 | SEMA3F     | sema domain, immunoglobulin domain (Ig), short basic domain, secreted, (semaphorin)                                        | 0,8080  | 1,7507 | 0,0000 | 0,0000 |
| ENSG00000185033 | SEMA4B     | sema domain, immunoglobulin domain (Ig), transmembrane domain (TM) and short cytoplasmic domain                            | 0,5035  | 1,4176 | 0,0000 | 0,0003 |
| ENSG00000095539 | SEMA4G     | sema domain, immunoglobulin domain (Ig), transmembrane domain (TM) and short cytoplasmic domain                            | 1,2970  | 2,4571 | 0,0000 | 0,0000 |
| ENSG00000112902 | SEMA5A     | sema domain, seven thrombospondin repeats (type 1 and type 1-like), transmembrane domain (TM) and short cytoplasmic domain | -0,8828 | 0,5423 | 0,0005 | 0,0054 |
| ENSG00000092421 | SEMA6A     | sema domain, transmembrane domain (TM), and cytoplasmic domain, (semaphorin)                                               | 0,9629  | 1,9492 | 0,0004 | 0,0039 |
| ENSG00000143434 | SEMA6C     | sema domain, transmembrane domain (TM), and cytoplasmic domain, (semaphorin)                                               | 0,9371  | 1,9147 | 0,0000 | 0,0005 |
| ENSG00000166192 | SENP8      | SUMO/sentrin peptidase family member, NEDD8 specific                                                                       | 0,5719  | 1,4865 | 0,0010 | 0,0093 |
| ENSG00000162430 | SEPN1      | selenoprotein N, 1                                                                                                         | 0,6222  | 1,5392 | 0,0000 | 0,0000 |
| ENSG00000180096 | SEPT1      | septin 1                                                                                                                   | 0,7636  | 1,6977 | 0,0008 | 0,0077 |
| ENSG00000186522 | SEPT10     | septin 10                                                                                                                  | -0,4755 | 0,7192 | 0,0000 | 0,0000 |
| ENSG00000138758 | SEPT11     | septin 11                                                                                                                  | -0,5407 | 0,6875 | 0,0000 | 0,0000 |
| ENSG00000108387 | SEPT4      | septin 4                                                                                                                   | 0,6718  | 1,5931 | 0,0000 | 0,0000 |
| ENSG00000122545 | SEPT7      | septin 7                                                                                                                   | -0,4477 | 0,7332 | 0,0000 | 0,0000 |
| ENSG00000164300 | SERINC5    | serine incorporator 5                                                                                                      | 0,4230  | 1,3407 | 0,0000 | 0,0000 |
| ENSG00000151778 | SERP2      | stress-associated endoplasmic reticulum protein family member 2                                                            | -2,2973 | 0,2034 | 0,0000 | 0,0000 |
| ENSG00000206075 | SERPINB5   | serpin peptidase inhibitor, clade B (ovalbumin), member 5                                                                  | -1,0648 | 0,4780 | 0,0000 | 0,0000 |
| ENSG00000166401 | SERPINB8   | serpin peptidase inhibitor, clade B (ovalbumin), member 8                                                                  | -0,7528 | 0,5934 | 0,0000 | 0,0000 |
| ENSG00000170542 | SERPINB9   | serpin peptidase inhibitor, clade B (ovalbumin), member 9                                                                  | -0,7510 | 0,5942 | 0,0000 | 0,0000 |
| ENSG00000106366 | SERPINE1   | serpin peptidase inhibitor, clade E (nexin, plasminogen activator inhibitor type 1), member 1                              | 0,6750  | 1,5966 | 0,0000 | 0,0000 |

|                 |              |                                                                                        |         |        |        |        |
|-----------------|--------------|----------------------------------------------------------------------------------------|---------|--------|--------|--------|
| ENSG00000135919 | SERPINE2     | serpin peptidase inhibitor, clade E (nexin, plasminogen activator inhibitor type 1), r | -0,3922 | 0,7620 | 0,0008 | 0,0074 |
| ENSG00000149257 | SERPINH1     | serpin peptidase inhibitor, clade H (heat shock protein 47), member 1, (collagen bin   | -0,5319 | 0,6916 | 0,0000 | 0,0000 |
| ENSG00000163536 | SERPIN1      | serpin peptidase inhibitor, clade I (neuroserpin), member 1                            | 0,8199  | 1,7653 | 0,0000 | 0,0000 |
| ENSG00000130766 | SESN2        | sestrin 2                                                                              | 0,7974  | 1,7379 | 0,0000 | 0,0000 |
| ENSG00000149212 | SESN3        | sestrin 3                                                                              | 0,6504  | 1,5696 | 0,0000 | 0,0000 |
| ENSG00000187231 | SESTD1       | SEC14 and spectrin domains 1                                                           | 0,5205  | 1,4344 | 0,0001 | 0,0015 |
| ENSG00000119335 | SET          | SET nuclear proto-oncogene                                                             | -0,4840 | 0,7150 | 0,0000 | 0,0000 |
| ENSG00000183576 | SETD3        | SET domain containing 3                                                                | -0,5508 | 0,6826 | 0,0000 | 0,0000 |
| ENSG00000136169 | SETDB2       | SET domain, bifurcated 2                                                               | -0,4953 | 0,7094 | 0,0000 | 0,0000 |
| ENSG00000170364 | SETMAR       | SET domain and mariner transposase fusion gene                                         | -0,5646 | 0,6761 | 0,0001 | 0,0011 |
| ENSG00000174938 | SEZ6L2       | seizure related 6 homolog (mouse)-like 2                                               | 0,4269  | 1,3443 | 0,0005 | 0,0050 |
| ENSG00000183431 | SF3A3        | splicing factor 3a, subunit 3, 60kDa                                                   | -0,4821 | 0,7159 | 0,0000 | 0,0001 |
| ENSG00000198089 | SFI1         | SFI1 centrin binding protein                                                           | 0,5395  | 1,4535 | 0,0000 | 0,0000 |
| ENSG00000116560 | SFPQ         | splicing factor proline/glutamine-rich                                                 | -0,5679 | 0,6746 | 0,0000 | 0,0000 |
| ENSG00000107819 | SFXN3        | sideroflexin 3                                                                         | 0,6170  | 1,5337 | 0,0000 | 0,0000 |
| ENSG00000226200 | SGMS1-AS1    | SGMS1 antisense RNA 1                                                                  | 0,4800  | 1,3948 | 0,0007 | 0,0068 |
| ENSG00000164023 | SGMS2        | sphingomyelin synthase 2                                                               | -0,4655 | 0,7242 | 0,0000 | 0,0000 |
| ENSG00000163535 | SGOL2        | shugoshin-like 2 (S. pombe)                                                            | -0,4662 | 0,7239 | 0,0000 | 0,0000 |
| ENSG00000163082 | SGPP2        | sphingosine-1-phosphate phosphatase 2                                                  | -2,3119 | 0,2014 | 0,0000 | 0,0000 |
| ENSG00000167037 | SGSM1        | small G protein signaling modulator 1                                                  | 0,9522  | 1,9349 | 0,0002 | 0,0026 |
| ENSG00000141258 | SGSM2        | small G protein signaling modulator 2                                                  | 0,4339  | 1,3509 | 0,0002 | 0,0026 |
| ENSG00000100359 | SGSM3        | small G protein signaling modulator 3                                                  | 0,4666  | 1,3819 | 0,0001 | 0,0015 |
| ENSG00000027869 | SH2D2A       | SH2 domain containing 2A                                                               | 0,5645  | 1,4788 | 0,0005 | 0,0051 |
| ENSG00000189410 | SH2D5        | SH2 domain containing 5                                                                | -0,5635 | 0,6766 | 0,0000 | 0,0000 |
| ENSG00000214193 | SH3D21       | SH3 domain containing 21                                                               | 1,0205  | 2,0286 | 0,0000 | 0,0000 |
| ENSG00000141985 | SH3GL1       | SH3-domain GRB2-like 1                                                                 | 0,4473  | 1,3635 | 0,0005 | 0,0056 |
| ENSG00000280693 | SH3PXD2A-AS1 | SH3PXD2A antisense RNA 1                                                               | -0,5761 | 0,6708 | 0,0000 | 0,0000 |
| ENSG00000154447 | SH3RF1       | SH3 domain containing ring finger 1                                                    | -0,8140 | 0,5688 | 0,0000 | 0,0000 |
| ENSG00000035115 | SH3YL1       | SH3 and SYLF domain containing 1                                                       | -0,5420 | 0,6868 | 0,0000 | 0,0000 |
| ENSG00000164690 | SHH          | sonic hedgehog                                                                         | -1,7918 | 0,2888 | 0,0000 | 0,0000 |
| ENSG00000180730 | SHISA2       | shisa family member 2                                                                  | -0,8991 | 0,5362 | 0,0000 | 0,0002 |



|                 |          |                                                                                        |         |        |        |        |
|-----------------|----------|----------------------------------------------------------------------------------------|---------|--------|--------|--------|
| ENSG00000198892 | SHISA4   | shisa family member 4                                                                  | 0,8947  | 1,8592 | 0,0000 | 0,0000 |
| ENSG00000182199 | SHMT2    | serine hydroxymethyltransferase 2 (mitochondrial)                                      | 0,4865  | 1,4010 | 0,0000 | 0,0000 |
| ENSG00000144736 | SHQ1     | SHQ1, H/ACA ribonucleoprotein assembly factor                                          | -0,4279 | 0,7434 | 0,0001 | 0,0019 |
| ENSG00000164403 | SHROOM1  | shroom family member 1                                                                 | 0,4315  | 1,3486 | 0,0000 | 0,0004 |
| ENSG00000149577 | SIDT2    | SID1 transmembrane family, member 2                                                    | 0,5331  | 1,4470 | 0,0000 | 0,0000 |
| ENSG00000120725 | SIL1     | SIL1 nucleotide exchange factor                                                        | 0,7176  | 1,6445 | 0,0000 | 0,0000 |
| ENSG00000213445 | SIPA1    | signal-induced proliferation-associated 1                                              | 0,5252  | 1,4392 | 0,0000 | 0,0001 |
| ENSG00000124523 | SIRT5    | sirtuin 5                                                                              | 0,4579  | 1,3735 | 0,0000 | 0,0001 |
| ENSG00000177045 | SIX5     | SIX homeobox 5                                                                         | 0,7600  | 1,6935 | 0,0000 | 0,0000 |
| ENSG00000165480 | SKA3     | spindle and kinetochore associated complex subunit 3                                   | -0,8872 | 0,5407 | 0,0000 | 0,0000 |
| ENSG00000180592 | SKIDA1   | SKI/DACH domain containing 1                                                           | -0,8583 | 0,5516 | 0,0000 | 0,0003 |
| ENSG00000155926 | SLA      | Src-like-adaptor                                                                       | 0,8720  | 1,8302 | 0,0000 | 0,0000 |
| ENSG00000139737 | SLAIN1   | SLAIN motif family, member 1                                                           | -1,3797 | 0,3843 | 0,0000 | 0,0000 |
| ENSG00000064651 | SLC12A2  | solute carrier family 12 (sodium/potassium/chloride transporter), member 2             | -0,4062 | 0,7546 | 0,0000 | 0,0000 |
| ENSG00000140199 | SLC12A6  | solute carrier family 12 (potassium/chloride transporter), member 6                    | 0,4062  | 1,3252 | 0,0001 | 0,0016 |
| ENSG00000113504 | SLC12A7  | solute carrier family 12 (potassium/chloride transporter), member 7                    | 0,5606  | 1,4749 | 0,0000 | 0,0001 |
| ENSG00000146828 | SLC12A9  | solute carrier family 12, member 9                                                     | -0,4061 | 0,7546 | 0,0009 | 0,0087 |
| ENSG00000088386 | SLC15A1  | solute carrier family 15 (oligopeptide transporter), member 1                          | -1,4470 | 0,3668 | 0,0000 | 0,0000 |
| ENSG00000155380 | SLC16A1  | solute carrier family 16 (monocarboxylate transporter), member 1                       | -0,6478 | 0,6383 | 0,0000 | 0,0000 |
| ENSG00000174327 | SLC16A13 | solute carrier family 16, member 13                                                    | 0,4911  | 1,4055 | 0,0002 | 0,0028 |
| ENSG00000147100 | SLC16A2  | solute carrier family 16, member 2 (thyroid hormone transporter)                       | -1,2278 | 0,4270 | 0,0000 | 0,0000 |
| ENSG00000168679 | SLC16A4  | solute carrier family 16, member 4                                                     | 1,1850  | 2,2736 | 0,0000 | 0,0000 |
| ENSG00000165449 | SLC16A9  | solute carrier family 16, member 9                                                     | -1,0038 | 0,4987 | 0,0000 | 0,0000 |
| ENSG00000104888 | SLC17A7  | solute carrier family 17 (vesicular glutamate transporter), member 7                   | 1,0197  | 2,0274 | 0,0000 | 0,0000 |
| ENSG00000106688 | SLC1A1   | solute carrier family 1 (neuronal/epithelial high affinity glutamate transporter, syst | -0,5432 | 0,6862 | 0,0003 | 0,0038 |
| ENSG00000110436 | SLC1A2   | solute carrier family 1 (glial high affinity glutamate transporter), member 2          | 0,7361  | 1,6657 | 0,0000 | 0,0000 |
| ENSG00000144136 | SLC20A1  | solute carrier family 20 (phosphate transporter), member 1                             | -0,5321 | 0,6915 | 0,0000 | 0,0000 |
| ENSG00000110628 | SLC22A18 | solute carrier family 22, member 18                                                    | 0,8527  | 1,8059 | 0,0000 | 0,0000 |
| ENSG00000197847 | SLC22A20 | solute carrier family 22, member 20                                                    | 0,6809  | 1,6031 | 0,0002 | 0,0027 |
| ENSG00000137266 | SLC22A23 | solute carrier family 22, member 23                                                    | 0,6064  | 1,5224 | 0,0000 | 0,0000 |
| ENSG00000183048 | SLC25A10 | solute carrier family 25 (mitochondrial carrier; dicarboxylate transporter), member    | 0,4479  | 1,3640 | 0,0002 | 0,0026 |

|                 |              |                                                                                   |         |        |        |        |
|-----------------|--------------|-----------------------------------------------------------------------------------|---------|--------|--------|--------|
| ENSG0000004864  | SLC25A13     | solute carrier family 25 (aspartate/glutamate carrier), member 13                 | -0,4264 | 0,7441 | 0,0000 | 0,0001 |
| ENSG00000102743 | SLC25A15     | solute carrier family 25 (mitochondrial carrier; ornithine transporter) member 15 | -0,5112 | 0,7017 | 0,0000 | 0,0000 |
| ENSG00000178537 | SLC25A20     | solute carrier family 25 (carnitine/acylcarnitine translocase), member 20         | -0,6115 | 0,6545 | 0,0000 | 0,0002 |
| ENSG00000085491 | SLC25A24     | solute carrier family 25 (mitochondrial carrier; phosphate carrier), member 24    | -0,5126 | 0,7009 | 0,0000 | 0,0000 |
| ENSG00000234771 | SLC25A25-AS1 | SLC25A25 antisense RNA 1                                                          | -0,7033 | 0,6142 | 0,0000 | 0,0000 |
| ENSG00000153291 | SLC25A27     | solute carrier family 25, member 27                                               | 0,6789  | 1,6009 | 0,0000 | 0,0000 |
| ENSG00000075415 | SLC25A3      | solute carrier family 25 (mitochondrial carrier; phosphate carrier), member 3     | -0,3907 | 0,7628 | 0,0001 | 0,0016 |
| ENSG00000164933 | SLC25A32     | solute carrier family 25 (mitochondrial folate carrier), member 32                | -0,6018 | 0,6589 | 0,0000 | 0,0000 |
| ENSG00000171612 | SLC25A33     | solute carrier family 25 (pyrimidine nucleotide carrier), member 33               | -0,4319 | 0,7413 | 0,0002 | 0,0028 |
| ENSG00000125434 | SLC25A35     | solute carrier family 25, member 35                                               | 0,4955  | 1,4098 | 0,0001 | 0,0011 |
| ENSG00000147454 | SLC25A37     | solute carrier family 25 (mitochondrial iron transporter), member 37              | -0,5537 | 0,6813 | 0,0000 | 0,0000 |
| ENSG00000181035 | SLC25A42     | solute carrier family 25, member 42                                               | 0,8657  | 1,8222 | 0,0000 | 0,0000 |
| ENSG00000174502 | SLC26A9      | solute carrier family 26 (anion exchanger), member 9                              | 0,6652  | 1,5858 | 0,0002 | 0,0021 |
| ENSG00000130304 | SLC27A1      | solute carrier family 27 (fatty acid transporter), member 1                       | 0,5450  | 1,4591 | 0,0000 | 0,0001 |
| ENSG00000140284 | SLC27A2      | solute carrier family 27 (fatty acid transporter), member 2                       | -0,3881 | 0,7641 | 0,0004 | 0,0048 |
| ENSG00000164638 | SLC29A4      | solute carrier family 29 (equilibrative nucleoside transporter), member 4         | 0,8735  | 1,8321 | 0,0000 | 0,0000 |
| ENSG00000197496 | SLC2A10      | solute carrier family 2 (facilitated glucose transporter), member 10              | 0,5222  | 1,4361 | 0,0000 | 0,0000 |
| ENSG00000133460 | SLC2A11      | solute carrier family 2 (facilitated glucose transporter), member 11              | 0,4414  | 1,3579 | 0,0002 | 0,0022 |
| ENSG00000146411 | SLC2A12      | solute carrier family 2 (facilitated glucose transporter), member 12              | 0,7185  | 1,6455 | 0,0000 | 0,0000 |
| ENSG00000173262 | SLC2A14      | solute carrier family 2 (facilitated glucose transporter), member 14              | 0,5404  | 1,4544 | 0,0002 | 0,0023 |
| ENSG00000131183 | SLC34A1      | solute carrier family 34 (type II sodium/phosphate cotransporter), member 1       | -1,0747 | 0,4748 | 0,0000 | 0,0000 |
| ENSG00000181830 | SLC35C1      | solute carrier family 35 (GDP-fucose transporter), member C1                      | -0,4680 | 0,7230 | 0,0000 | 0,0001 |
| ENSG00000080189 | SLC35C2      | solute carrier family 35 (GDP-fucose transporter), member C2                      | 0,6055  | 1,5215 | 0,0000 | 0,0000 |
| ENSG00000110660 | SLC35F2      | solute carrier family 35, member F2                                               | -0,6980 | 0,6164 | 0,0000 | 0,0000 |
| ENSG00000111371 | SLC38A1      | solute carrier family 38, member 1                                                | -0,4260 | 0,7443 | 0,0000 | 0,0000 |
| ENSG00000017483 | SLC38A5      | solute carrier family 38, member 5                                                | -0,4429 | 0,7357 | 0,0000 | 0,0000 |
| ENSG00000139974 | SLC38A6      | solute carrier family 38, member 6                                                | -0,5602 | 0,6782 | 0,0000 | 0,0000 |
| ENSG00000196950 | SLC39A10     | solute carrier family 39 (zinc transporter), member 10                            | -0,4146 | 0,7502 | 0,0000 | 0,0000 |
| ENSG00000138821 | SLC39A8      | solute carrier family 39 (zinc transporter), member 8                             | -0,4899 | 0,7121 | 0,0000 | 0,0000 |
| ENSG00000029364 | SLC39A9      | solute carrier family 39, member 9                                                | -0,3968 | 0,7595 | 0,0000 | 0,0000 |
| ENSG00000149150 | SLC43A1      | solute carrier family 43 (amino acid system L transporter), member 1              | 0,3892  | 1,3097 | 0,0000 | 0,0004 |

|                 |         |                                                                                       |         |        |        |        |
|-----------------|---------|---------------------------------------------------------------------------------------|---------|--------|--------|--------|
| ENSG00000162426 | SLC45A1 | solute carrier family 45, member 1                                                    | 1,1983  | 2,2947 | 0,0000 | 0,0000 |
| ENSG00000076351 | SLC46A1 | solute carrier family 46 (folate transporter), member 1                               | -0,3788 | 0,7691 | 0,0000 | 0,0003 |
| ENSG00000142494 | SLC47A1 | solute carrier family 47 (multidrug and toxin extrusion), member 1                    | -0,7900 | 0,5783 | 0,0001 | 0,0012 |
| ENSG00000100170 | SLC5A1  | solute carrier family 5 (sodium/glucose cotransporter), member 1                      | 0,7920  | 1,7315 | 0,0000 | 0,0000 |
| ENSG00000196517 | SLC6A9  | solute carrier family 6 (neurotransmitter transporter, glycine), member 9             | 1,5431  | 2,9141 | 0,0000 | 0,0000 |
| ENSG00000151012 | SLC7A11 | solute carrier family 7 (anionic amino acid transporter light chain, xc- system), mem | 0,8578  | 1,8123 | 0,0000 | 0,0000 |
| ENSG00000099960 | SLC7A4  | solute carrier family 7, member 4                                                     | 0,8644  | 1,8206 | 0,0001 | 0,0013 |
| ENSG00000103064 | SLC7A6  | solute carrier family 7 (amino acid transporter light chain, y+L system), member 6    | -0,6956 | 0,6174 | 0,0000 | 0,0000 |
| ENSG00000155465 | SLC7A7  | solute carrier family 7 (amino acid transporter light chain, y+L system), member 7    | -0,4812 | 0,7164 | 0,0000 | 0,0000 |
| ENSG00000205045 | SLFN12L | schlafen family member 12-like                                                        | -0,6896 | 0,6200 | 0,0002 | 0,0027 |
| ENSG00000188827 | SLX4    | SLX4 structure-specific endonuclease subunit                                          | 0,5366  | 1,4506 | 0,0000 | 0,0000 |
| ENSG00000170545 | SMAGP   | small cell adhesion glycoprotein                                                      | -0,6493 | 0,6376 | 0,0000 | 0,0000 |
| ENSG00000102038 | SMARCA1 | SWI/SNF related, matrix associated, actin dependent regulator of chromatin, subfa     | -0,6067 | 0,6567 | 0,0000 | 0,0000 |
| ENSG00000113810 | SMC4    | structural maintenance of chromosomes 4                                               | -0,3791 | 0,7689 | 0,0000 | 0,0001 |
| ENSG00000165935 | SMCO2   | single-pass membrane protein with coiled-coil domains 2                               | 1,1394  | 2,2029 | 0,0000 | 0,0000 |
| ENSG00000235169 | SMIM1   | small integral membrane protein 1 (Vel blood group)                                   | 1,6231  | 3,0804 | 0,0000 | 0,0000 |
| ENSG00000163683 | SMIM14  | small integral membrane protein 14                                                    | 0,9145  | 1,8850 | 0,0000 | 0,0000 |
| ENSG00000188725 | SMIM15  | small integral membrane protein 15                                                    | -0,4516 | 0,7313 | 0,0000 | 0,0001 |
| ENSG00000267795 | SMIM22  | small integral membrane protein 22                                                    | 0,4366  | 1,3534 | 0,0007 | 0,0068 |
| ENSG00000128602 | SMO     | smoothened, frizzled class receptor                                                   | -0,5551 | 0,6806 | 0,0004 | 0,0047 |
| ENSG00000103056 | SMPD3   | sphingomyelin phosphodiesterase 3, neutral membrane (neutral sphingomyelinase         | 1,5645  | 2,9578 | 0,0000 | 0,0000 |
| ENSG00000130768 | SMPDL3B | sphingomyelin phosphodiesterase, acid-like 3B                                         | -0,5308 | 0,6922 | 0,0001 | 0,0011 |
| ENSG00000108854 | SMURF2  | SMAD specific E3 ubiquitin protein ligase 2                                           | -0,4238 | 0,7454 | 0,0000 | 0,0000 |
| ENSG00000185420 | SMYD3   | SET and MYND domain containing 3                                                      | 0,5345  | 1,4485 | 0,0000 | 0,0000 |
| ENSG00000124216 | SNAI1   | snail family zinc finger 1                                                            | 0,4404  | 1,3569 | 0,0007 | 0,0067 |
| ENSG00000185669 | SNAI3   | snail family zinc finger 3                                                            | 1,0756  | 2,1077 | 0,0000 | 0,0002 |
| ENSG00000174446 | SNAPC5  | small nuclear RNA activating complex, polypeptide 5, 19kDa                            | 0,5543  | 1,4685 | 0,0000 | 0,0000 |
| ENSG00000173267 | SNCG    | synuclein, gamma (breast cancer-specific protein 1)                                   | 1,1340  | 2,1947 | 0,0000 | 0,0000 |
| ENSG00000247092 | SNHG10  | small nucleolar RNA host gene 10                                                      | -0,8594 | 0,5512 | 0,0000 | 0,0000 |
| ENSG00000163597 | SNHG16  | small nucleolar RNA host gene 16                                                      | -0,5243 | 0,6953 | 0,0000 | 0,0000 |
| ENSG00000260260 | SNHG19  | small nucleolar RNA host gene 19                                                      | -0,6730 | 0,6272 | 0,0000 | 0,0000 |

|                 |          |                                                                                 |         |        |        |        |
|-----------------|----------|---------------------------------------------------------------------------------|---------|--------|--------|--------|
| ENSG00000234912 | SNHG20   | small nucleolar RNA host gene 20                                                | -0,4962 | 0,7090 | 0,0000 | 0,0006 |
| ENSG00000242125 | SNHG3    | small nucleolar RNA host gene 3                                                 | -0,5998 | 0,6598 | 0,0000 | 0,0000 |
| ENSG00000281398 | SNHG4    | small nucleolar RNA host gene 4                                                 | -0,8366 | 0,5600 | 0,0000 | 0,0000 |
| ENSG00000245910 | SNHG6    | small nucleolar RNA host gene 6                                                 | 0,6370  | 1,5551 | 0,0000 | 0,0000 |
| ENSG00000131876 | SNRPA1   | small nuclear ribonucleoprotein polypeptide A'                                  | -0,4641 | 0,7249 | 0,0000 | 0,0000 |
| ENSG00000167088 | SNRPD1   | small nuclear ribonucleoprotein D1 polypeptide 16kDa                            | -0,4061 | 0,7547 | 0,0001 | 0,0009 |
| ENSG00000101400 | SNTA1    | syntrophin, alpha 1                                                             | 0,5347  | 1,4486 | 0,0000 | 0,0002 |
| ENSG00000172164 | SNTB1    | syntrophin, beta 1 (dystrophin-associated protein A1, 59kDa, basic component 1) | 0,3801  | 1,3015 | 0,0000 | 0,0001 |
| ENSG00000168807 | SNTB2    | syntrophin, beta 2 (dystrophin-associated protein A1, 59kDa, basic component 2) | -0,3986 | 0,7586 | 0,0000 | 0,0000 |
| ENSG00000173548 | SNX33    | sorting nexin 33                                                                | 0,4403  | 1,3569 | 0,0000 | 0,0001 |
| ENSG00000162627 | SNX7     | sorting nexin 7                                                                 | -0,5617 | 0,6775 | 0,0000 | 0,0001 |
| ENSG00000057252 | SOAT1    | sterol O-acyltransferase 1                                                      | -0,4343 | 0,7401 | 0,0000 | 0,0001 |
| ENSG00000120833 | SOCS2    | suppressor of cytokine signaling 2                                              | -0,6502 | 0,6372 | 0,0000 | 0,0000 |
| ENSG00000171150 | SOCS5    | suppressor of cytokine signaling 5                                              | -0,3940 | 0,7610 | 0,0000 | 0,0004 |
| ENSG00000154556 | SORBS2   | sorbin and SH3 domain containing 2                                              | 0,5584  | 1,4726 | 0,0000 | 0,0000 |
| ENSG00000184985 | SORCS2   | sortilin-related VPS10 domain containing receptor 2                             | 0,5992  | 1,5149 | 0,0000 | 0,0005 |
| ENSG00000137642 | SORL1    | sortilin-related receptor, L(DLR class) A repeats containing                    | 0,5659  | 1,4803 | 0,0000 | 0,0000 |
| ENSG00000198142 | SOWAHC   | sosondowah ankyrin repeat domain family member C                                | -0,6061 | 0,6570 | 0,0000 | 0,0000 |
| ENSG00000187808 | SOWAHD   | sosondowah ankyrin repeat domain family member D                                | 0,9898  | 1,9859 | 0,0001 | 0,0009 |
| ENSG00000177732 | SOX12    | SRY (sex determining region Y)-box 12                                           | 0,5012  | 1,4154 | 0,0000 | 0,0000 |
| ENSG00000168875 | SOX14    | SRY (sex determining region Y)-box 14                                           | 1,0568  | 2,0803 | 0,0000 | 0,0004 |
| ENSG00000181449 | SOX2     | SRY (sex determining region Y)-box 2                                            | -0,6242 | 0,6488 | 0,0001 | 0,0014 |
| ENSG00000061656 | SPAG4    | sperm associated antigen 4                                                      | 0,9060  | 1,8739 | 0,0000 | 0,0000 |
| ENSG00000227234 | SPANXB1  | SPANX family, member B1                                                         | -0,8948 | 0,5378 | 0,0004 | 0,0044 |
| ENSG00000113140 | SPARC    | secreted protein, acidic, cysteine-rich (osteonectin)                           | -1,3882 | 0,3820 | 0,0000 | 0,0000 |
| ENSG00000186451 | SPATA12  | spermatogenesis associated 12                                                   | 0,7167  | 1,6434 | 0,0000 | 0,0005 |
| ENSG00000182957 | SPATA13  | spermatogenesis associated 13                                                   | -0,5372 | 0,6891 | 0,0000 | 0,0000 |
| ENSG00000006282 | SPATA20  | spermatogenesis associated 20                                                   | 0,4913  | 1,4057 | 0,0000 | 0,0000 |
| ENSG00000171763 | SPATA5L1 | spermatogenesis associated 5-like 1                                             | -0,4565 | 0,7287 | 0,0002 | 0,0026 |
| ENSG00000196141 | SPATS2L  | spermatogenesis associated, serine-rich 2-like                                  | -0,4773 | 0,7183 | 0,0000 | 0,0000 |
| ENSG00000161888 | SPC24    | SPC24, NDC80 kinetochore complex component                                      | 0,4852  | 1,3998 | 0,0000 | 0,0000 |

|                 |            |                                                                                  |         |        |        |        |
|-----------------|------------|----------------------------------------------------------------------------------|---------|--------|--------|--------|
| ENSG00000072195 | SPEG       | SPEG complex locus                                                               | 0,5486  | 1,4627 | 0,0002 | 0,0024 |
| ENSG00000183018 | SPNS2      | spinster homolog 2 (Drosophila)                                                  | 1,7086  | 3,2684 | 0,0000 | 0,0000 |
| ENSG00000262655 | SPON1      | spondin 1, extracellular matrix protein                                          | -2,4823 | 0,1790 | 0,0000 | 0,0000 |
| ENSG00000138600 | SPPL2A     | signal peptide peptidase like 2A                                                 | -0,4360 | 0,7392 | 0,0000 | 0,0000 |
| ENSG00000005206 | SPPL2B     | signal peptide peptidase like 2B                                                 | 0,4677  | 1,3829 | 0,0008 | 0,0078 |
| ENSG00000136158 | SPRY2      | sprouty RTK signaling antagonist 2                                               | -0,9074 | 0,5331 | 0,0000 | 0,0000 |
| ENSG00000123178 | SPRYD7     | SPRY domain containing 7                                                         | -0,5977 | 0,6608 | 0,0000 | 0,0000 |
| ENSG00000111671 | SPSB2      | splA/ryanodine receptor domain and SOCS box containing 2                         | 0,5571  | 1,4713 | 0,0001 | 0,0015 |
| ENSG00000162032 | SPSB3      | splA/ryanodine receptor domain and SOCS box containing 3                         | 0,7103  | 1,6361 | 0,0000 | 0,0000 |
| ENSG00000070182 | SPTB       | spectrin, beta, erythrocytic                                                     | 0,8824  | 1,8434 | 0,0000 | 0,0000 |
| ENSG00000173898 | SPTBN2     | spectrin, beta, non-erythrocytic 2                                               | 0,5730  | 1,4876 | 0,0000 | 0,0003 |
| ENSG00000100596 | SPTLC2     | serine palmitoyltransferase, long chain base subunit 2                           | -0,4155 | 0,7498 | 0,0000 | 0,0000 |
| ENSG00000104549 | SQLE       | squalene epoxidase                                                               | -0,4555 | 0,7293 | 0,0000 | 0,0000 |
| ENSG00000277363 | SRCIN1     | SRC kinase signaling inhibitor 1                                                 | 0,6179  | 1,5346 | 0,0000 | 0,0001 |
| ENSG00000072310 | SREBF1     | sterol regulatory element binding transcription factor 1                         | 0,5995  | 1,5152 | 0,0000 | 0,0000 |
| ENSG00000151304 | SRFBP1     | serum response factor binding protein 1                                          | -0,4050 | 0,7552 | 0,0000 | 0,0004 |
| ENSG00000248508 | SRP14-AS1  | SRP14 antisense RNA1 (head to head)                                              | 0,6274  | 1,5448 | 0,0002 | 0,0020 |
| ENSG00000096063 | SRPK1      | SRSF protein kinase 1                                                            | -0,4036 | 0,7560 | 0,0000 | 0,0001 |
| ENSG00000101955 | SRPX       | sushi-repeat containing protein, X-linked                                        | 1,4225  | 2,6804 | 0,0000 | 0,0000 |
| ENSG00000087087 | SRRT       | serrate, RNA effector molecule                                                   | -0,3927 | 0,7617 | 0,0000 | 0,0001 |
| ENSG00000136450 | SRSF1      | serine/arginine-rich splicing factor 1                                           | -0,6769 | 0,6255 | 0,0000 | 0,0000 |
| ENSG00000161547 | SRSF2      | serine/arginine-rich splicing factor 2                                           | -0,7494 | 0,5949 | 0,0000 | 0,0000 |
| ENSG00000115875 | SRSF7      | serine/arginine-rich splicing factor 7                                           | -0,4115 | 0,7518 | 0,0000 | 0,0001 |
| ENSG00000141380 | SS18       | synovial sarcoma translocation, chromosome 18                                    | -0,3786 | 0,7692 | 0,0000 | 0,0000 |
| ENSG00000146700 | SSC4D      | scavenger receptor cysteine rich family, 4 domains                               | 1,0435  | 2,0612 | 0,0000 | 0,0000 |
| ENSG00000197558 | SSPO       | SCO-spondin                                                                      | 1,1125  | 2,1622 | 0,0000 | 0,0000 |
| ENSG00000114850 | SSR3       | signal sequence receptor, gamma (translocon-associated protein gamma)            | -0,4537 | 0,7302 | 0,0000 | 0,0000 |
| ENSG00000126091 | ST3GAL3    | ST3 beta-galactoside alpha-2,3-sialyltransferase 3                               | 0,4477  | 1,3639 | 0,0007 | 0,0067 |
| ENSG00000073849 | ST6GAL1    | ST6 beta-galactosamide alpha-2,6-sialyltransferase 1                             | -0,3865 | 0,7650 | 0,0000 | 0,0007 |
| ENSG00000070731 | ST6GALNAC2 | ST6 (alpha-N-acetyl-neuraminy-2,3-beta-galactosyl-1,3)-N-acetylgalactosaminide a | 1,6301  | 3,0953 | 0,0000 | 0,0000 |
| ENSG00000160408 | ST6GALNAC6 | ST6 (alpha-N-acetyl-neuraminy-2,3-beta-galactosyl-1,3)-N-acetylgalactosaminide a | 0,7776  | 1,7143 | 0,0000 | 0,0000 |

|                 |          |                                                              |         |        |        |        |
|-----------------|----------|--------------------------------------------------------------|---------|--------|--------|--------|
| ENSG00000118007 | STAG1    | stromal antigen 1                                            | -0,5442 | 0,6858 | 0,0000 | 0,0000 |
| ENSG00000214530 | STARD10  | StAR-related lipid transfer (START) domain containing 10     | 0,3866  | 1,3073 | 0,0004 | 0,0045 |
| ENSG00000084090 | STARD7   | StAR-related lipid transfer (START) domain containing 7      | -0,5940 | 0,6625 | 0,0000 | 0,0000 |
| ENSG00000130052 | STARD8   | StAR-related lipid transfer (START) domain containing 8      | 0,9634  | 1,9500 | 0,0000 | 0,0000 |
| ENSG00000159433 | STARD9   | StAR-related lipid transfer (START) domain containing 9      | 0,5174  | 1,4314 | 0,0000 | 0,0002 |
| ENSG00000170581 | STAT2    | signal transducer and activator of transcription 2, 113kDa   | 0,4014  | 1,3208 | 0,0001 | 0,0008 |
| ENSG00000159167 | STC1     | stanniocalcin 1                                              | 0,7976  | 1,7382 | 0,0000 | 0,0000 |
| ENSG00000113739 | STC2     | stanniocalcin 2                                              | 0,6261  | 1,5433 | 0,0000 | 0,0000 |
| ENSG00000164647 | STEAP1   | six transmembrane epithelial antigen of the prostate 1       | -0,6685 | 0,6292 | 0,0000 | 0,0000 |
| ENSG00000102572 | STK24    | serine/threonine kinase 24                                   | -0,7866 | 0,5797 | 0,0000 | 0,0000 |
| ENSG00000169302 | STK32A   | serine/threonine kinase 32A                                  | 0,9740  | 1,9643 | 0,0000 | 0,0000 |
| ENSG00000101109 | STK4     | serine/threonine kinase 4                                    | -0,4134 | 0,7508 | 0,0000 | 0,0000 |
| ENSG00000197457 | STMN3    | stathmin-like 3                                              | -0,3942 | 0,7609 | 0,0002 | 0,0024 |
| ENSG00000001460 | STPG1    | sperm-tail PG-rich repeat containing 1                       | 0,4671  | 1,3824 | 0,0010 | 0,0090 |
| ENSG00000169689 | STRA13   | stimulated by retinoic acid 13                               | 0,5026  | 1,4167 | 0,0000 | 0,0000 |
| ENSG00000082146 | STRADB   | STE20-related kinase adaptor beta                            | -0,5231 | 0,6959 | 0,0000 | 0,0003 |
| ENSG00000090372 | STRN4    | striatin, calmodulin binding protein 4                       | 0,3824  | 1,3035 | 0,0006 | 0,0060 |
| ENSG00000106089 | STX1A    | syntaxin 1A (brain)                                          | 0,5252  | 1,4392 | 0,0000 | 0,0000 |
| ENSG00000162236 | STX5     | syntaxin 5                                                   | 0,3818  | 1,3030 | 0,0000 | 0,0002 |
| ENSG00000164506 | STXBP5   | syntaxin binding protein 5 (tomosyn)                         | -0,4662 | 0,7239 | 0,0000 | 0,0000 |
| ENSG00000113387 | SUB1     | SUB1 homolog, transcriptional regulator                      | -0,4247 | 0,7450 | 0,0000 | 0,0001 |
| ENSG00000136143 | SUCLA2   | succinate-CoA ligase, ADP-forming, beta subunit              | -0,6764 | 0,6257 | 0,0000 | 0,0000 |
| ENSG00000165416 | SUGT1    | SGT1 homolog, MIS12 kinetochore complex assembly cochaperone | -0,6400 | 0,6417 | 0,0000 | 0,0000 |
| ENSG00000198203 | SULT1C2  | sulfotransferase family, cytosolic, 1C, member 2             | 1,1948  | 2,2891 | 0,0000 | 0,0000 |
| ENSG00000139531 | SUOX     | sulfite oxidase                                              | 0,4470  | 1,3632 | 0,0000 | 0,0001 |
| ENSG00000102710 | SUPT20H  | SPT20 homolog, SAGA complex component                        | -0,4359 | 0,7392 | 0,0000 | 0,0000 |
| ENSG00000152455 | SUV39H2  | suppressor of variegation 3-9 homolog 2 (Drosophila)         | -0,4863 | 0,7138 | 0,0000 | 0,0000 |
| ENSG00000133247 | SUV420H2 | suppressor of variegation 4-20 homolog 2 (Drosophila)        | 0,9417  | 1,9207 | 0,0000 | 0,0000 |
| ENSG00000147642 | SYBU     | syntabulin (syntaxin-interacting)                            | 1,0094  | 2,0130 | 0,0000 | 0,0000 |
| ENSG00000161860 | SYCE2    | synaptonemal complex central element protein 2               | 0,8713  | 1,8293 | 0,0000 | 0,0003 |
| ENSG00000196074 | SYCP2    | synaptonemal complex protein 2                               | -0,9056 | 0,5338 | 0,0006 | 0,0057 |

|                 |          |                                                                                   |         |        |        |        |
|-----------------|----------|-----------------------------------------------------------------------------------|---------|--------|--------|--------|
| ENSG00000135316 | SYNCRIP  | synaptotagmin binding, cytoplasmic RNA interacting protein                        | -0,5106 | 0,7019 | 0,0000 | 0,0000 |
| ENSG00000131018 | SYNE1    | spectrin repeat containing, nuclear envelope 1                                    | 0,8703  | 1,8281 | 0,0000 | 0,0000 |
| ENSG00000181392 | SYNE4    | spectrin repeat containing, nuclear envelope family member 4                      | 1,4858  | 2,8007 | 0,0000 | 0,0000 |
| ENSG00000100321 | SYNGR1   | synaptogyrin 1                                                                    | 0,6259  | 1,5432 | 0,0000 | 0,0001 |
| ENSG00000171992 | SYNPO    | synaptopodin                                                                      | 0,9236  | 1,8969 | 0,0000 | 0,0001 |
| ENSG00000008282 | SYPL1    | synaptophysin-like 1                                                              | -0,6051 | 0,6574 | 0,0000 | 0,0000 |
| ENSG00000204070 | SYS1     | Sys1 golgi trafficking protein                                                    | -0,4162 | 0,7494 | 0,0000 | 0,0003 |
| ENSG00000019505 | SYT13    | synaptotagmin XIII                                                                | 1,4885  | 2,8059 | 0,0000 | 0,0000 |
| ENSG00000011347 | SYT7     | synaptotagmin VII                                                                 | 0,7554  | 1,6881 | 0,0000 | 0,0000 |
| ENSG00000142765 | SYTL1    | synaptotagmin-like 1                                                              | 0,7967  | 1,7371 | 0,0003 | 0,0029 |
| ENSG00000164674 | SYTL3    | synaptotagmin-like 3                                                              | 1,0198  | 2,0277 | 0,0000 | 0,0000 |
| ENSG00000164458 | T        | T brachyury transcription factor                                                  | -0,9598 | 0,5141 | 0,0000 | 0,0000 |
| ENSG00000100324 | TAB1     | TGF-beta activated kinase 1/MAP3K7 binding protein 1                              | 0,5640  | 1,4783 | 0,0000 | 0,0000 |
| ENSG00000197780 | TAF13    | TAF13 RNA polymerase II, TATA box binding protein (TBP)-associated factor, 18kDa  | -0,4880 | 0,7130 | 0,0000 | 0,0005 |
| ENSG00000166012 | TAF1D    | TATA box binding protein (TBP)-associated factor, RNA polymerase I, D, 41kDa      | -0,4729 | 0,7205 | 0,0000 | 0,0001 |
| ENSG00000141384 | TAF4B    | TAF4b RNA polymerase II, TATA box binding protein (TBP)-associated factor, 105kDa | -0,3853 | 0,7656 | 0,0005 | 0,0051 |
| ENSG00000187325 | TAF9B    | TAF9B RNA polymerase II, TATA box binding protein (TBP)-associated factor, 31kDa  | -0,5898 | 0,6644 | 0,0000 | 0,0000 |
| ENSG00000164691 | TAGAP    | T-cell activation RhoGTPase activating protein                                    | -1,2178 | 0,4299 | 0,0000 | 0,0001 |
| ENSG00000204267 | TAP2     | transporter 2, ATP-binding cassette, sub-family B (MDR/TAP)                       | -0,5615 | 0,6776 | 0,0000 | 0,0000 |
| ENSG00000157014 | TATDN2   | TatD DNase domain containing 2                                                    | -0,4726 | 0,7207 | 0,0000 | 0,0000 |
| ENSG00000203705 | TATDN3   | TatD DNase domain containing 3                                                    | 0,6303  | 1,5479 | 0,0000 | 0,0000 |
| ENSG00000102125 | TAZ      | tafazzin                                                                          | 0,4265  | 1,3440 | 0,0000 | 0,0005 |
| ENSG00000175463 | TBC1D10C | TBC1 domain family, member 10C                                                    | 1,5037  | 2,8357 | 0,0000 | 0,0000 |
| ENSG00000104946 | TBC1D17  | TBC1 domain family, member 17                                                     | 0,5864  | 1,5015 | 0,0000 | 0,0000 |
| ENSG00000095383 | TBC1D2   | TBC1 domain family, member 2                                                      | -0,3905 | 0,7629 | 0,0007 | 0,0068 |
| ENSG00000068354 | TBC1D25  | TBC1 domain family, member 25                                                     | 0,4060  | 1,3250 | 0,0002 | 0,0021 |
| ENSG00000136111 | TBC1D4   | TBC1 domain family, member 4                                                      | -0,7459 | 0,5963 | 0,0000 | 0,0000 |
| ENSG00000177565 | TBL1XR1  | transducin (beta)-like 1 X-linked receptor 1                                      | -0,4249 | 0,7449 | 0,0000 | 0,0000 |
| ENSG00000112837 | TBX18    | T-box 18                                                                          | 0,5884  | 1,5036 | 0,0000 | 0,0000 |
| ENSG00000165929 | TC2N     | tandem C2 domains, nuclear                                                        | -0,5292 | 0,6929 | 0,0000 | 0,0000 |
| ENSG00000204219 | TCEA3    | transcription elongation factor A (SII), 3                                        | 0,8319  | 1,7800 | 0,0000 | 0,0000 |

|                 |          |                                                                               |         |        |        |        |
|-----------------|----------|-------------------------------------------------------------------------------|---------|--------|--------|--------|
| ENSG00000154582 | TCEB1    | transcription elongation factor B (SIII), polypeptide 1 (15kDa, elongin C)    | -0,4105 | 0,7524 | 0,0001 | 0,0015 |
| ENSG00000103363 | TCEB2    | transcription elongation factor B (SIII), polypeptide 2 (18kDa, elongin B)    | 0,4007  | 1,3202 | 0,0008 | 0,0080 |
| ENSG00000152284 | TCF7L1   | transcription factor 7-like 1 (T-cell specific, HMG-box)                      | 0,6541  | 1,5736 | 0,0000 | 0,0000 |
| ENSG00000159450 | TCHH     | trichohyalin                                                                  | -0,6663 | 0,6301 | 0,0003 | 0,0036 |
| ENSG00000166046 | TCP11L2  | t-complex 11, testis-specific-like 2                                          | 1,2275  | 2,3416 | 0,0000 | 0,0000 |
| ENSG00000213123 | TCTEX1D2 | Tctex1 domain containing 2                                                    | -0,7220 | 0,6063 | 0,0000 | 0,0000 |
| ENSG00000168778 | TCTN2    | tectonic family member 2                                                      | 0,9045  | 1,8719 | 0,0000 | 0,0000 |
| ENSG00000139372 | TDG      | thymine DNA glycosylase                                                       | -0,4687 | 0,7226 | 0,0000 | 0,0001 |
| ENSG00000083544 | TDRD3    | tudor domain containing 3                                                     | -0,4426 | 0,7358 | 0,0000 | 0,0002 |
| ENSG00000205356 | TECPR1   | tectonin beta-propeller repeat containing 1                                   | 0,5110  | 1,4250 | 0,0001 | 0,0010 |
| ENSG00000167074 | TEF      | thyrotrophic embryonic factor                                                 | 0,5679  | 1,4824 | 0,0000 | 0,0000 |
| ENSG00000172171 | TEFM     | transcription elongation factor, mitochondrial                                | -0,4742 | 0,7199 | 0,0002 | 0,0019 |
| ENSG00000009694 | TENM1    | teneurin transmembrane protein 1                                              | -0,6312 | 0,6457 | 0,0005 | 0,0055 |
| ENSG00000145934 | TENM2    | teneurin transmembrane protein 2                                              | -1,5582 | 0,3396 | 0,0000 | 0,0000 |
| ENSG00000182459 | TEX19    | testis expressed 19                                                           | 1,0054  | 2,0075 | 0,0000 | 0,0000 |
| ENSG00000144043 | TEX261   | testis expressed 261                                                          | -0,4379 | 0,7382 | 0,0000 | 0,0000 |
| ENSG00000151287 | TEX30    | testis expressed 30                                                           | -0,8045 | 0,5726 | 0,0000 | 0,0000 |
| ENSG00000226674 | TEX41    | testis expressed 41 (non-protein coding)                                      | -0,9465 | 0,5189 | 0,0003 | 0,0037 |
| ENSG00000108064 | TFAM     | transcription factor A, mitochondrial                                         | -0,5242 | 0,6953 | 0,0000 | 0,0000 |
| ENSG00000087510 | TFAP2C   | transcription factor AP-2 gamma (activating enhancer binding protein 2 gamma) | 0,3806  | 1,3019 | 0,0001 | 0,0013 |
| ENSG00000162851 | TFB2M    | transcription factor B2, mitochondrial                                        | -0,4296 | 0,7425 | 0,0001 | 0,0009 |
| ENSG00000198176 | TFDP1    | transcription factor Dp-1                                                     | -0,9771 | 0,5080 | 0,0000 | 0,0000 |
| ENSG00000068323 | TFE3     | transcription factor binding to IGHM enhancer 3                               | -0,4606 | 0,7267 | 0,0000 | 0,0000 |
| ENSG00000072274 | TFRC     | transferrin receptor                                                          | -0,6613 | 0,6323 | 0,0000 | 0,0000 |
| ENSG00000184436 | THAP7    | THAP domain containing 7                                                      | 0,4581  | 1,3737 | 0,0006 | 0,0061 |
| ENSG00000161277 | THAP8    | THAP domain containing 8                                                      | 0,9090  | 1,8777 | 0,0000 | 0,0000 |
| ENSG00000169231 | THBS3    | thrombospondin 3                                                              | 0,9606  | 1,9461 | 0,0000 | 0,0000 |
| ENSG00000130775 | THEMIS2  | thymocyte selection associated family member 2                                | 0,6899  | 1,6132 | 0,0000 | 0,0000 |
| ENSG00000131652 | THOC6    | THO complex 6                                                                 | 0,9347  | 1,9115 | 0,0000 | 0,0000 |
| ENSG00000126351 | THRA     | thyroid hormone receptor, alpha                                               | 0,5170  | 1,4310 | 0,0000 | 0,0000 |
| ENSG00000259431 | THTPA    | thiamine triphosphatase                                                       | 0,5587  | 1,4729 | 0,0001 | 0,0018 |



|                 |         |                                                                  |         |        |        |        |
|-----------------|---------|------------------------------------------------------------------|---------|--------|--------|--------|
| ENSG00000066654 | THUMP1  | THUMP domain containing 1                                        | -0,4263 | 0,7442 | 0,0000 | 0,0000 |
| ENSG00000078237 | TIGAR   | TP53 induced glycolysis regulatory phosphatase                   | -0,4293 | 0,7426 | 0,0000 | 0,0002 |
| ENSG00000180346 | TIGD2   | tigger transposable element derived 2                            | -1,2305 | 0,4262 | 0,0000 | 0,0000 |
| ENSG00000173825 | TIGD3   | tigger transposable element derived 3                            | 0,7096  | 1,6353 | 0,0003 | 0,0030 |
| ENSG00000134809 | TIMM10  | translocase of inner mitochondrial membrane 10 homolog (yeast)   | -0,4442 | 0,7350 | 0,0000 | 0,0004 |
| ENSG00000132286 | TIMM10B | translocase of inner mitochondrial membrane 10 homolog B (yeast) | -0,4257 | 0,7445 | 0,0000 | 0,0001 |
| ENSG00000134375 | TIMM17A | translocase of inner mitochondrial membrane 17 homolog A (yeast) | -0,4460 | 0,7341 | 0,0001 | 0,0008 |
| ENSG00000126768 | TIMM17B | translocase of inner mitochondrial membrane 17 homolog B (yeast) | 0,4925  | 1,4069 | 0,0000 | 0,0000 |
| ENSG00000126953 | TIMM8A  | translocase of inner mitochondrial membrane 8 homolog A (yeast)  | -0,3849 | 0,7658 | 0,0002 | 0,0020 |
| ENSG00000100575 | TIMM9   | translocase of inner mitochondrial membrane 9 homolog (yeast)    | -0,4263 | 0,7442 | 0,0000 | 0,0005 |
| ENSG00000100234 | TIMP3   | TIMP metalloproteinase inhibitor 3                               | 0,5923  | 1,5076 | 0,0000 | 0,0000 |
| ENSG00000142910 | TINAGL1 | tubulointerstitial nephritis antigen-like 1                      | -0,6417 | 0,6410 | 0,0000 | 0,0000 |
| ENSG00000223573 | TINCR   | tissue differentiation-inducing non-protein coding RNA           | 0,8740  | 1,8328 | 0,0002 | 0,0023 |
| ENSG00000105289 | TJP3    | tight junction protein 3                                         | 0,5284  | 1,4424 | 0,0004 | 0,0047 |
| ENSG00000149476 | TKFC    | triokinase/FMN cyclase                                           | 0,6523  | 1,5717 | 0,0000 | 0,0000 |
| ENSG00000160606 | TLCD1   | TLC domain containing 1                                          | 0,8851  | 1,8469 | 0,0000 | 0,0000 |
| ENSG00000185561 | TLCD2   | TLC domain containing 2                                          | 0,7908  | 1,7300 | 0,0000 | 0,0000 |
| ENSG00000101342 | TLDC2   | TBC/LysM-associated domain containing 2                          | 0,4850  | 1,3996 | 0,0000 | 0,0006 |
| ENSG00000104953 | TLE6    | transducin-like enhancer of split 6                              | 0,7526  | 1,6849 | 0,0004 | 0,0047 |
| ENSG00000095587 | TLL2    | tolloid-like 2                                                   | -0,9348 | 0,5231 | 0,0000 | 0,0000 |
| ENSG00000137462 | TLR2    | toll-like receptor 2                                             | -0,8153 | 0,5683 | 0,0000 | 0,0002 |
| ENSG00000164342 | TLR3    | toll-like receptor 3                                             | 0,8363  | 1,7855 | 0,0000 | 0,0001 |
| ENSG00000136869 | TLR4    | toll-like receptor 4                                             | -0,7498 | 0,5947 | 0,0000 | 0,0000 |
| ENSG00000169490 | TM2D2   | TM2 domain containing 2                                          | -0,4136 | 0,7508 | 0,0000 | 0,0002 |
| ENSG00000149809 | TM7SF2  | transmembrane 7 superfamily member 2                             | 0,5295  | 1,4434 | 0,0000 | 0,0001 |
| ENSG00000064115 | TM7SF3  | transmembrane 7 superfamily member 3                             | -0,4095 | 0,7529 | 0,0000 | 0,0001 |
| ENSG00000125304 | TM9SF2  | transmembrane 9 superfamily member 2                             | -1,0136 | 0,4953 | 0,0000 | 0,0000 |
| ENSG00000077147 | TM9SF3  | transmembrane 9 superfamily member 3                             | -0,5254 | 0,6948 | 0,0000 | 0,0000 |
| ENSG00000155957 | TMBIM4  | transmembrane BAX inhibitor motif containing 4                   | -0,5775 | 0,6701 | 0,0000 | 0,0003 |
| ENSG00000139644 | TMBIM6  | transmembrane BAX inhibitor motif containing 6                   | -0,4825 | 0,7158 | 0,0000 | 0,0000 |
| ENSG00000167608 | TMC4    | transmembrane channel-like 4                                     | 1,3333  | 2,5199 | 0,0000 | 0,0000 |

|                 |                |                                               |         |        |        |        |
|-----------------|----------------|-----------------------------------------------|---------|--------|--------|--------|
| ENSG00000141524 | TMC6           | transmembrane channel-like 6                  | 0,4852  | 1,3998 | 0,0002 | 0,0026 |
| ENSG00000167895 | TMC8           | transmembrane channel-like 8                  | 0,7234  | 1,6510 | 0,0000 | 0,0000 |
| ENSG00000172765 | TMCC1          | transmembrane and coiled-coil domain family 1 | 0,3910  | 1,3113 | 0,0000 | 0,0002 |
| ENSG00000150403 | TMCO3          | transmembrane and coiled-coil domains 3       | -0,6074 | 0,6564 | 0,0000 | 0,0000 |
| ENSG00000099203 | TMED1          | transmembrane p24 trafficking protein 1       | 0,4306  | 1,3478 | 0,0010 | 0,0092 |
| ENSG00000248592 | TMEM110-MUSTN1 | TMEM110-MUSTN1 readthrough                    | 0,9629  | 1,9492 | 0,0003 | 0,0036 |
| ENSG00000139173 | TMEM117        | transmembrane protein 117                     | 0,4593  | 1,3749 | 0,0001 | 0,0012 |
| ENSG00000179178 | TMEM125        | transmembrane protein 125                     | 0,7928  | 1,7324 | 0,0000 | 0,0007 |
| ENSG00000172663 | TMEM134        | transmembrane protein 134                     | 0,7609  | 1,6945 | 0,0000 | 0,0000 |
| ENSG00000244187 | TMEM141        | transmembrane protein 141                     | 0,6826  | 1,6051 | 0,0000 | 0,0000 |
| ENSG00000161558 | TMEM143        | transmembrane protein 143                     | 1,0148  | 2,0206 | 0,0000 | 0,0000 |
| ENSG00000249242 | TMEM150C       | transmembrane protein 150C                    | 0,6593  | 1,5793 | 0,0000 | 0,0000 |
| ENSG00000249992 | TMEM158        | transmembrane protein 158 (gene/pseudogene)   | -1,0546 | 0,4814 | 0,0000 | 0,0000 |
| ENSG00000064545 | TMEM161A       | transmembrane protein 161A                    | 0,6367  | 1,5548 | 0,0000 | 0,0000 |
| ENSG00000134851 | TMEM165        | transmembrane protein 165                     | -0,4692 | 0,7224 | 0,0000 | 0,0000 |
| ENSG00000205269 | TMEM170B       | transmembrane protein 170B                    | -0,6642 | 0,6310 | 0,0000 | 0,0000 |
| ENSG00000177854 | TMEM187        | transmembrane protein 187                     | 0,5957  | 1,5112 | 0,0000 | 0,0006 |
| ENSG00000182796 | TMEM198B       | transmembrane protein 198B, pseudogene        | 0,5136  | 1,4276 | 0,0000 | 0,0000 |
| ENSG00000135048 | TMEM2          | transmembrane protein 2                       | 0,4754  | 1,3904 | 0,0000 | 0,0000 |
| ENSG00000164484 | TMEM200A       | transmembrane protein 200A                    | -2,3101 | 0,2016 | 0,0000 | 0,0000 |
| ENSG00000253304 | TMEM200B       | transmembrane protein 200B                    | -0,5695 | 0,6739 | 0,0009 | 0,0082 |
| ENSG00000205084 | TMEM231        | transmembrane protein 231                     | 0,3927  | 1,3128 | 0,0002 | 0,0029 |
| ENSG00000135185 | TMEM243        | transmembrane protein 243, mitochondrial      | -0,4465 | 0,7338 | 0,0000 | 0,0002 |
| ENSG00000133678 | TMEM254        | transmembrane protein 254                     | 0,6875  | 1,6105 | 0,0000 | 0,0000 |
| ENSG00000205544 | TMEM256        | transmembrane protein 256                     | 0,5682  | 1,4826 | 0,0000 | 0,0000 |
| ENSG00000182087 | TMEM259        | transmembrane protein 259                     | 0,4395  | 1,3561 | 0,0005 | 0,0052 |
| ENSG00000182107 | TMEM30B        | transmembrane protein 30B                     | -0,5811 | 0,6685 | 0,0001 | 0,0008 |
| ENSG00000088726 | TMEM40         | transmembrane protein 40                      | 0,7279  | 1,6563 | 0,0000 | 0,0000 |
| ENSG00000169964 | TMEM42         | transmembrane protein 42                      | 0,5773  | 1,4921 | 0,0000 | 0,0000 |
| ENSG00000231770 | TMEM44-AS1     | TMEM44 antisense RNA 1                        | 0,6275  | 1,5449 | 0,0001 | 0,0009 |
| ENSG00000147027 | TMEM47         | transmembrane protein 47                      | -0,5550 | 0,6806 | 0,0000 | 0,0000 |

|                 |            |                                                                                 |         |        |        |        |
|-----------------|------------|---------------------------------------------------------------------------------|---------|--------|--------|--------|
| ENSG00000118600 | TMEM5      | transmembrane protein 5                                                         | -0,5543 | 0,6810 | 0,0000 | 0,0001 |
| ENSG00000175147 | TMEM51-AS1 | TMEM51 antisense RNA 1                                                          | -0,4484 | 0,7328 | 0,0007 | 0,0067 |
| ENSG00000178821 | TMEM52     | transmembrane protein 52                                                        | 0,5803  | 1,4952 | 0,0003 | 0,0031 |
| ENSG00000126106 | TMEM53     | transmembrane protein 53                                                        | 0,5375  | 1,4515 | 0,0002 | 0,0024 |
| ENSG00000121900 | TMEM54     | transmembrane protein 54                                                        | 0,6850  | 1,6078 | 0,0000 | 0,0000 |
| ENSG00000165782 | TMEM55B    | transmembrane protein 55B                                                       | 0,5485  | 1,4626 | 0,0000 | 0,0000 |
| ENSG00000177042 | TMEM80     | transmembrane protein 80                                                        | 0,4840  | 1,3986 | 0,0000 | 0,0001 |
| ENSG00000151117 | TMEM86A    | transmembrane protein 86A                                                       | 0,9045  | 1,8718 | 0,0000 | 0,0000 |
| ENSG00000153214 | TMEM87B    | transmembrane protein 87B                                                       | -0,3955 | 0,7602 | 0,0000 | 0,0002 |
| ENSG00000137103 | TMEM8B     | transmembrane protein 8B                                                        | 0,9378  | 1,9156 | 0,0000 | 0,0000 |
| ENSG00000167105 | TMEM92     | transmembrane protein 92                                                        | -0,5579 | 0,6793 | 0,0000 | 0,0000 |
| ENSG00000177728 | TMEM94     | transmembrane protein 94                                                        | 0,3970  | 1,3168 | 0,0004 | 0,0044 |
| ENSG00000109084 | TMEM97     | transmembrane protein 97                                                        | -0,7451 | 0,5966 | 0,0000 | 0,0000 |
| ENSG00000254860 | TMEM9B-AS1 | TMEM9B antisense RNA 1                                                          | 0,9583  | 1,9430 | 0,0000 | 0,0003 |
| ENSG00000136842 | TMOD1      | tropomodulin 1                                                                  | 0,9497  | 1,9314 | 0,0000 | 0,0000 |
| ENSG00000128872 | TMOD2      | tropomodulin 2 (neuronal)                                                       | -0,3858 | 0,7654 | 0,0002 | 0,0023 |
| ENSG00000160183 | TMPRSS3    | transmembrane protease, serine 3                                                | 1,0553  | 2,0782 | 0,0000 | 0,0000 |
| ENSG00000137648 | TMPRSS4    | transmembrane protease, serine 4                                                | 0,9301  | 1,9054 | 0,0003 | 0,0031 |
| ENSG00000187045 | TMPRSS6    | transmembrane protease, serine 6                                                | 1,0260  | 2,0364 | 0,0002 | 0,0022 |
| ENSG00000125247 | TMTC4      | transmembrane and tetra-tricopeptide repeat containing 4                        | -0,4838 | 0,7151 | 0,0001 | 0,0009 |
| ENSG00000139921 | TMX1       | thioredoxin-related transmembrane protein 1                                     | -0,4620 | 0,7260 | 0,0000 | 0,0000 |
| ENSG00000213593 | TMX2       | thioredoxin-related transmembrane protein 2                                     | -0,5075 | 0,7034 | 0,0000 | 0,0000 |
| ENSG00000041982 | TNC        | tenascin C                                                                      | -1,1911 | 0,4380 | 0,0000 | 0,0000 |
| ENSG00000185215 | TNFAIP2    | tumor necrosis factor, alpha-induced protein 2                                  | -0,4474 | 0,7334 | 0,0000 | 0,0001 |
| ENSG00000118503 | TNFAIP3    | tumor necrosis factor, alpha-induced protein 3                                  | -0,5841 | 0,6671 | 0,0001 | 0,0017 |
| ENSG00000173530 | TNFRSF10D  | tumor necrosis factor receptor superfamily, member 10d, decoy with truncated de | -0,5235 | 0,6957 | 0,0000 | 0,0000 |
| ENSG00000164761 | TNFRSF11B  | tumor necrosis factor receptor superfamily, member 11b                          | 0,5601  | 1,4743 | 0,0000 | 0,0000 |
| ENSG00000157873 | TNFRSF14   | tumor necrosis factor receptor superfamily, member 14                           | 0,6743  | 1,5958 | 0,0000 | 0,0005 |
| ENSG00000186891 | TNFRSF18   | tumor necrosis factor receptor superfamily, member 18                           | 0,8199  | 1,7653 | 0,0000 | 0,0001 |
| ENSG00000127863 | TNFRSF19   | tumor necrosis factor receptor superfamily, member 19                           | 0,4327  | 1,3498 | 0,0000 | 0,0000 |
| ENSG00000049249 | TNFRSF9    | tumor necrosis factor receptor superfamily, member 9                            | -0,7409 | 0,5984 | 0,0000 | 0,0000 |

|                 |            |                                                                     |         |        |        |        |
|-----------------|------------|---------------------------------------------------------------------|---------|--------|--------|--------|
| ENSG00000121858 | TNFSF10    | tumor necrosis factor (ligand) superfamily, member 10               | 1,0816  | 2,1163 | 0,0000 | 0,0000 |
| ENSG00000125657 | TNFSF9     | tumor necrosis factor (ligand) superfamily, member 9                | 0,5246  | 1,4385 | 0,0000 | 0,0005 |
| ENSG00000114854 | TNNC1      | troponin C type 1 (slow)                                            | 0,3932  | 1,3133 | 0,0001 | 0,0019 |
| ENSG00000083312 | TNPO1      | transportin 1                                                       | -0,6451 | 0,6395 | 0,0000 | 0,0000 |
| ENSG00000204282 | TNRC6C-AS1 | TNRC6C antisense RNA 1                                              | 0,3966  | 1,3164 | 0,0006 | 0,0058 |
| ENSG00000079308 | TNS1       | tensin 1                                                            | 1,1719  | 2,2531 | 0,0000 | 0,0000 |
| ENSG00000136205 | TNS3       | tensin 3                                                            | -0,5744 | 0,6716 | 0,0000 | 0,0000 |
| ENSG00000100284 | TOM1       | target of myb1 membrane trafficking protein                         | 0,6289  | 1,5463 | 0,0000 | 0,0000 |
| ENSG00000158882 | TOMM40L    | translocase of outer mitochondrial membrane 40 homolog (yeast)-like | -0,4018 | 0,7569 | 0,0000 | 0,0007 |
| ENSG00000198900 | TOP1       | topoisomerase (DNA) I                                               | -0,6262 | 0,6479 | 0,0000 | 0,0000 |
| ENSG00000164938 | TP53INP1   | tumor protein p53 inducible nuclear protein 1                       | 0,9021  | 1,8688 | 0,0000 | 0,0000 |
| ENSG00000172315 | TP53RK     | TP53 regulating kinase                                              | -0,4369 | 0,7387 | 0,0002 | 0,0019 |
| ENSG00000111907 | TPD52L1    | tumor protein D52-like 1                                            | -0,4591 | 0,7274 | 0,0000 | 0,0000 |
| ENSG00000143549 | TPM3       | tropomyosin 3                                                       | -0,4704 | 0,7217 | 0,0000 | 0,0000 |
| ENSG00000134900 | TPP2       | tripeptidyl peptidase II                                            | -1,0476 | 0,4838 | 0,0000 | 0,0000 |
| ENSG00000171368 | TPPP       | tubulin polymerization promoting protein                            | 1,1490  | 2,2177 | 0,0000 | 0,0000 |
| ENSG00000159713 | TPPP3      | tubulin polymerization-promoting protein family member 3            | 1,3749  | 2,5935 | 0,0000 | 0,0000 |
| ENSG00000180438 | TPRXL      | tetra-peptide repeat homeobox-like                                  | 0,4592  | 1,3747 | 0,0009 | 0,0082 |
| ENSG00000116176 | TPSG1      | tryptase gamma 1                                                    | 1,8164  | 3,5221 | 0,0000 | 0,0000 |
| ENSG00000260284 | TPSP2      | tryptase pseudogene 2                                               | 0,9841  | 1,9781 | 0,0003 | 0,0037 |
| ENSG00000133112 | TPT1       | tumor protein, translationally-controlled 1                         | -0,4138 | 0,7506 | 0,0000 | 0,0001 |
| ENSG00000100181 | TPTEP1     | transmembrane phosphatase with tensin homology pseudogene 1         | -0,4648 | 0,7246 | 0,0001 | 0,0017 |
| ENSG00000186854 | TRABD2A    | TraB domain containing 2A                                           | -0,5106 | 0,7019 | 0,0000 | 0,0000 |
| ENSG00000102871 | TRADD      | TNFRSF1A-associated via death domain                                | 0,4270  | 1,3444 | 0,0003 | 0,0038 |
| ENSG00000131323 | TRAF3      | TNF receptor-associated factor 3                                    | -0,5273 | 0,6939 | 0,0000 | 0,0000 |
| ENSG00000056972 | TRAF3IP2   | TRAF3 interacting protein 2                                         | 0,8102  | 1,7535 | 0,0008 | 0,0081 |
| ENSG00000009790 | TRAF3IP3   | TRAF3 interacting protein 3                                         | 0,9999  | 1,9998 | 0,0000 | 0,0000 |
| ENSG00000168016 | TRANK1     | tetratricopeptide repeat and ankyrin repeat containing 1            | 0,9916  | 1,9883 | 0,0000 | 0,0000 |
| ENSG00000007255 | TRAPPC6A   | trafficking protein particle complex 6A                             | 0,5557  | 1,4699 | 0,0001 | 0,0014 |
| ENSG00000211829 | TRDC       | T cell receptor delta constant                                      | 2,6047  | 6,0824 | 0,0000 | 0,0000 |
| ENSG00000095970 | TREM2      | triggering receptor expressed on myeloid cells 2                    | 1,2047  | 2,3049 | 0,0000 | 0,0000 |

|                  |          |                                                                    |         |        |        |        |
|------------------|----------|--------------------------------------------------------------------|---------|--------|--------|--------|
| ENSG00000173334  | TRIB1    | tribbles pseudokinase 1                                            | -0,4151 | 0,7500 | 0,0000 | 0,0000 |
| ENSG00000101255  | TRIB3    | tribbles pseudokinase 3                                            | 1,0338  | 2,0474 | 0,0000 | 0,0000 |
| ENSG00000204977  | TRIM13   | tripartite motif containing 13                                     | -0,4828 | 0,7156 | 0,0000 | 0,0000 |
| ENSG00000221926  | TRIM16   | tripartite motif containing 16                                     | -0,4110 | 0,7521 | 0,0000 | 0,0000 |
| ENSG00000104228  | TRIM35   | tripartite motif containing 35                                     | -0,6466 | 0,6388 | 0,0000 | 0,0000 |
| ENSG00000134253  | TRIM45   | tripartite motif containing 45                                     | 0,6740  | 1,5955 | 0,0000 | 0,0000 |
| ENSG00000138100  | TRIM54   | tripartite motif containing 54                                     | 0,9313  | 1,9070 | 0,0005 | 0,0055 |
| ENSG00000147573  | TRIM55   | tripartite motif containing 55                                     | -1,0805 | 0,4729 | 0,0001 | 0,0011 |
| ENSG00000178809  | TRIM73   | tripartite motif containing 73                                     | 1,0326  | 2,0457 | 0,0000 | 0,0001 |
| ENSG00000100815  | TRIP11   | thyroid hormone receptor interactor 11                             | -0,4226 | 0,7461 | 0,0000 | 0,0000 |
| ENSG00000205133  | TRIQQ    | triple QxxK/R motif containing                                     | 0,4124  | 1,3309 | 0,0002 | 0,0028 |
| ENSG00000174173  | TRMT10C  | tRNA methyltransferase 10C, mitochondrial RNase P subunit          | -0,4328 | 0,7408 | 0,0006 | 0,0060 |
| ENSG00000122435  | TRMT13   | tRNA methyltransferase 13 homolog ( <i>S. cerevisiae</i> )         | -0,4298 | 0,7424 | 0,0001 | 0,0018 |
| ENSG000000089195 | TRMT6    | tRNA methyltransferase 6                                           | -0,3948 | 0,7606 | 0,0004 | 0,0042 |
| ENSG00000166166  | TRMT61A  | tRNA methyltransferase 61A                                         | -0,4862 | 0,7139 | 0,0001 | 0,0016 |
| ENSG00000253368  | TRNP1    | TMF1-regulated nuclear protein 1                                   | -0,4615 | 0,7262 | 0,0001 | 0,0010 |
| ENSG00000072756  | TRNT1    | tRNA nucleotidyl transferase, CCA-adding, 1                        | -0,5742 | 0,6717 | 0,0000 | 0,0000 |
| ENSG00000230061  | TRPM2-AS | TRPM2 antisense RNA                                                | 0,4687  | 1,3839 | 0,0001 | 0,0018 |
| ENSG00000119121  | TRPM6    | transient receptor potential cation channel, subfamily M, member 6 | -0,6280 | 0,6471 | 0,0004 | 0,0040 |
| ENSG00000144481  | TRPM8    | transient receptor potential cation channel, subfamily M, member 8 | 1,2398  | 2,3617 | 0,0000 | 0,0000 |
| ENSG00000104447  | TRPS1    | trichorhinophalangeal syndrome I                                   | -2,1598 | 0,2238 | 0,0000 | 0,0000 |
| ENSG00000149743  | TRPT1    | tRNA phosphotransferase 1                                          | 0,4049  | 1,3240 | 0,0000 | 0,0005 |
| ENSG00000196689  | TRPV1    | transient receptor potential cation channel, subfamily V, member 1 | 0,8912  | 1,8548 | 0,0000 | 0,0000 |
| ENSG00000167723  | TRPV3    | transient receptor potential cation channel, subfamily V, member 3 | 0,9679  | 1,9559 | 0,0001 | 0,0009 |
| ENSG00000111199  | TRPV4    | transient receptor potential cation channel, subfamily V, member 4 | 0,9840  | 1,9779 | 0,0000 | 0,0000 |
| ENSG00000165125  | TRPV6    | transient receptor potential cation channel, subfamily V, member 6 | 2,5499  | 5,8559 | 0,0000 | 0,0000 |
| ENSG00000102804  | TSC22D1  | TSC22 domain family, member 1                                      | -0,4485 | 0,7328 | 0,0000 | 0,0000 |
| ENSG00000157514  | TSC22D3  | TSC22 domain family, member 3                                      | 1,6942  | 3,2359 | 0,0000 | 0,0000 |
| ENSG00000182463  | TSHZ2    | teashirt zinc finger homeobox 2                                    | 0,9215  | 1,8941 | 0,0000 | 0,0000 |
| ENSG00000121297  | TSHZ3    | teashirt zinc finger homeobox 3                                    | -1,2474 | 0,4212 | 0,0000 | 0,0000 |
| ENSG00000145777  | TSLP     | thymic stromal lymphopoietin                                       | 0,9787  | 1,9707 | 0,0000 | 0,0001 |

|                 |         |                                                               |         |        |        |        |
|-----------------|---------|---------------------------------------------------------------|---------|--------|--------|--------|
| ENSG00000171045 | TSNARE1 | t-SNARE domain containing 1                                   | 0,8877  | 1,8502 | 0,0000 | 0,0000 |
| ENSG00000117472 | TSPAN1  | tetraspanin 1                                                 | 0,8184  | 1,7634 | 0,0000 | 0,0000 |
| ENSG00000106537 | TSPAN13 | tetraspanin 13                                                | -0,5822 | 0,6679 | 0,0000 | 0,0000 |
| ENSG00000099282 | TSPAN15 | tetraspanin 15                                                | 0,5660  | 1,4804 | 0,0000 | 0,0006 |
| ENSG00000134198 | TSPAN2  | tetraspanin 2                                                 | -0,7159 | 0,6088 | 0,0000 | 0,0000 |
| ENSG00000000003 | TSPAN6  | tetraspanin 6                                                 | -0,5614 | 0,6776 | 0,0000 | 0,0000 |
| ENSG00000127324 | TSPAN8  | tetraspanin 8                                                 | 2,2302  | 4,6919 | 0,0000 | 0,0000 |
| ENSG00000167721 | TSR1    | TSR1, 20S rRNA accumulation, homolog ( <i>S. cerevisiae</i> ) | -0,4121 | 0,7515 | 0,0000 | 0,0002 |
| ENSG00000178093 | TSSK6   | testis-specific serine kinase 6                               | 0,7898  | 1,7288 | 0,0010 | 0,0096 |
| ENSG00000128881 | TTBK2   | tau tubulin kinase 2                                          | 0,3802  | 1,3015 | 0,0000 | 0,0001 |
| ENSG00000113312 | TTC1    | tetratricopeptide repeat domain 1                             | -0,4172 | 0,7489 | 0,0000 | 0,0007 |
| ENSG00000143643 | TTC13   | tetratricopeptide repeat domain 13                            | -0,5234 | 0,6957 | 0,0000 | 0,0000 |
| ENSG00000183891 | TTC32   | tetratricopeptide repeat domain 32                            | 0,4146  | 1,3329 | 0,0002 | 0,0020 |
| ENSG00000113638 | TTC33   | tetratricopeptide repeat domain 33                            | 0,4152  | 1,3335 | 0,0006 | 0,0065 |
| ENSG00000215912 | TTC34   | tetratricopeptide repeat domain 34                            | 0,8815  | 1,8423 | 0,0000 | 0,0002 |
| ENSG00000085831 | TTC39A  | tetratricopeptide repeat domain 39A                           | 0,5349  | 1,4489 | 0,0007 | 0,0072 |
| ENSG00000168234 | TTC39C  | tetratricopeptide repeat domain 39C                           | -0,7451 | 0,5966 | 0,0000 | 0,0000 |
| ENSG00000116830 | TTF2    | transcription termination factor, RNA polymerase II           | -0,4696 | 0,7222 | 0,0000 | 0,0000 |
| ENSG00000100271 | TLL1    | tubulin tyrosine ligase-like family member 1                  | 0,8429  | 1,7936 | 0,0000 | 0,0001 |
| ENSG00000137561 | TTPA    | tocopherol (alpha) transfer protein                           | 0,6804  | 1,6025 | 0,0000 | 0,0000 |
| ENSG00000141540 | TTYH2   | tweety family member 2                                        | 0,9255  | 1,8994 | 0,0001 | 0,0011 |
| ENSG00000123416 | TUBA1B  | tubulin, alpha 1b                                             | -0,4540 | 0,7300 | 0,0000 | 0,0000 |
| ENSG00000167553 | TUBA1C  | tubulin, alpha 1c                                             | -0,4734 | 0,7203 | 0,0000 | 0,0000 |
| ENSG00000127824 | TUBA4A  | tubulin, alpha 4a                                             | -0,3850 | 0,7658 | 0,0000 | 0,0001 |
| ENSG00000074935 | TUBE1   | tubulin, epsilon 1                                            | 0,4395  | 1,3561 | 0,0001 | 0,0014 |
| ENSG00000037042 | TUBG2   | tubulin, gamma 2                                              | 0,6043  | 1,5202 | 0,0000 | 0,0000 |
| ENSG00000126216 | TUBGCP3 | tubulin, gamma complex associated protein 3                   | -0,4833 | 0,7154 | 0,0000 | 0,0001 |
| ENSG00000149016 | TUT1    | terminal uridylyl transferase 1, U6 snRNA-specific            | 0,6162  | 1,5328 | 0,0000 | 0,0000 |
| ENSG00000151239 | TWF1    | twinfilin actin binding protein 1                             | -0,3888 | 0,7638 | 0,0000 | 0,0005 |
| ENSG00000105849 | TWISTNB | TWIST neighbor                                                | -0,6054 | 0,6573 | 0,0000 | 0,0000 |
| ENSG00000128791 | TWSG1   | twisted gastrulation BMP signaling modulator 1                | -0,4646 | 0,7247 | 0,0000 | 0,0000 |

|                 |            |                                                                   |         |        |        |        |
|-----------------|------------|-------------------------------------------------------------------|---------|--------|--------|--------|
| ENSG00000086712 | TXLNG      | taxilin gamma                                                     | -0,4367 | 0,7388 | 0,0000 | 0,0002 |
| ENSG00000115514 | TXNDC9     | thioredoxin domain containing 9                                   | -0,4736 | 0,7202 | 0,0000 | 0,0001 |
| ENSG00000265972 | TXNIP      | thioredoxin interacting protein                                   | 0,6031  | 1,5189 | 0,0000 | 0,0000 |
| ENSG00000163714 | U2SURP     | U2 snRNP-associated SURP domain containing                        | -0,5130 | 0,7008 | 0,0000 | 0,0000 |
| ENSG00000197355 | UAP1L1     | UDP-N-acetylglucosamine pyrophosphorylase 1 like 1                | 0,4383  | 1,3550 | 0,0001 | 0,0012 |
| ENSG00000182179 | UBA7       | ubiquitin-like modifier activating enzyme 7                       | 1,0867  | 2,1239 | 0,0000 | 0,0000 |
| ENSG00000134882 | UBAC2      | UBA domain containing 2                                           | -0,6122 | 0,6542 | 0,0000 | 0,0000 |
| ENSG00000185262 | UBALD2     | UBA-like domain containing 2                                      | 0,4658  | 1,3811 | 0,0000 | 0,0004 |
| ENSG00000154127 | UBASH3B    | ubiquitin associated and SH3 domain containing B                  | -0,3971 | 0,7594 | 0,0000 | 0,0000 |
| ENSG00000170142 | UBE2E1     | ubiquitin-conjugating enzyme E2E 1                                | -0,4186 | 0,7482 | 0,0000 | 0,0002 |
| ENSG00000170035 | UBE2E3     | ubiquitin-conjugating enzyme E2E 3                                | -0,5022 | 0,7061 | 0,0000 | 0,0001 |
| ENSG00000184182 | UBE2F      | ubiquitin-conjugating enzyme E2F (putative)                       | -0,3791 | 0,7689 | 0,0004 | 0,0043 |
| ENSG00000184787 | UBE2G2     | ubiquitin-conjugating enzyme E2G 2                                | -0,4252 | 0,7447 | 0,0000 | 0,0000 |
| ENSG00000156587 | UBE2L6     | ubiquitin-conjugating enzyme E2L 6                                | 0,4017  | 1,3210 | 0,0008 | 0,0078 |
| ENSG00000177889 | UBE2N      | ubiquitin-conjugating enzyme E2N                                  | -0,5654 | 0,6758 | 0,0000 | 0,0000 |
| ENSG00000177414 | UBE2U      | ubiquitin-conjugating enzyme E2U (putative)                       | 1,8627  | 3,6368 | 0,0000 | 0,0000 |
| ENSG00000169139 | UBE2V2     | ubiquitin-conjugating enzyme E2 variant 2                         | -0,4363 | 0,7390 | 0,0000 | 0,0005 |
| ENSG00000114062 | UBE3A      | ubiquitin protein ligase E3A                                      | -0,5582 | 0,6792 | 0,0000 | 0,0000 |
| ENSG00000122042 | UBL3       | ubiquitin-like 3                                                  | -0,4060 | 0,7547 | 0,0000 | 0,0002 |
| ENSG00000138629 | UBL7       | ubiquitin-like 7                                                  | 0,4103  | 1,3290 | 0,0000 | 0,0003 |
| ENSG00000164332 | UBLCP1     | ubiquitin-like domain containing CTD phosphatase 1                | -0,4124 | 0,7514 | 0,0000 | 0,0003 |
| ENSG00000153560 | UBP1       | upstream binding protein 1 (LBP-1a)                               | -0,4150 | 0,7500 | 0,0000 | 0,0000 |
| ENSG00000225986 | UBXN10-AS1 | UBXN10 antisense RNA 1                                            | -0,7027 | 0,6144 | 0,0000 | 0,0001 |
| ENSG00000158062 | UBXN11     | UBX domain protein 11                                             | 0,3982  | 1,3179 | 0,0008 | 0,0080 |
| ENSG00000167671 | UBXN6      | UBX domain protein 6                                              | 0,4450  | 1,3613 | 0,0002 | 0,0027 |
| ENSG00000104691 | UBXN8      | UBX domain protein 8                                              | -0,7827 | 0,5813 | 0,0000 | 0,0000 |
| ENSG00000118939 | UCHL3      | ubiquitin carboxyl-terminal esterase L3 (ubiquitin thiolesterase) | -0,8655 | 0,5488 | 0,0000 | 0,0000 |
| ENSG00000175567 | UCP2       | uncoupling protein 2 (mitochondrial, proton carrier)              | 0,7050  | 1,6301 | 0,0000 | 0,0000 |
| ENSG00000120686 | UFM1       | ubiquitin-fold modifier 1                                         | -0,4947 | 0,7097 | 0,0000 | 0,0000 |
| ENSG00000148154 | UGCG       | UDP-glucose ceramide glucosyltransferase                          | -0,6886 | 0,6204 | 0,0000 | 0,0000 |
| ENSG00000102595 | UGGT2      | UDP-glucose glycoprotein glucosyltransferase 2                    | -0,8820 | 0,5426 | 0,0000 | 0,0000 |

|                 |           |                                                                      |         |        |        |        |
|-----------------|-----------|----------------------------------------------------------------------|---------|--------|--------|--------|
| ENSG00000065060 | UHRF1BP1  | UHRF1 binding protein 1                                              | 0,4226  | 1,3403 | 0,0000 | 0,0000 |
| ENSG00000111981 | ULBP1     | UL16 binding protein 1                                               | 1,0220  | 2,0307 | 0,0000 | 0,0000 |
| ENSG00000131019 | ULBP3     | UL16 binding protein 3                                               | 0,5154  | 1,4294 | 0,0000 | 0,0005 |
| ENSG00000177169 | ULK1      | unc-51 like autophagy activating kinase 1                            | 1,0403  | 2,0567 | 0,0000 | 0,0000 |
| ENSG00000083290 | ULK2      | unc-51 like autophagy activating kinase 2                            | 0,4478  | 1,3640 | 0,0003 | 0,0036 |
| ENSG00000168038 | ULK4      | unc-51 like kinase 4                                                 | -0,4417 | 0,7363 | 0,0000 | 0,0001 |
| ENSG00000114491 | UMPS      | uridine monophosphate synthetase                                     | -0,4326 | 0,7409 | 0,0000 | 0,0000 |
| ENSG00000130477 | UNC13A    | unc-13 homolog A (C. elegans)                                        | -0,6040 | 0,6579 | 0,0007 | 0,0071 |
| ENSG00000169062 | UPF3A     | UPF3 regulator of nonsense transcripts homolog A (yeast)             | -0,8380 | 0,5594 | 0,0000 | 0,0000 |
| ENSG00000226510 | UPK1A-AS1 | UPK1A antisense RNA 1                                                | 1,0619  | 2,0877 | 0,0000 | 0,0006 |
| ENSG00000137288 | UQCC2     | ubiquinol-cytochrome c reductase complex assembly factor 2           | 0,3807  | 1,3019 | 0,0000 | 0,0006 |
| ENSG00000169021 | UQCRFS1   | ubiquinol-cytochrome c reductase, Rieske iron-sulfur polypeptide 1   | -0,4052 | 0,7551 | 0,0002 | 0,0021 |
| ENSG00000135763 | URB2      | URB2 ribosome biogenesis 2 homolog (S. cerevisiae)                   | -0,6961 | 0,6172 | 0,0000 | 0,0000 |
| ENSG00000159650 | UROC1     | urocanate hydratase 1                                                | 0,6902  | 1,6135 | 0,0000 | 0,0000 |
| ENSG00000103005 | USB1      | U6 snRNA biogenesis 1                                                | -0,4142 | 0,7504 | 0,0000 | 0,0000 |
| ENSG00000006611 | USH1C     | Usher syndrome 1C                                                    | 0,9880  | 1,9835 | 0,0000 | 0,0000 |
| ENSG00000152484 | USP12     | ubiquitin specific peptidase 12                                      | -0,6692 | 0,6288 | 0,0000 | 0,0000 |
| ENSG00000058056 | USP13     | ubiquitin specific peptidase 13 (isopeptidase T-3)                   | -0,4402 | 0,7371 | 0,0000 | 0,0000 |
| ENSG00000101557 | USP14     | ubiquitin specific peptidase 14 (tRNA-guanine transglycosylase)      | -0,3959 | 0,7600 | 0,0000 | 0,0004 |
| ENSG00000135655 | USP15     | ubiquitin specific peptidase 15                                      | -0,4778 | 0,7181 | 0,0000 | 0,0000 |
| ENSG00000156256 | USP16     | ubiquitin specific peptidase 16                                      | -0,4020 | 0,7568 | 0,0000 | 0,0001 |
| ENSG00000136878 | USP20     | ubiquitin specific peptidase 20                                      | 0,4460  | 1,3623 | 0,0002 | 0,0024 |
| ENSG00000273820 | USP27X    | ubiquitin specific peptidase 27, X-linked                            | -0,6645 | 0,6309 | 0,0000 | 0,0000 |
| ENSG00000135093 | USP30     | ubiquitin specific peptidase 30                                      | 0,4247  | 1,3423 | 0,0005 | 0,0049 |
| ENSG00000148429 | USP6NL    | USP6 N-terminal like                                                 | -0,4408 | 0,7367 | 0,0000 | 0,0000 |
| ENSG00000156697 | UTP14A    | UTP14A small subunit (SSU) processome component                      | -0,8124 | 0,5694 | 0,0000 | 0,0000 |
| ENSG00000253797 | UTP14C    | UTP14, U3 small nucleolar ribonucleoprotein, homolog C (yeast)       | -0,7174 | 0,6082 | 0,0000 | 0,0000 |
| ENSG00000164338 | UTP15     | UTP15, U3 small nucleolar ribonucleoprotein, homolog (S. cerevisiae) | -0,5710 | 0,6731 | 0,0000 | 0,0000 |
| ENSG00000011260 | UTP18     | UTP18 small subunit (SSU) processome component                       | -0,3790 | 0,7690 | 0,0003 | 0,0032 |
| ENSG00000120800 | UTP20     | UTP20 small subunit (SSU) processome component                       | -0,7533 | 0,5932 | 0,0000 | 0,0000 |
| ENSG00000147679 | UTP23     | UTP23, small subunit (SSU) processome component, homolog (yeast)     | -0,5322 | 0,6915 | 0,0000 | 0,0000 |



|                 |         |                                                                         |         |        |        |        |
|-----------------|---------|-------------------------------------------------------------------------|---------|--------|--------|--------|
| ENSG00000132467 | UTP3    | UTP3, small subunit (SSU) processome component, homolog (S. cerevisiae) | -0,4049 | 0,7553 | 0,0000 | 0,0003 |
| ENSG00000220205 | VAMP2   | vesicle-associated membrane protein 2 (synaptobrevin 2)                 | 0,4657  | 1,3810 | 0,0000 | 0,0000 |
| ENSG00000112715 | VEGFA   | vascular endothelial growth factor A                                    | 0,5386  | 1,4525 | 0,0000 | 0,0000 |
| ENSG00000197415 | VEPH1   | ventricular zone expressed PH domain-containing 1                       | 0,4728  | 1,3878 | 0,0010 | 0,0091 |
| ENSG00000028203 | VEZT    | vezatin, adherens junctions transmembrane protein                       | -0,3899 | 0,7632 | 0,0000 | 0,0000 |
| ENSG00000128564 | VEGF    | VEGF nerve growth factor inducible                                      | -0,4118 | 0,7517 | 0,0002 | 0,0020 |
| ENSG00000206538 | VGLL3   | vestigial-like family member 3                                          | 0,8543  | 1,8078 | 0,0010 | 0,0094 |
| ENSG00000127831 | VIL1    | villin 1                                                                | 1,7526  | 3,3695 | 0,0000 | 0,0000 |
| ENSG00000136059 | VILL    | villin-like                                                             | 1,3568  | 2,5612 | 0,0000 | 0,0000 |
| ENSG00000229124 | VIM-AS1 | VIM antisense RNA 1                                                     | -0,4616 | 0,7262 | 0,0005 | 0,0048 |
| ENSG00000147852 | VLDLR   | very low density lipoprotein receptor                                   | -0,5560 | 0,6802 | 0,0000 | 0,0000 |
| ENSG00000062716 | VMP1    | vacuole membrane protein 1                                              | -0,4841 | 0,7150 | 0,0000 | 0,0000 |
| ENSG00000160948 | VPS28   | vacuolar protein sorting 28 homolog (S. cerevisiae)                     | 0,4626  | 1,3780 | 0,0001 | 0,0011 |
| ENSG00000136100 | VPS36   | vacuolar protein sorting 36 homolog (S. cerevisiae)                     | -0,6301 | 0,6461 | 0,0000 | 0,0000 |
| ENSG00000176428 | VPS37D  | vacuolar protein sorting 37 homolog D (S. cerevisiae)                   | 1,0828  | 2,1182 | 0,0000 | 0,0000 |
| ENSG00000100749 | VRK1    | vaccinia related kinase 1                                               | -0,4499 | 0,7321 | 0,0000 | 0,0005 |
| ENSG00000186806 | VSIG10L | V-set and immunoglobulin domain containing 10 like                      | 0,6164  | 1,5330 | 0,0000 | 0,0000 |
| ENSG00000100568 | VTI1B   | vesicle transport through interaction with t-SNAREs 1B                  | -0,3942 | 0,7609 | 0,0000 | 0,0005 |
| ENSG00000204396 | VWA7    | von Willebrand factor A domain containing 7                             | 0,8048  | 1,7469 | 0,0001 | 0,0010 |
| ENSG00000102763 | VWA8    | von Willebrand factor A domain containing 8                             | -0,4849 | 0,7145 | 0,0000 | 0,0000 |
| ENSG00000146530 | VWDE    | von Willebrand factor D and EGF domains                                 | 0,6176  | 1,5343 | 0,0002 | 0,0020 |
| ENSG00000110799 | VWF     | von Willebrand factor                                                   | 1,0256  | 2,0357 | 0,0000 | 0,0000 |
| ENSG00000140105 | WARS    | tryptophanyl-tRNA synthetase                                            | 0,4795  | 1,3942 | 0,0000 | 0,0000 |
| ENSG00000132970 | WASF3   | WAS protein family, member 3                                            | -0,4161 | 0,7494 | 0,0000 | 0,0000 |
| ENSG00000132471 | WBP2    | WW domain binding protein 2                                             | 0,5475  | 1,4615 | 0,0000 | 0,0000 |
| ENSG00000120688 | WBP4    | WW domain binding protein 4                                             | -0,4218 | 0,7465 | 0,0000 | 0,0004 |
| ENSG00000165171 | WBSCR27 | Williams Beuren syndrome chromosome region 27                           | 1,2611  | 2,3968 | 0,0000 | 0,0000 |
| ENSG00000101940 | WDR13   | WD repeat domain 13                                                     | 0,4708  | 1,3859 | 0,0002 | 0,0020 |
| ENSG00000157796 | WDR19   | WD repeat domain 19                                                     | 0,7034  | 1,6284 | 0,0000 | 0,0000 |
| ENSG00000140153 | WDR20   | WD repeat domain 20                                                     | -0,3868 | 0,7648 | 0,0000 | 0,0002 |
| ENSG00000065183 | WDR3    | WD repeat domain 3                                                      | -0,4725 | 0,7207 | 0,0000 | 0,0002 |

|                 |          |                                                               |         |        |        |        |
|-----------------|----------|---------------------------------------------------------------|---------|--------|--------|--------|
| ENSG00000148225 | WDR31    | WD repeat domain 31                                           | 0,6162  | 1,5328 | 0,0001 | 0,0017 |
| ENSG00000118965 | WDR35    | WD repeat domain 35                                           | -0,3992 | 0,7583 | 0,0000 | 0,0001 |
| ENSG00000134987 | WDR36    | WD repeat domain 36                                           | -0,5117 | 0,7014 | 0,0000 | 0,0000 |
| ENSG00000160193 | WDR4     | WD repeat domain 4                                            | -0,6207 | 0,6504 | 0,0000 | 0,0000 |
| ENSG00000163811 | WDR43    | WD repeat domain 43                                           | -0,7418 | 0,5980 | 0,0000 | 0,0000 |
| ENSG0000005448  | WDR54    | WD repeat domain 54                                           | 0,6423  | 1,5608 | 0,0000 | 0,0000 |
| ENSG00000116455 | WDR77    | WD repeat domain 77                                           | -0,7116 | 0,6106 | 0,0000 | 0,0000 |
| ENSG00000123154 | WDR83    | WD repeat domain 83                                           | 0,5032  | 1,4174 | 0,0001 | 0,0010 |
| ENSG00000228775 | WEE2-AS1 | WEE2 antisense RNA 1                                          | 0,9110  | 1,8804 | 0,0009 | 0,0084 |
| ENSG00000101443 | WFDC2    | WAP four-disulfide core domain 2                              | -0,7827 | 0,5813 | 0,0000 | 0,0000 |
| ENSG00000109501 | WFS1     | Wolfram syndrome 1 (wolframin)                                | 0,4698  | 1,3849 | 0,0001 | 0,0008 |
| ENSG00000070540 | WIPI1    | WD repeat domain, phosphoinositide interacting 1              | 0,6702  | 1,5913 | 0,0000 | 0,0000 |
| ENSG00000085741 | WNT11    | wingless-type MMTV integration site family, member 11         | 0,9689  | 1,9573 | 0,0000 | 0,0000 |
| ENSG00000114251 | WNT5A    | wingless-type MMTV integration site family, member 5A         | -0,9559 | 0,5155 | 0,0000 | 0,0000 |
| ENSG00000182093 | WRB      | tryptophan rich basic protein                                 | 0,3882  | 1,3087 | 0,0000 | 0,0007 |
| ENSG00000151718 | WWC2     | WW and C2 domain containing 2                                 | -0,4827 | 0,7156 | 0,0000 | 0,0000 |
| ENSG00000047644 | WWC3     | WWC family member 3                                           | -0,4198 | 0,7475 | 0,0000 | 0,0002 |
| ENSG00000018408 | WWTR1    | WW domain containing transcription regulator 1                | -0,5161 | 0,6993 | 0,0000 | 0,0000 |
| ENSG00000076924 | XAB2     | XPA binding protein 2                                         | 0,4867  | 1,4012 | 0,0000 | 0,0002 |
| ENSG00000260903 | XKR7     | XK, Kell blood group complex subunit-related family, member 7 | -1,5288 | 0,3466 | 0,0000 | 0,0000 |
| ENSG00000122121 | XPNPEP2  | X-prolyl aminopeptidase (aminopeptidase P) 2, membrane-bound  | 0,7450  | 1,6760 | 0,0007 | 0,0068 |
| ENSG00000132953 | XPO4     | exportin 4                                                    | -0,5928 | 0,6630 | 0,0000 | 0,0000 |
| ENSG00000212556 | Y_RNA    | Y RNA                                                         | -1,3027 | 0,4054 | 0,0000 | 0,0000 |
| ENSG00000241127 | YAE1D1   | Yae1 domain containing 1                                      | -0,4077 | 0,7538 | 0,0011 | 0,0098 |
| ENSG00000006047 | YBX2     | Y box binding protein 2                                       | 0,3798  | 1,3012 | 0,0000 | 0,0001 |
| ENSG00000167645 | YIF1B    | Yip1 interacting factor homolog B (S. cerevisiae)             | 0,4055  | 1,3246 | 0,0002 | 0,0021 |
| ENSG00000130733 | YIPF2    | Yip1 domain family, member 2                                  | 0,4524  | 1,3683 | 0,0001 | 0,0013 |
| ENSG00000100027 | YPEL1    | yippee-like 1                                                 | 1,8051  | 3,4945 | 0,0000 | 0,0000 |
| ENSG00000175155 | YPEL2    | yippee-like 2                                                 | 1,0255  | 2,0356 | 0,0000 | 0,0000 |
| ENSG00000090238 | YPEL3    | yippee-like 3                                                 | 1,1430  | 2,2084 | 0,0000 | 0,0000 |
| ENSG00000166793 | YPEL4    | yippee-like 4                                                 | 1,3391  | 2,5299 | 0,0000 | 0,0000 |

|                 |           |                                                                              |         |        |        |        |
|-----------------|-----------|------------------------------------------------------------------------------|---------|--------|--------|--------|
| ENSG00000166913 | YWHAB     | tyrosine 3-monooxygenase/tryptophan 5-monooxygenase activation protein, beta | -0,5156 | 0,6995 | 0,0000 | 0,0000 |
| ENSG00000128245 | YWHAH     | tyrosine 3-monooxygenase/tryptophan 5-monooxygenase activation protein, eta  | -0,4129 | 0,7511 | 0,0000 | 0,0007 |
| ENSG00000164924 | YWHAZ     | tyrosine 3-monooxygenase/tryptophan 5-monooxygenase activation protein, zeta | -0,4446 | 0,7348 | 0,0000 | 0,0000 |
| ENSG00000221886 | ZBED8     | zinc finger, BED-type containing 8                                           | 0,4137  | 1,3321 | 0,0001 | 0,0012 |
| ENSG00000236104 | ZBTB22    | zinc finger and BTB domain containing 22                                     | 0,7610  | 1,6947 | 0,0000 | 0,0000 |
| ENSG00000112365 | ZBTB24    | zinc finger and BTB domain containing 24                                     | -0,4570 | 0,7285 | 0,0000 | 0,0003 |
| ENSG00000114853 | ZBTB47    | zinc finger and BTB domain containing 47                                     | 0,6227  | 1,5398 | 0,0008 | 0,0079 |
| ENSG00000104427 | ZC2HC1A   | zinc finger, C2HC-type containing 1A                                         | 0,6447  | 1,5634 | 0,0000 | 0,0000 |
| ENSG00000149289 | ZC3H12C   | zinc finger CCCH-type containing 12C                                         | -0,4550 | 0,7295 | 0,0000 | 0,0000 |
| ENSG00000123200 | ZC3H13    | zinc finger CCCH-type containing 13                                          | -0,4889 | 0,7126 | 0,0000 | 0,0000 |
| ENSG00000100722 | ZC3H14    | zinc finger CCCH-type containing 14                                          | -0,4004 | 0,7577 | 0,0000 | 0,0001 |
| ENSG00000065548 | ZC3H15    | zinc finger CCCH-type containing 15                                          | -0,5097 | 0,7023 | 0,0000 | 0,0000 |
| ENSG00000188177 | ZC3H6     | zinc finger CCCH-type containing 6                                           | 0,7820  | 1,7195 | 0,0000 | 0,0000 |
| ENSG00000126970 | ZC4H2     | zinc finger, C4H2 domain containing                                          | -0,9079 | 0,5330 | 0,0000 | 0,0004 |
| ENSG00000160446 | ZDHC12    | zinc finger, DHHC-type containing 12                                         | 0,5028  | 1,4169 | 0,0006 | 0,0059 |
| ENSG00000175048 | ZDHC14    | zinc finger, DHHC-type containing 14                                         | -0,9099 | 0,5322 | 0,0000 | 0,0000 |
| ENSG00000180776 | ZDHC20    | zinc finger, DHHC-type containing 20                                         | -0,7445 | 0,5969 | 0,0000 | 0,0000 |
| ENSG00000023041 | ZDHC6     | zinc finger, DHHC-type containing 6                                          | -0,4732 | 0,7204 | 0,0000 | 0,0000 |
| ENSG00000133519 | ZDHC8P1   | zinc finger, DHHC-type containing 8 pseudogene 1                             | 0,7589  | 1,6922 | 0,0000 | 0,0000 |
| ENSG00000237036 | ZEB1-AS1  | ZEB1 antisense RNA 1                                                         | 0,4160  | 1,3342 | 0,0003 | 0,0037 |
| ENSG00000160445 | ZER1      | zyg-11 related, cell cycle regulator                                         | 0,6815  | 1,6038 | 0,0000 | 0,0000 |
| ENSG00000107372 | ZFAND5    | zinc finger, AN1-type domain 5                                               | -0,3889 | 0,7637 | 0,0000 | 0,0003 |
| ENSG00000128016 | ZFP36     | ZFP36 ring finger protein                                                    | 0,5526  | 1,4667 | 0,0000 | 0,0000 |
| ENSG00000165861 | ZFYVE1    | zinc finger, FYVE domain containing 1                                        | 0,5870  | 1,5021 | 0,0000 | 0,0000 |
| ENSG00000043355 | ZIC2      | Zic family member 2                                                          | -0,9916 | 0,5029 | 0,0000 | 0,0000 |
| ENSG00000139800 | ZIC5      | Zic family member 5                                                          | -1,0040 | 0,4986 | 0,0000 | 0,0000 |
| ENSG00000166432 | ZMAT1     | zinc finger, matrin-type 1                                                   | -0,8042 | 0,5727 | 0,0001 | 0,0012 |
| ENSG00000100319 | ZMAT5     | zinc finger, matrin-type 5                                                   | 0,5404  | 1,4543 | 0,0000 | 0,0003 |
| ENSG00000224596 | ZMIZ1-AS1 | ZMIZ1 antisense RNA 1                                                        | 1,0261  | 2,0365 | 0,0002 | 0,0021 |
| ENSG00000084073 | ZMPSTE24  | zinc metallopeptidase STE24                                                  | -0,6692 | 0,6289 | 0,0000 | 0,0000 |
| ENSG00000197020 | ZNF100    | zinc finger protein 100                                                      | -0,5232 | 0,6958 | 0,0000 | 0,0002 |

|                 |            |                                       |         |        |        |        |
|-----------------|------------|---------------------------------------|---------|--------|--------|--------|
| ENSG00000152926 | ZNF117     | zinc finger protein 117               | -0,5035 | 0,7054 | 0,0004 | 0,0042 |
| ENSG00000167635 | ZNF146     | zinc finger protein 146               | -0,4038 | 0,7558 | 0,0000 | 0,0006 |
| ENSG00000197279 | ZNF165     | zinc finger protein 165               | 0,4267  | 1,3441 | 0,0001 | 0,0008 |
| ENSG00000154957 | ZNF18      | zinc finger protein 18                | 0,4604  | 1,3760 | 0,0001 | 0,0009 |
| ENSG00000167384 | ZNF180     | zinc finger protein 180               | -0,6710 | 0,6281 | 0,0000 | 0,0000 |
| ENSG00000005801 | ZNF195     | zinc finger protein 195               | -0,4436 | 0,7353 | 0,0000 | 0,0002 |
| ENSG00000166261 | ZNF202     | zinc finger protein 202               | -0,4075 | 0,7539 | 0,0000 | 0,0001 |
| ENSG00000204789 | ZNF204P    | zinc finger protein 204, pseudogene   | 1,0207  | 2,0288 | 0,0000 | 0,0000 |
| ENSG00000165512 | ZNF22      | zinc finger protein 22                | -0,4535 | 0,7303 | 0,0000 | 0,0000 |
| ENSG00000213096 | ZNF254     | zinc finger protein 254               | -0,3839 | 0,7664 | 0,0003 | 0,0034 |
| ENSG00000198393 | ZNF26      | zinc finger protein 26                | -0,5839 | 0,6672 | 0,0000 | 0,0000 |
| ENSG00000063587 | ZNF275     | zinc finger protein 275               | -0,5671 | 0,6749 | 0,0000 | 0,0000 |
| ENSG00000137871 | ZNF280D    | zinc finger protein 280D              | -0,3811 | 0,7679 | 0,0004 | 0,0041 |
| ENSG00000167637 | ZNF283     | zinc finger protein 283               | -0,4165 | 0,7492 | 0,0002 | 0,0020 |
| ENSG00000130844 | ZNF331     | zinc finger protein 331               | -0,4388 | 0,7377 | 0,0000 | 0,0002 |
| ENSG00000230753 | ZNF341-AS1 | ZNF341 antisense RNA 1                | -0,4907 | 0,7117 | 0,0002 | 0,0020 |
| ENSG00000169981 | ZNF35      | zinc finger protein 35                | -0,5638 | 0,6765 | 0,0000 | 0,0000 |
| ENSG00000198816 | ZNF358     | zinc finger protein 358               | 0,7406  | 1,6708 | 0,0000 | 0,0000 |
| ENSG00000144331 | ZNF385B    | zinc finger protein 385B              | 1,4305  | 2,6955 | 0,0000 | 0,0000 |
| ENSG00000186918 | ZNF395     | zinc finger protein 395               | 0,5820  | 1,4969 | 0,0000 | 0,0000 |
| ENSG00000186812 | ZNF397     | zinc finger protein 397               | 0,6208  | 1,5378 | 0,0000 | 0,0001 |
| ENSG00000083838 | ZNF446     | zinc finger protein 446               | 0,6333  | 1,5511 | 0,0000 | 0,0001 |
| ENSG00000148143 | ZNF462     | zinc finger protein 462               | -0,4466 | 0,7338 | 0,0000 | 0,0000 |
| ENSG00000198464 | ZNF480     | zinc finger protein 480               | -0,4059 | 0,7548 | 0,0001 | 0,0008 |
| ENSG00000243943 | ZNF512     | zinc finger protein 512               | -0,5054 | 0,7045 | 0,0000 | 0,0001 |
| ENSG00000163795 | ZNF513     | zinc finger protein 513               | 0,4878  | 1,4023 | 0,0002 | 0,0020 |
| ENSG00000172006 | ZNF554     | zinc finger protein 554               | 0,5165  | 1,4305 | 0,0000 | 0,0007 |
| ENSG00000142556 | ZNF614     | zinc finger protein 614               | -0,4581 | 0,7279 | 0,0000 | 0,0001 |
| ENSG00000198093 | ZNF649     | zinc finger protein 649               | -0,3926 | 0,7618 | 0,0004 | 0,0042 |
| ENSG00000277462 | ZNF670     | zinc finger protein 670               | -0,4642 | 0,7249 | 0,0007 | 0,0066 |
| ENSG00000230844 | ZNF674-AS1 | ZNF674 antisense RNA 1 (head to head) | -0,7297 | 0,6030 | 0,0000 | 0,0000 |

|                 |         |                                                |         |        |        |        |
|-----------------|---------|------------------------------------------------|---------|--------|--------|--------|
| ENSG00000229809 | ZNF688  | zinc finger protein 688                        | 0,5718  | 1,4864 | 0,0001 | 0,0015 |
| ENSG00000143067 | ZNF697  | zinc finger protein 697                        | -0,5418 | 0,6869 | 0,0000 | 0,0000 |
| ENSG00000183779 | ZNF703  | zinc finger protein 703                        | 0,4551  | 1,3709 | 0,0000 | 0,0000 |
| ENSG00000147180 | ZNF711  | zinc finger protein 711                        | -0,7743 | 0,5847 | 0,0001 | 0,0011 |
| ENSG00000178665 | ZNF713  | zinc finger protein 713                        | 0,9307  | 1,9062 | 0,0000 | 0,0000 |
| ENSG00000162086 | ZNF75A  | zinc finger protein 75a                        | -0,4450 | 0,7346 | 0,0003 | 0,0038 |
| ENSG00000169957 | ZNF768  | zinc finger protein 768                        | 0,3851  | 1,3059 | 0,0001 | 0,0016 |
| ENSG00000196456 | ZNF775  | zinc finger protein 775                        | 0,8823  | 1,8434 | 0,0000 | 0,0001 |
| ENSG00000170100 | ZNF778  | zinc finger protein 778                        | -0,4160 | 0,7495 | 0,0003 | 0,0034 |
| ENSG00000128000 | ZNF780B | zinc finger protein 780B                       | -0,4051 | 0,7552 | 0,0001 | 0,0010 |
| ENSG00000180884 | ZNF792  | zinc finger protein 792                        | -0,6142 | 0,6533 | 0,0000 | 0,0000 |
| ENSG00000151612 | ZNF827  | zinc finger protein 827                        | -0,5340 | 0,6907 | 0,0000 | 0,0000 |
| ENSG00000124203 | ZNF831  | zinc finger protein 831                        | 2,8018  | 6,9731 | 0,0000 | 0,0000 |
| ENSG00000196605 | ZNF846  | zinc finger protein 846                        | 0,6047  | 1,5206 | 0,0003 | 0,0036 |
| ENSG00000236609 | ZNF853  | zinc finger protein 853                        | -0,8119 | 0,5696 | 0,0000 | 0,0000 |
| ENSG00000106479 | ZNF862  | zinc finger protein 862                        | 0,5758  | 1,4905 | 0,0000 | 0,0000 |
| ENSG00000117174 | ZNHIT6  | zinc finger, HIT-type containing 6             | -0,4673 | 0,7233 | 0,0000 | 0,0002 |
| ENSG00000149506 | ZP1     | zona pellucida glycoprotein 1 (sperm receptor) | 1,3227  | 2,5013 | 0,0000 | 0,0000 |
| ENSG00000188372 | ZP3     | zona pellucida glycoprotein 3 (sperm receptor) | 0,5107  | 1,4248 | 0,0001 | 0,0007 |
| ENSG00000132485 | ZRANB2  | zinc finger, RAN-binding domain containing 2   | -0,4070 | 0,7542 | 0,0000 | 0,0006 |
| ENSG00000086827 | ZW10    | zw10 kinetochore protein                       | -0,4146 | 0,7502 | 0,0001 | 0,0009 |
| ENSG00000174442 | ZWILCH  | zwilch kinetochore protein                     | -0,4541 | 0,7300 | 0,0000 | 0,0000 |
